# Supplementary material for: Building Up a Robust Risk Mathematical Platform to Predict Colorectal Cancer
Source: Hindawi journal article supplement (doi:10.1155/2017/8917258), 2017-01-01
Supplement: f1 [file 8917258.f1.zip]

Archive with 6 entries (5 files):
- Supplementary/Supplementary S1.xlsx
- Supplementary/Supplementary S2.xlsx
- Supplementary/Supplementary S3.xlsx
- Supplementary/Supplementary S4.xlsx
- Supplementary/Supplementary S5.docx
- Supplementary/
