# Supplementary material for: Building Up a Robust Risk Mathematical Platform to Predict Colorectal Cancer
Source: Hindawi journal article supplement (doi:10.1155/2017/8917258), 2017-01-01
Supplement: f1 [file 8917258.f1.zip › Supplementary/Supplementary S2.xlsx]

## Sheet: data
sex	age	labour	BMI_now_group	BMI_10_group	activity	family_size	marriage	emotion	character	mood	relationship	trauma	depress	sleeping	exercise	cholesterol	blood_fat	fat_results	cancer1	cancer2	class
0	55	1	18.1312	19.3962	5	6	2	2	3	2	2	1	1	3	2	2	2	0	0	0	0
0	65	2	24.974	22.6003	3	2	2	2	1	1	2	1	1	4	2	2	2	0	0	0	0
0	37	1	19.4674	18.5078	3	4	2	3	1	2	2	2	2	6	2	2	2	0	1	0	0
0	67	1	21.3593	20.3954	3	6	5	2	1	3	1	1	1	3	2	2	2	0	1	0	0
0	38	1	23.8751	23.8751	5	4	2	3	1	2	3	1	1	5	2	2	2	0	0	0	0
1	52	3	27.2311	21.2245	2	3	2	2	2	1	2	1	1	5	2	1	1	1	1	0	0
0	49	1	21.7555	23.7332	5	4	2	2	1	1	2	1	1	2	2	2	2	0	0	0	0
1	45	1	22.0386	21.5139	3	1	4	5	2	2	2	2	2	6	2	1	1	1	0	0	0
1	67	3	24.2424	19.721	3	2	5	2	2	2	2	1	1	5	1	1	1	1	1	0	0
1	53	2	22.0317	23.4375	3	3	2	2	1	2	3	2	1	5	2	2	2	0	0	0	0
0	29	2	24.0344	23.1247	1	1	2	2	1	3	2	1	1	6	2	2	2	0	0	0	0
0	39	3	19.9792	19.1467	4	3	2	2	3	1	2	1	1	6	2	2	2	0	0	0	0
0	35	2	23.03	21.9671	4	5	2	2	1	1	2	1	1	6	2	2	2	0	0	0	0
1	49	3	25.9516	17.9931	3	3	2	2	1	1	2	1	1	5	1	1	1	1	0	0	0
0	27	2	20.5688	23.7332	3	3	2	2	2	1	1	1	1	5	2	2	2	0	0	0	0
1	61	1	21.4533	23.1206	5	6	2	4	1	3	3	1	2	3	2	2	2	0	0	0	0
1	45	1	22.9568	21.9671	5	4	2	3	1	1	1	1	1	6	2	1	1	1	0	0	0
0	51	1	21.9388	24.7967	2	4	2	1	1	3	1	1	1	4	2	2	2	0	0	0	0
0	70	3	28.441	20.9644	1	4	2	2	1	1	2	1	1	3	2	2	2	0	0	0	0
0	50	1	22.8928	17.0392	3	2	2	2	1	1	2	1	1	5	2	2	2	0	0	0	0
1	55	1	25.6837	26.1593	3	2	2	2	3	1	1	1	1	5	2	2	2	0	0	0	0
1	67	3	21.048	19.487	4	4	2	2	1	3	2	1	1	5	1	2	2	0	0	0	0
0	34	2	21.0303	22.8928	4	7	2	2	1	2	3	1	1	5	2	2	2	0	0	0	0
1	45	3	26.9274	18.424	3	4	2	2	2	1	2	1	1	5	2	1	1	3	1	0	0
0	60	3	20.7756	21.3593	3	4	2	2	2	1	2	1	1	3	1	1	1	1	0	0	0
1	67	1	20.202	21.5139	5	1	5	2	1	2	2	1	1	5	1	2	2	0	0	0	0
0	69	2	25.2994	22.6003	4	2	2	2	1	1	2	1	1	4	1	2	2	0	0	0	0
1	60	2	24.8016	22.4913	3	2	2	2	1	2	2	1	1	3	1	2	2	0	0	0	0
0	33	3	21.6418	16.937	4	3	2	2	1	2	2	1	1	5	2	2	2	0	0	0	0
1	50	1	24.1672	20.202	4	3	2	2	1	2	2	1	1	1	2	2	2	0	1	0	0
1	70	3	18.8092	18.5911	4	2	2	2	1	2	2	1	1	6	1	2	2	0	0	0	0
0	53	2	20.1348	21.7784	3	4	2	2	1	2	2	1	1	3	1	2	2	0	0	0	0
0	64	3	22.8928	20.5457	3	2	2	2	2	2	2	1	1	3	1	2	1	3	0	0	0
0	49	3	20.9572	21.7193	3	2	2	2	1	1	2	1	1	3	2	1	1	1	0	0	0
1	39	2	21.1389	20.0474	7	3	2	2	2	1	2	1	1	5	2	1	1	1	0	0	0
1	69	3	19.0311	20.7612	5	6	2	2	2	1	2	1	1	5	1	1	1	2	1	0	0
0	70	1	17.4818	21.0938	5	6	2	2	1	1	2	1	1	3	1	1	1	1	0	0	0
1	55	2	27.5482	22.0386	2	3	2	2	1	1	2	1	1	5	2	1	1	1	1	0	0
1	61	2	22.8624	22.4813	3	3	2	2	1	1	2	2	1	3	2	1	1	1	0	1	0
0	70	1	23.4221	20.0288	4	6	2	2	1	1	2	1	2	2	2	1	1	1	0	0	0
1	58	3	20.3074	20.7612	1	2	2	2	1	1	2	1	1	5	2	1	1	1	0	0	0
1	70	3	18.4139	25.3086	3	2	2	2	1	1	2	1	1	5	1	1	1	1	0	0	0
1	54	1	19.257	18.3655	5	3	2	2	3	1	2	1	1	6	2	1	1	1	0	0	0
0	34	1	21.6441	25.8065	4	4	2	2	2	3	3	1	1	6	2	2	2	0	0	0	0
0	57	2	26.6667	20	3	4	2	2	1	3	2	1	1	5	1	2	2	0	0	0	0
1	57	3	22.7732	22.0386	3	2	2	2	2	1	2	1	1	2	1	2	2	0	0	0	0
1	40	3	20.9573	20.2812	3	3	2	2	1	1	2	1	1	5	2	1	1	1	0	0	0
1	48	3	18.7783	19.8413	3	2	2	2	1	1	2	1	1	5	2	1	1	1	0	0	0
1	63	2	21.8724	19.721	4	6	2	2	2	1	2	1	1	5	2	1	1	2	0	0	0
0	70	2	24.974	18.7305	4	5	2	2	1	1	2	1	1	4	1	1	1	2	0	0	0
0	62	2	25.8065	24.5578	4	2	2	2	1	1	2	1	1	4	2	2	2	0	0	0	0
1	53	2	21.0077	20.1323	4	3	2	2	1	1	2	1	1	6	2	2	2	0	0	0	0
1	37	1	18.3655	20.202	5	6	2	2	1	1	2	2	2	6	2	1	1	1	0	0	0
1	38	1	19.0311	19.0311	5	3	2	2	1	3	3	1	1	2	2	2	2	0	0	0	0
0	49	2	24.0346	22.4323	5	3	2	2	1	1	2	1	1	4	2	2	2	0	0	0	0
0	57	2	25.3906	15.4315	4	6	2	2	1	2	2	1	1	4	1	2	2	0	0	0	0
0	49	3	22.8928	19.563	4	2	2	2	1	1	2	2	2	4	2	1	1	1	1	0	0
0	54	1	25.711	19.5312	5	3	2	2	1	3	2	1	1	4	1	2	2	0	0	0	0
0	62	2	24.3418	15.8221	5	1	5	2	1	1	2	1	1	4	2	1	1	1	0	0	0
0	46	3	23.634	18.4265	3	4	2	2	2	2	2	1	1	4	1	1	1	2	0	0	0
0	38	3	21.0828	20.9566	4	5	2	2	2	1	2	1	1	3	2	2	2	0	1	0	0
0	57	3	27.3438	23.4375	5	4	2	2	1	2	2	1	1	4	2	1	1	1	1	0	0
1	58	2	19.8507	17.9592	3	3	2	2	1	2	2	1	1	5	2	2	2	0	0	0	0
1	58	1	25.8022	25.1096	4	2	2	2	2	2	2	1	1	3	2	2	2	0	0	0	0
1	47	1	23.4375	24.0055	4	5	2	2	2	2	2	1	1	3	2	2	2	0	0	0	0
1	67	3	27.6817	22.2291	4	5	2	2	1	2	2	1	1	5	1	1	1	1	1	0	0
0	66	1	19.5556	23.7812	3	4	2	2	3	1	2	2	2	5	2	2	2	0	0	0	0
1	57	1	18.6851	19.0311	5	4	2	2	1	1	2	1	1	2	2	2	2	0	0	0	0
0	37	2	22.151	18.026	5	3	2	2	1	1	3	1	1	6	2	2	2	0	0	0	0
1	66	1	22.7903	24.7721	3	4	5	2	1	1	3	1	1	2	2	1	1	1	0	0	0
0	44	1	22.2063	21.4844	5	3	2	3	1	1	1	2	2	5	2	2	2	0	0	0	0
0	62	1	24.7409	19.9594	3	5	2	2	1	1	1	1	1	3	1	2	2	0	0	1	0
1	59	1	21.6311	24.1415	5	8	2	2	2	2	2	1	1	5	1	2	2	0	0	0	0
0	66	1	27.8876	22.3133	2	3	5	2	2	1	3	1	1	6	2	2	2	0	1	0	0
1	55	1	26.6436	18.6851	5	2	2	3	1	1	3	2	2	5	1	2	2	0	0	0	0
1	62	2	23.1834	22.4913	4	5	2	2	1	1	2	1	1	4	2	2	2	0	0	0	0
1	55	1	20.5499	21.1073	5	2	2	2	1	1	3	1	1	2	2	2	2	0	0	0	0
1	39	2	23.3067	19.721	3	4	2	2	1	1	1	1	1	4	2	2	2	0	0	0	0
0	45	3	22.4766	15.8169	5	3	2	2	3	1	2	1	1	3	1	2	2	0	1	0	0
1	60	1	22.4913	20.7612	4	3	1	2	2	1	2	1	1	5	2	1	1	1	0	0	0
1	70	2	17.9931	20.2812	4	2	3	3	1	3	2	1	1	5	1	1	1	2	0	0	0
0	56	2	21.6441	24.974	3	2	2	2	1	1	2	1	1	4	2	2	2	0	0	0	0
1	52	1	21.1263	21.6333	3	2	2	2	1	1	1	1	1	3	2	2	2	0	0	0	0
0	52	3	28.959	21.7193	2	4	2	2	1	1	2	1	1	6	2	1	1	2	0	0	0
1	52	2	24.7409	19.721	1	6	2	2	1	1	2	1	1	6	2	1	1	2	0	0	0
1	46	1	21.2306	21.6311	5	4	2	2	2	1	3	1	1	6	2	2	2	0	0	0	0
0	38	1	20.5457	20.5457	5	4	2	2	2	2	3	1	1	6	2	2	2	0	0	0	0
1	45	3	24.9108	20.4491	4	4	2	2	1	1	3	1	1	6	2	1	1	1	0	0	0
1	52	3	21.6713	19.7055	3	4	2	2	3	1	2	1	1	2	2	1	1	1	0	0	0
1	50	1	26.9557	22.3081	5	3	2	3	1	2	2	1	1	3	2	2	2	0	0	0	0
0	47	2	27.4348	24.7676	4	3	2	2	1	1	3	1	1	5	2	2	2	0	1	0	0
1	37	1	21.875	23.4375	5	3	2	2	1	1	2	1	1	5	2	2	2	0	0	0	0
1	48	1	19.2672	21.2953	5	2	2	2	1	1	2	1	1	3	2	2	2	0	0	0	0
1	39	1	22.1003	20.9572	5	5	2	2	2	1	2	1	1	5	2	2	2	0	0	0	0
1	44	3	24.9135	18.3655	3	2	2	2	3	1	3	2	1	6	2	1	1	2	0	0	0
1	53	1	24.8016	19.487	5	5	2	2	3	1	2	1	1	6	2	1	1	0	0	0	0
1	39	2	25.3069	20.5191	5	4	1	1	2	1	2	1	1	5	2	1	1	1	0	0	0
1	59	1	22.2041	20.898	5	3	2	2	1	1	2	1	1	5	2	1	1	1	1	0	0
0	40	1	21.2306	22.0317	3	4	2	2	2	1	2	1	1	4	2	1	1	1	0	0	0
1	56	1	21.5139	19.721	5	5	5	5	1	2	2	1	1	5	2	2	2	0	0	0	0
1	48	1	18.9745	20.2395	5	4	2	2	2	2	2	2	2	4	2	2	2	0	0	0	0
0	70	3	18.7305	20.8117	4	4	5	5	1	1	2	1	1	3	1	1	1	1	0	0	0
0	51	2	24.974	18.7305	2	4	2	2	2	1	2	2	1	6	1	1	1	1	0	0	0
0	54	3	28.0404	19.2277	2	4	2	2	1	1	2	1	2	3	2	1	1	1	0	1	0
0	38	2	23.2335	22.4323	2	3	2	2	1	3	2	1	1	6	2	1	1	1	0	0	0
0	42	2	23.4375	21.9899	5	3	2	2	1	2	2	1	2	5	2	1	1	1	0	0	0
0	40	2	21.5019	23.5304	3	3	2	2	1	3	2	1	1	6	2	1	1	1	1	0	0
0	55	3	17.4818	18.902	5	5	2	2	2	1	2	1	1	5	2	1	1	1	0	0	0
1	30	3	25.2826	23.7954	3	2	2	2	2	1	2	1	1	3	2	1	1	1	0	0	0
1	60	1	21.2585	23.03	5	4	2	2	1	2	2	1	1	2	2	1	1	1	0	0	0
1	57	1	20.9042	19.487	5	2	2	2	1	1	2	1	1	5	2	2	2	0	0	0	0
1	60	3	20.7008	20.3244	2	4	2	2	2	1	2	1	1	3	2	1	1	1	0	0	0
1	48	2	26.2346	20.0617	2	3	2	2	2	2	2	1	1	5	2	1	1	1	1	0	0
1	60	3	21.2585	21.2585	3	2	2	2	2	2	2	1	1	5	2	1	2	2	0	0	0
1	48	1	22.0386	23.1405	5	3	2	2	2	1	2	1	1	4	2	2	2	0	1	0	0
1	44	2	26.7299	22.7204	2	3	2	2	1	1	2	1	1	6	1	1	1	1	1	1	0
0	64	3	20.8117	20.4876	2	2	2	2	2	1	2	1	1	5	1	1	1	1	0	0	0
1	45	2	23.4375	19.5312	5	4	2	2	1	1	2	1	1	3	2	2	2	0	0	0	0
0	59	3	22.5827	16.937	1	5	2	2	2	1	2	1	1	1	2	1	1	1	1	0	0
0	36	3	20.4294	19.2277	5	4	2	2	2	1	2	1	1	8	2	2	2	0	0	0	0
1	40	3	31.1419	21.6263	2	3	2	2	2	1	2	1	1	5	2	1	1	1	0	0	0
1	40	3	26.6122	22.8571	5	1	1	2	2	1	2	1	1	5	2	1	1	1	0	0	0
1	58	2	24.5675	21.9713	5	2	2	2	1	1	2	1	1	5	2	1	1	1	0	0	0
1	31	3	20.7031	20.7031	5	4	2	2	1	1	2	1	1	4	2	2	2	0	0	0	0
0	65	2	23.8281	25.3906	5	6	2	2	2	1	2	1	1	5	2	2	2	0	0	0	0
1	69	2	22.3094	21.6333	2	2	2	2	3	1	2	1	1	5	2	1	1	1	1	0	0
1	64	3	19.8177	21.4692	3	2	2	2	1	1	2	1	1	2	2	1	1	2	0	0	0
1	35	1	20.9042	23.03	5	4	2	2	2	1	2	1	1	5	2	2	2	0	0	0	0
1	62	1	21.0938	19.5312	5	6	2	2	2	1	2	1	1	5	2	1	1	2	0	0	0
0	44	3	22.6003	21.3675	4	3	2	2	1	1	2	1	1	2	2	1	1	1	0	0	0
1	50	1	27.6817	19.0311	4	3	2	2	1	2	2	1	1	4	2	1	1	2	2	0	0
0	55	2	27.7671	17.0874	2	4	2	2	2	1	2	1	1	5	2	1	1	1	0	0	0
1	56	3	25.5102	19.8413	3	5	2	2	1	2	2	2	2	3	2	1	1	1	1	0	0
0	48	1	25.4767	20.5457	5	4	2	2	1	1	2	1	1	4	2	2	2	0	0	0	0
1	63	3	20.0474	18.3768	3	4	2	2	1	1	2	1	1	5	2	1	1	1	0	0	0
1	67	3	18.9069	20.6575	3	5	2	2	3	1	2	1	1	3	1	1	1	1	1	0	0
1	31	1	23.03	21.2585	3	4	2	2	1	2	2	2	1	4	2	2	2	0	1	0	0
1	71	1	15.2417	17.7154	5	6	2	2	1	2	2	1	1	3	2	2	2	0	0	0	0
1	32	1	22.5306	21.7993	5	3	1	2	2	3	2	1	1	6	2	2	2	0	0	0	0
1	52	2	25.3515	22.4913	2	2	2	2	3	3	1	1	1	5	1	1	1	2	0	0	0
1	32	1	20.0474	23.6614	5	5	2	2	3	3	2	1	1	5	2	2	2	0	0	0	0
1	51	1	20.7612	20.0692	5	3	2	2	1	1	2	1	1	5	2	1	1	1	0	0	0
0	67	2	26.0146	24.974	5	3	2	2	1	1	2	1	1	3	1	1	1	4	0	0	0
1	50	1	15.5709	17.9931	5	3	2	2	1	1	2	1	1	3	2	1	1	1	0	0	0
1	63	3	23.3887	21.4692	5	2	2	2	1	1	2	1	1	3	2	1	1	1	0	0	0
1	58	1	29.3848	25.0995	4	4	2	2	1	2	3	1	1	4	2	2	2	0	0	0	0
0	65	3	24.6548	17.0392	4	3	2	2	1	1	2	1	1	5	1	1	1	2	0	0	0
1	61	3	21.1263	18.3768	2	3	2	2	1	1	2	1	1	1	2	1	1	1	0	0	0
0	70	1	27.3438	17.1468	4	1	5	3	1	2	2	1	1	3	1	2	2	0	1	0	0
1	47	1	20.1951	19.052	5	2	2	2	1	2	2	1	1	2	2	2	2	0	1	0	0
1	45	3	22.3863	20.0474	2	3	2	2	1	1	2	1	1	5	2	2	2	0	0	0	0
1	52	2	25.1486	20.7008	5	5	2	2	3	2	2	1	1	4	2	2	2	0	0	0	0
0	56	3	24.1672	20.4491	3	2	2	2	2	1	2	1	1	5	2	2	2	0	0	0	0
1	50	3	26.673	26.5731	4	3	2	2	2	2	2	1	1	5	2	2	2	0	2	0	0
0	67	3	22.8624	22.1003	3	8	2	2	1	3	2	1	1	1	2	2	2	0	0	0	0
1	42	2	21.7079	23.03	4	4	2	2	2	2	2	1	1	5	2	2	2	0	0	0	0
0	68	2	24.7676	20.7008	4	2	2	2	1	1	2	1	1	4	1	1	1	3	0	1	0
0	64	2	19.563	18.2563	5	5	2	2	2	2	2	1	1	4	2	2	2	0	0	0	0
0	60	1	22.7694	24.974	5	5	2	2	1	1	2	1	1	3	2	2	2	0	0	0	0
1	59	1	20.061	23.9188	5	2	2	2	1	3	2	1	1	2	2	2	2	0	0	0	0
1	46	1	24.977	19.5312	4	3	2	2	2	1	2	1	1	5	1	2	2	0	0	0	0
1	51	2	25.4028	22.4996	3	2	2	2	3	1	2	1	1	3	1	2	2	0	0	0	0
0	64	1	26.8352	21.6413	4	1	5	2	1	2	2	1	1	4	2	2	2	0	1	0	0
1	35	1	19.2901	21.6049	5	3	2	2	3	1	2	1	1	5	2	1	1	1	0	0	0
0	50	1	26.6667	22.2222	5	6	2	2	1	1	2	1	1	6	2	1	1	0	0	0	0
0	54	2	21.6441	24.6548	4	3	2	2	1	1	2	1	1	4	2	2	2	0	0	0	0
0	51	2	26.7094	22.6003	4	2	2	2	1	1	2	1	1	6	1	2	2	0	0	0	0
1	67	2	22.0317	26.6728	3	6	2	2	1	3	3	2	2	6	2	2	2	0	0	0	0
1	47	1	25.6874	24.8016	5	4	2	2	1	1	3	1	1	5	2	2	2	0	0	0	0
1	57	3	25.9701	26.0262	2	4	2	2	1	1	2	1	1	6	2	1	1	2	0	0	0
1	70	2	26.1224	22.8571	5	2	2	2	1	2	2	1	1	5	2	1	1	1	0	0	0
1	58	3	26.0262	22.0386	3	3	2	2	1	2	2	1	1	5	2	2	2	0	0	0	0
1	69	3	26.7094	22.0317	4	5	2	2	1	2	2	1	1	4	2	1	1	2	1	0	0
1	50	1	22.8571	21.2245	5	3	2	2	2	3	2	1	1	4	2	2	2	0	0	0	0
0	66	3	20.7008	27.8852	4	5	5	2	2	2	2	1	1	5	2	2	2	0	0	0	0
1	59	3	22.8624	24.4646	3	3	2	2	2	1	2	1	1	5	2	1	1	2	0	1	0
1	62	2	24.2215	20.5191	3	2	2	2	1	2	3	1	1	3	1	1	1	1	0	0	0
0	63	2	20.5457	21.4844	5	2	2	2	2	2	2	1	1	3	2	2	2	0	0	0	0
1	42	1	19.5312	19.5312	5	1	2	2	1	1	2	1	1	5	2	2	2	0	0	0	0
1	60	1	22.4913	22.4913	5	5	2	2	1	2	2	1	1	3	2	2	2	0	0	0	0
0	61	2	28.5665	18.9745	4	2	2	2	1	2	2	1	1	5	1	1	1	2	0	0	0
0	57	1	20.992	22.5069	5	4	2	2	1	2	2	1	1	4	1	2	2	0	0	0	0
0	55	1	22.8624	25.3906	4	5	2	2	2	2	2	1	1	4	2	2	2	0	0	0	0
1	41	3	25.9516	21.2585	4	3	2	2	2	2	2	1	1	5	2	1	1	1	0	0	0
0	37	3	22.8624	22.1003	3	3	2	2	2	1	2	1	1	2	2	2	2	0	0	0	0
0	56	3	21.4844	23.4375	3	2	2	2	2	1	1	1	1	5	1	1	1	1	0	1	0
1	62	2	31.1419	27.6817	4	2	2	2	1	2	2	1	1	5	2	1	1	1	1	0	0
0	31	2	20.0288	24.3418	4	3	2	2	2	2	2	1	1	5	2	2	2	0	0	0	0
1	31	3	21.0498	20.2812	1	2	2	1	1	1	2	1	1	4	2	1	1	1	0	0	0
1	61	2	24.308	17.6464	4	7	2	2	2	2	2	1	1	5	1	2	2	0	1	0	0
0	45	2	25.2994	22.8928	4	2	2	2	2	2	2	1	1	5	2	1	1	1	0	0	0
1	61	1	22.7333	22.0386	4	4	2	2	2	2	2	1	1	5	2	1	1	1	0	0	0
1	68	3	26.2596	23.8754	4	2	2	2	2	1	2	1	1	4	1	1	1	1	0	0	0
0	35	3	20.1873	20.8117	3	3	2	2	2	2	2	2	2	4	2	2	2	0	0	0	0
0	52	2	27.852	25.7117	4	3	2	2	1	2	2	1	1	5	2	1	1	2	0	0	0
0	43	1	21.4031	20.5442	4	3	2	2	2	2	2	1	1	5	2	2	2	0	0	0	0
0	69	2	20	21.6413	4	2	2	2	1	1	2	1	1	3	1	2	2	0	0	0	0
1	35	3	31.2213	31.5886	4	4	2	2	2	2	2	1	2	4	2	2	2	0	0	0	0
0	47	2	27.8876	29.7913	3	3	2	2	1	2	2	1	1	5	2	1	1	1	1	0	0
0	60	2	21.0828	23.1911	5	3	2	2	1	2	2	1	1	4	1	1	1	1	0	0	0
1	37	1	21.4533	21.7993	4	3	2	2	2	2	2	1	1	4	2	2	2	0	0	0	0
1	49	1	21.4844	21.875	4	3	2	2	3	2	2	1	1	5	2	2	2	0	0	0	0
0	38	1	22.2222	22.2222	4	4	2	2	2	2	2	1	1	5	2	1	1	1	0	0	0
1	60	1	20.8117	24.0346	4	3	2	2	1	2	2	1	2	3	2	2	2	0	0	0	0
1	68	1	23.03	24.2215	4	2	2	2	1	2	2	1	2	4	2	2	2	0	0	0	0
0	58	2	17.4818	20.0288	4	4	2	2	1	2	2	2	2	4	2	2	2	0	0	0	0
0	71	2	19.4771	23.9224	3	4	5	2	2	2	2	1	1	3	2	1	1	1	0	0	0
0	53	1	24.974	26.0375	4	2	2	2	1	2	2	1	2	5	2	2	2	0	0	0	0
1	53	2	23.4375	26.0375	4	2	2	2	2	2	2	1	1	4	2	2	2	0	0	0	0
1	63	1	17.301	18.3768	4	4	2	2	1	2	2	1	1	5	2	2	2	0	0	0	0
1	59	1	19.721	20.7967	5	3	2	2	2	1	2	1	1	5	2	2	2	0	1	0	0
1	50	1	20.4152	20.7612	4	4	2	2	2	1	2	1	1	4	2	2	2	0	1	0	0
1	50	3	18.9292	21.9713	2	3	2	2	1	1	1	1	1	2	2	2	2	0	0	0	0
1	69	3	26.6728	22.5827	4	4	2	2	1	2	2	1	1	3	1	1	1	1	0	0	0
0	36	2	24.0346	20.4294	5	3	3	2	1	1	2	1	1	5	2	2	2	0	0	0	0
0	68	2	28.8889	23.8054	4	2	2	2	1	1	2	1	1	3	1	2	2	0	0	0	0
0	47	2	24.6548	22.6003	3	3	2	2	1	1	2	1	1	4	2	2	2	0	0	0	0
0	42	2	23.3091	18.4911	3	2	2	2	1	2	2	1	1	3	2	2	2	0	0	0	0
1	56	2	23.03	23.03	4	2	2	2	2	2	2	1	2	5	1	2	2	0	0	0	0
1	40	3	23.7228	20.0474	3	2	2	2	1	2	2	1	1	1	2	1	1	3	0	0	0
0	48	2	25	21.4844	5	4	2	2	2	2	2	1	1	5	2	1	1	3	0	0	0
0	64	2	14.5682	18.4911	5	3	2	2	1	2	2	1	1	5	1	2	2	0	0	0	0
0	54	2	27.3438	26.6728	4	3	2	2	1	2	2	1	1	5	1	2	2	0	0	0	0
1	41	1	23.1084	23.1084	4	5	2	2	1	1	2	2	2	2	2	1	1	1	0	0	0
0	52	2	25.3906	17.1468	3	4	4	5	2	3	2	1	1	5	2	2	2	0	0	0	0
0	52	3	27.0552	18.4911	3	2	2	2	1	2	3	1	1	4	2	2	2	0	0	0	0
1	34	3	23.0469	22.6562	2	1	4	5	1	2	2	1	2	4	2	2	2	0	0	0	0
1	50	1	21.83	21.3039	5	3	2	2	1	2	2	1	1	5	2	2	2	0	1	0	0
0	70	1	15.0216	21.4844	4	1	5	2	2	2	2	1	1	6	2	2	2	0	0	0	0
1	43	3	25.5102	24.2215	4	2	2	2	1	1	1	1	1	3	1	1	1	1	0	1	0
1	45	3	23.8751	23.4375	1	3	2	2	2	1	2	1	1	6	2	1	1	2	0	0	0
1	54	3	21.8647	18.5132	2	4	2	2	3	1	2	1	1	6	2	2	2	0	0	0	0
1	39	3	25.565	22.0932	3	3	2	2	2	1	2	1	1	5	2	1	1	1	0	1	0
1	48	1	20.061	17.5781	3	3	2	2	1	3	3	1	1	5	2	2	2	0	0	0	0
1	60	3	22.8625	21.5139	4	5	2	2	2	1	2	1	1	5	2	2	2	0	0	0	0
0	62	2	28.9216	19.5312	3	4	5	2	1	2	2	1	1	5	2	1	1	1	1	0	0
0	41	2	20.8117	18.2563	4	5	2	2	1	1	3	1	1	5	2	2	2	0	0	0	0
1	35	3	30.8594	20.9572	4	3	2	2	1	2	2	1	1	5	2	2	2	0	0	0	0
0	62	2	19.2234	16.6493	4	5	2	2	1	2	2	1	1	2	2	2	2	0	0	0	0
0	67	3	29.7913	24.3418	5	6	2	1	1	1	2	1	1	2	1	1	1	1	0	0	0
1	72	1	18.9318	22.0386	4	2	2	2	1	2	2	1	1	4	2	2	2	0	0	0	0
1	37	3	24.2123	20.6612	3	3	2	2	3	1	2	1	1	5	2	2	2	0	1	0	0
0	43	1	23.4221	19.7239	1	3	2	2	2	1	2	1	1	6	2	2	2	0	0	0	0
0	48	1	26.7094	22.6003	4	3	2	2	1	3	4	1	1	5	2	2	2	0	0	0	0
0	50	1	21.5045	19.1467	5	3	2	2	2	1	2	1	1	5	2	2	2	0	0	0	0
0	51	1	20.0288	22.0317	5	2	2	2	3	2	3	1	1	4	2	2	2	0	0	0	0
1	62	1	17.3611	21.2585	5	2	2	2	3	1	1	1	1	5	2	2	2	0	0	0	0
1	41	1	21.4844	23.4375	5	5	2	2	1	2	3	2	1	4	2	2	2	0	0	0	0
1	37	1	22.8625	24.677	4	2	1	2	1	1	3	2	2	6	2	2	2	0	0	0	0
1	34	1	22.0386	22.0386	5	2	2	2	3	1	1	1	1	3	2	2	2	0	0	0	0
0	48	2	24.4646	20.9572	3	3	2	2	1	1	3	1	1	3	1	2	2	0	0	0	0
1	61	1	19.8413	20.9042	5	7	2	3	1	1	3	1	1	6	2	2	2	0	0	0	0
1	69	2	27.5482	22.0386	5	4	2	2	2	1	2	1	1	5	2	1	1	2	0	0	0
1	58	3	22.231	21.5139	5	5	2	2	1	1	2	2	2	6	1	1	1	2	0	0	0
0	62	3	20.5688	18.132	3	5	2	2	1	1	2	1	1	3	2	2	2	0	0	0	0
1	46	3	22.4913	24.2215	3	3	2	2	1	1	2	1	1	5	2	2	2	0	0	0	0
1	58	3	19.1406	20.7031	4	3	2	2	1	1	2	1	1	4	2	2	2	0	0	0	0
0	52	2	28.1625	19.8141	3	2	2	2	2	1	2	1	1	4	1	2	2	0	0	0	0
0	56	1	27.3438	19.5312	5	5	2	2	1	1	2	1	1	5	2	2	2	0	1	0	0
0	69	2	25.8065	20.8117	4	3	2	2	1	2	2	1	1	5	2	1	1	1	0	0	0
1	34	2	18.3058	19.5682	3	4	2	2	2	1	1	1	1	5	2	2	2	0	0	0	0
1	50	1	22.3081	22.68	5	2	2	2	1	2	2	1	1	1	2	2	2	0	0	0	0
1	46	2	25.2826	19.3337	5	4	2	1	3	2	2	1	1	3	2	1	1	1	0	0	0
0	35	2	24.7768	23.4952	5	4	2	2	1	2	1	1	1	6	2	2	2	0	0	0	0
1	57	3	24.8016	23.7387	5	2	2	1	2	1	1	1	1	6	2	2	2	0	0	0	0
1	55	1	20.5191	24.2215	5	6	2	2	1	1	2	1	1	4	2	2	2	0	0	0	0
0	29	1	20.7967	20.7967	3	2	2	2	2	1	2	1	1	6	2	2	2	0	0	0	0
1	38	3	22.7732	16.5289	5	3	2	2	2	1	2	1	1	4	2	2	2	0	0	0	0
1	47	2	32.0073	24.0055	3	6	2	2	2	1	2	2	1	5	2	2	2	0	1	0	0
0	68	3	26.8352	17.9418	4	6	2	2	1	1	1	1	1	4	2	2	2	0	0	0	0
1	56	3	25.565	18.6214	5	4	2	2	1	1	2	1	1	3	2	2	2	0	0	0	0
0	64	1	24.974	20.3954	4	1	5	2	1	1	2	1	1	3	2	2	2	0	1	0	0
1	65	3	19.5312	21.4844	5	5	2	2	2	1	2	1	1	6	1	2	2	0	0	0	0
1	54	1	20.7612	22.4913	5	2	2	2	1	1	3	1	1	6	2	2	2	0	0	0	0
0	38	2	24.9135	22.4913	4	5	2	3	1	1	3	1	1	6	2	2	2	0	0	0	0
0	38	1	18.4911	25.8876	3	4	2	2	2	1	2	1	1	4	2	2	2	0	0	0	0
0	49	1	21.9261	23.1911	7	3	2	2	2	1	2	1	1	6	2	2	2	0	0	0	0
0	60	2	25.6369	21.4844	4	5	2	2	1	1	2	1	1	6	2	2	2	0	0	0	0
0	76	1	27.0552	24.974	4	1	4	3	1	1	2	1	1	5	2	2	2	0	0	0	0
1	40	3	21.6041	17.4747	3	3	2	3	3	1	3	1	2	6	2	1	1	1	0	0	0
1	39	3	22.913	23.7228	5	3	2	2	1	1	2	1	2	4	2	1	2	0	1	1	0
1	53	1	21.875	20.3125	4	2	2	2	1	1	3	2	2	6	2	2	2	0	0	0	0
0	56	3	24.1415	16.6493	3	5	2	2	2	1	2	1	1	3	1	2	2	0	0	0	0
1	57	2	22.7732	20.5693	3	2	2	2	2	2	2	1	1	5	1	1	1	1	0	0	0
1	58	1	21.0772	20.202	5	6	2	2	1	1	3	1	1	1	2	2	2	0	0	0	0
1	72	3	19.8413	20.727	3	2	2	2	2	1	2	1	1	5	2	1	1	3	0	0	0
1	54	3	29.0318	21.7738	3	3	2	2	1	2	2	1	1	5	2	1	1	1	1	0	0
1	42	3	21.0077	18.3817	3	3	2	2	1	2	2	1	1	5	2	1	1	1	0	0	0
1	39	1	25.1808	19.3698	3	3	2	2	3	1	3	1	1	6	2	2	2	0	0	0	0
1	51	2	26.6097	18.9069	4	2	2	2	1	3	2	1	1	3	2	2	2	0	0	0	0
1	53	1	20.5761	21.875	4	3	2	2	2	1	2	1	1	4	2	1	1	1	0	0	0
1	63	3	29.2969	23.4375	3	5	2	2	1	1	2	1	1	4	2	1	1	2	1	0	0
1	37	1	26.0262	20.8209	4	6	2	2	1	2	2	1	1	4	2	1	1	1	0	1	0
1	55	3	26.2976	19.0311	5	6	2	2	1	1	2	1	2	3	1	1	1	1	0	0	0
0	38	1	24.974	27.0552	5	3	2	2	1	2	2	1	1	3	2	1	1	1	0	0	0
0	60	3	23.0469	20.1172	3	1	5	5	1	1	2	1	1	5	1	1	1	1	0	0	0
1	32	1	25.5102	20.5499	5	5	2	2	2	1	2	1	1	5	2	1	1	1	0	0	0
1	69	2	27.7323	26.7299	4	2	3	2	1	1	2	1	1	3	1	1	1	2	1	0	0
0	67	3	23.0469	23.4375	5	2	2	2	2	1	2	1	1	5	1	1	1	1	0	0	0
1	52	3	20.4529	21.9138	4	3	2	2	1	2	2	2	2	4	2	1	1	1	0	0	0
0	57	3	25.2994	24.4444	3	5	2	2	1	2	2	1	1	4	1	1	1	1	0	0	0
0	45	3	20.0288	20.83	2	2	2	2	1	1	2	1	1	5	2	1	1	1	0	0	0
1	32	3	23.3067	22.1443	3	3	2	2	1	2	2	1	1	4	2	1	1	1	0	0	0
0	70	3	30.2978	23.8054	3	1	5	2	1	1	2	1	1	5	2	1	1	1	0	0	0
0	61	2	26.7094	28.764	5	5	2	2	2	1	2	1	1	5	2	1	1	1	0	0	0
1	55	1	21.2306	20.3125	4	9	2	2	2	2	2	1	1	5	2	2	2	0	0	0	0
0	57	2	26.6728	25.7117	5	4	2	2	1	3	2	1	1	2	2	1	1	1	0	0	0
0	55	2	28.578	13.3364	5	5	2	2	1	1	2	1	1	5	2	1	1	3	0	0	0
0	73	2	28.8044	24.3418	5	2	2	2	1	2	2	1	1	4	2	1	1	1	0	0	0
0	51	2	22.0386	20.5693	5	1	5	2	1	1	2	1	1	6	2	1	1	1	2	0	0
0	46	1	23.1911	21.0828	5	5	5	2	3	1	3	1	2	5	2	2	2	0	0	0	0
0	50	1	21.4286	24.1127	4	6	2	2	2	2	3	1	1	5	2	2	2	0	0	0	0
1	39	3	22.5878	17.301	5	3	2	2	1	3	2	1	1	3	2	2	2	0	1	0	0
0	30	1	23.3056	24.2568	4	3	2	2	2	2	2	1	1	5	2	2	2	0	0	0	0
0	30	2	23.4375	22.8624	5	3	2	2	1	2	2	2	2	5	2	2	2	0	0	0	0
0	51	3	27.4077	23.1111	4	2	2	2	1	1	2	1	1	3	2	2	2	0	0	0	0
1	45	1	23.4375	22.0386	4	3	2	2	1	2	2	2	2	5	2	2	2	0	0	0	0
1	38	1	20.7612	22.4913	4	5	2	2	2	2	2	1	1	6	1	2	2	0	0	0	0
0	33	2	21.0828	23.1911	5	3	2	2	1	2	2	1	1	2	2	2	2	0	0	0	0
0	48	3	22.2222	19.4771	4	4	2	2	1	2	2	1	1	5	2	2	2	0	0	0	0
1	53	1	21.7738	21.7738	4	2	2	2	1	2	2	1	1	5	2	1	1	1	2	0	0
0	56	2	20.7756	19.2234	4	2	2	2	2	2	2	1	1	4	2	1	1	1	0	0	0
1	35	2	28.578	29.3848	4	4	2	2	2	2	2	1	1	5	2	2	2	0	1	0	0
1	67	3	26.2188	19.487	5	2	2	2	1	1	2	1	1	4	1	1	1	1	0	0	0
0	70	2	26.8386	24.0346	4	4	5	2	1	2	2	1	1	4	1	1	1	1	1	0	0
0	52	1	20.8117	20.8117	4	3	2	2	1	2	2	1	2	4	2	1	1	2	0	0	0
1	40	2	20.9573	24.0569	4	4	2	2	1	2	2	1	2	5	2	2	2	0	0	0	0
1	60	3	26.449	17.7557	4	4	4	4	2	2	2	1	1	5	1	2	2	0	0	0	0
0	33	1	22.6003	22.6003	4	3	2	2	2	2	2	1	1	5	2	2	2	0	0	0	0
0	58	3	17.898	20.2395	3	3	2	2	2	2	2	1	1	2	1	2	2	0	0	0	0
0	66	1	20.8117	20.8117	4	6	2	2	2	2	2	1	1	5	2	2	2	0	0	0	0
0	33	2	20.9366	22.5827	5	5	2	2	2	2	2	1	1	4	2	2	2	0	0	0	0
0	41	2	18.7783	17.3611	3	5	2	2	3	2	2	1	1	2	2	2	2	0	0	0	0
1	50	3	24.623	20.5191	2	2	2	2	2	2	2	1	1	2	2	2	2	0	0	0	0
0	51	3	23.833	20.8117	4	3	2	2	2	2	2	1	1	5	1	2	2	0	0	0	0
0	53	3	22.0317	19.7777	4	3	2	2	1	2	2	1	1	5	1	1	1	1	0	0	0
1	62	3	25.9516	23.3234	4	2	4	3	2	2	2	1	2	5	1	1	1	0	0	0	0
1	49	1	21.9713	20.7612	4	3	2	2	2	2	2	1	1	5	2	2	2	0	1	0	0
0	57	2	20.149	19.5312	4	2	2	2	1	2	2	1	1	2	1	2	2	0	0	0	0
1	48	1	20.8117	20.2848	4	3	2	2	2	2	2	1	1	5	2	2	2	0	0	0	0
1	63	1	24.8971	27.4406	4	2	2	2	1	2	2	1	1	5	1	2	2	0	0	0	0
1	62	2	20.4152	21.9713	4	6	2	2	2	2	2	1	1	5	2	2	2	0	0	0	0
0	61	1	19.2234	23.1911	4	2	2	2	1	2	2	1	1	4	2	2	2	0	1	0	0
0	48	1	22.8928	20.0777	4	2	2	2	1	2	2	1	1	5	2	2	2	0	1	0	0
0	54	1	20.7967	21.5139	5	2	2	3	1	1	2	1	1	4	2	1	1	1	1	0	0
1	47	2	22.4913	21.4533	5	3	2	2	1	1	2	1	1	4	2	1	1	1	0	0	0
0	34	2	19.1467	17.4818	5	3	2	2	1	1	2	1	1	5	2	2	2	0	1	0	0
0	59	2	25.721	21.0828	4	6	2	2	1	3	2	1	1	3	1	1	1	1	1	0	0
1	69	1	20.7612	17.9931	7	3	2	2	1	1	2	1	1	5	2	2	2	0	0	0	0
0	52	3	30.1103	20.7008	2	2	2	2	1	1	2	1	1	2	2	1	1	1	0	0	0
0	47	3	23.4375	19.5312	3	2	2	2	1	1	2	1	1	5	2	1	1	1	0	0	0
0	68	3	19.2277	19.7777	4	2	2	2	2	2	2	1	1	5	2	2	2	0	0	0	0
1	56	3	22.5827	26.0262	4	4	2	2	1	1	2	2	2	5	2	2	2	0	0	0	0
0	60	2	26.3702	21.7555	3	1	2	2	1	2	2	1	1	5	2	2	2	0	0	0	0
1	56	3	24.5089	21.9713	4	2	2	2	2	2	2	1	2	4	2	2	2	0	0	0	0
1	47	2	25.9516	27.0416	4	3	2	2	1	2	2	1	1	5	1	2	2	0	0	0	0
0	40	1	28.4444	21.3593	4	4	2	2	2	2	2	1	1	3	2	2	2	0	0	0	0
0	47	1	24.8358	27.0552	4	4	2	2	3	2	2	1	1	5	2	2	2	0	0	0	0
1	64	1	18.8189	20.202	4	1	4	4	2	2	2	1	2	2	2	2	2	0	0	0	0
1	31	1	19.1001	20.202	5	4	2	2	1	1	2	1	1	4	2	2	2	0	1	0	0
0	57	1	20.7031	22.8624	4	2	2	2	2	2	2	1	2	3	2	2	2	0	0	0	0
0	58	2	20.8949	25.6312	4	6	2	2	1	2	2	1	1	5	2	2	2	0	0	0	0
1	49	2	25.0995	22.4913	4	3	2	2	1	2	3	1	1	5	2	2	2	0	0	0	0
0	51	3	26.5625	20.3125	5	7	2	2	1	2	2	1	1	5	2	2	2	0	1	0	0
0	60	1	25.9695	19.4771	3	4	2	2	1	1	2	1	1	3	2	2	2	0	0	0	0
0	48	1	19.7239	19.2277	4	4	2	2	2	2	2	1	1	4	2	2	2	0	0	0	0
0	52	3	25.5296	22.5827	5	2	2	2	2	1	2	1	1	5	1	2	2	0	0	0	0
1	33	2	16.5289	20.202	3	6	2	2	3	2	2	1	1	4	2	2	2	0	0	0	0
1	43	2	24.8016	17.7154	5	2	2	2	2	2	2	1	1	4	2	2	2	0	1	0	0
1	49	1	17.7154	18.424	5	4	2	2	2	1	2	1	1	4	2	2	2	0	0	0	0
1	39	2	21.9713	21.9713	3	3	2	2	1	2	3	1	1	5	2	2	2	0	0	0	0
1	51	3	19.487	22.3214	3	3	2	2	2	1	2	1	1	5	2	1	1	1	0	0	0
1	31	3	23.1837	23.5102	2	3	2	2	2	2	3	1	1	4	1	2	2	0	1	0	0
1	59	3	20.7612	22.4913	3	3	2	2	2	1	2	1	1	5	1	1	1	0	0	0	0
1	71	2	15.0555	20.7612	3	2	2	2	1	2	2	1	1	3	2	2	2	0	0	0	0
1	60	3	24.2215	22.4913	2	2	2	2	1	1	2	1	1	5	2	2	2	0	0	0	0
1	66	3	23.5102	26.1224	1	5	2	2	1	2	2	1	1	4	2	1	1	3	0	0	0
1	38	2	23.8751	23.8751	4	4	2	2	1	2	2	1	1	5	2	2	2	0	0	0	0
1	46	3	22.4913	22.4913	3	3	2	2	2	2	2	1	1	5	1	1	1	1	0	0	0
0	56	3	29.2969	25.0762	2	6	2	2	3	3	2	1	1	5	2	1	1	3	1	0	0
0	40	3	22.3133	20.2848	2	3	2	2	1	2	3	1	2	4	2	2	2	0	0	0	0
0	57	2	20.0288	17.5781	4	2	2	2	1	1	2	1	1	4	1	1	1	2	1	0	0
0	36	3	20.3125	20.3125	3	3	2	2	1	2	2	1	1	5	2	2	2	0	0	0	0
0	48	1	21.2585	21.2585	5	2	2	2	2	1	2	1	1	3	2	2	2	0	0	0	0
1	31	2	22.8624	18.2899	3	4	2	2	1	2	2	1	1	5	2	2	2	0	0	0	0
0	36	1	19.3962	23.1911	5	4	2	2	2	2	2	1	1	5	2	2	2	0	0	0	0
0	61	1	26.0375	24.0346	5	1	5	2	2	2	2	1	1	3	2	2	2	0	0	0	0
1	31	1	23.03	19.487	5	3	2	2	1	1	2	1	1	4	2	2	2	0	0	0	0
1	45	1	21.9671	21.2585	5	4	2	2	2	2	2	1	1	5	2	2	2	0	0	0	0
1	65	2	23.6614	21.2245	4	2	2	2	1	1	2	1	1	3	1	2	2	0	0	0	0
0	57	2	29.9688	29.2101	4	3	2	2	1	2	2	1	1	4	2	2	2	0	0	0	0
1	37	2	22.3214	23.03	4	3	2	2	2	2	2	1	1	5	2	2	2	0	0	0	0
0	53	1	26.9127	23.1911	5	2	2	2	1	1	2	1	1	5	2	2	2	0	0	0	0
1	62	2	18.3655	19.487	4	2	2	2	2	1	2	1	1	2	2	2	2	0	0	0	0
1	59	1	18.8271	18.4265	5	4	2	2	2	2	2	1	1	5	2	2	2	0	2	0	0
0	44	3	20.8117	23.3091	3	6	2	2	2	2	2	1	1	4	2	2	2	0	0	0	0
1	63	1	16.1415	19.3698	5	2	2	2	3	1	2	1	1	3	2	2	2	0	0	0	0
1	45	1	19.0311	19.0311	4	4	2	2	1	2	2	1	1	5	2	2	2	0	0	0	0
1	50	1	20.6193	20.6193	4	3	2	2	2	2	2	1	1	5	2	2	2	0	0	0	0
0	49	3	20.0288	20.0288	3	3	2	2	1	2	2	1	2	6	2	1	1	1	0	0	0
1	40	2	23.8754	23.8754	3	3	2	2	2	2	3	1	1	5	2	2	2	0	0	0	0
1	56	1	21.4533	20.7612	5	2	2	2	3	1	2	1	1	5	2	2	2	0	0	0	0
1	35	1	17.5781	17.9688	4	4	2	2	1	2	2	1	1	3	2	2	2	0	0	0	0
0	52	1	18.1312	21.5045	5	6	2	2	1	2	2	2	2	5	2	2	2	0	0	0	0
0	52	2	20.5457	20.83	4	3	2	2	1	2	2	1	1	5	2	2	2	0	0	0	0
1	68	2	26.0375	21.7555	4	2	2	2	1	2	2	2	2	4	1	1	1	1	0	0	0
0	58	2	30.2978	25.9695	5	4	2	2	1	2	2	1	1	4	1	1	1	1	0	0	0
1	51	2	23.3844	24.8016	3	3	2	2	1	2	2	1	1	3	2	2	2	0	1	0	0
0	55	2	19.1467	19.313	4	4	2	2	1	2	2	2	2	5	1	1	1	1	0	0	0
1	39	1	22.4913	20.7612	4	5	2	2	1	1	2	1	1	5	2	2	2	0	0	0	0
1	53	1	21.2585	15.5709	4	4	2	2	2	2	2	1	1	5	2	1	1	1	0	0	0
1	39	1	18.3655	20.5693	5	2	5	2	1	2	2	1	1	4	2	2	2	0	0	0	0
1	32	1	21.875	22.6562	4	4	2	2	2	2	2	1	1	5	2	2	2	0	0	0	0
0	54	3	23.6244	22.5827	5	5	2	2	1	2	2	2	2	4	2	2	2	0	1	0	0
1	68	3	30.863	30.1194	4	2	2	2	2	2	2	2	2	5	2	1	1	1	0	0	0
0	30	1	22.6003	22.1893	5	6	2	2	1	1	2	2	2	5	2	2	2	0	0	0	0
0	35	2	24.2188	17.5781	4	5	2	2	1	1	2	1	1	2	2	2	2	0	0	0	0
0	38	1	26.5625	25.3906	4	5	2	2	2	2	3	1	1	5	2	2	2	0	0	0	0
0	67	2	17.7999	19.5312	4	5	5	2	2	2	2	1	1	6	2	2	2	0	0	0	0
0	54	2	22.6003	24.0346	3	2	2	2	1	3	1	1	1	4	1	1	1	2	0	0	0
1	50	1	19.8141	20.4491	4	5	2	2	1	2	3	1	1	4	2	2	2	0	0	0	0
0	58	2	22.8928	22.8329	5	3	2	2	2	2	2	1	1	3	1	1	1	1	0	0	0
0	66	3	24.0346	17.5781	4	2	2	2	1	1	3	1	1	2	1	2	2	0	0	0	0
0	48	1	22.0317	18.591	3	3	2	2	2	1	1	1	1	5	2	2	2	0	0	0	0
1	48	3	22.1453	22.4913	3	2	2	2	2	1	2	1	1	5	2	2	2	0	0	0	0
1	39	2	18.2899	20.5761	5	1	1	2	1	1	2	1	1	2	2	2	2	0	1	0	0
1	40	1	21.9671	23.03	5	3	2	2	2	2	2	1	1	5	2	2	2	0	0	0	0
1	36	1	19.5682	20.1995	5	4	2	2	2	2	2	1	1	5	2	2	2	0	0	0	0
0	50	1	24.1965	20	5	5	2	2	2	2	2	1	1	3	2	2	2	0	0	0	0
1	31	2	19.3098	23.03	4	5	2	2	2	2	2	1	1	5	1	2	2	0	0	0	0
0	48	3	24.6548	23.2335	4	2	2	2	1	2	2	2	2	4	2	1	1	1	0	1	0
1	63	1	19.0311	19.5918	5	2	2	2	1	1	2	1	1	3	2	2	2	0	0	0	0
0	68	3	28.8889	25.9695	3	2	5	2	1	2	2	1	1	5	2	1	1	1	0	0	0
0	52	1	28.3039	26.7094	4	2	2	2	1	2	2	1	1	3	2	2	2	0	0	0	0
0	65	2	27.4714	19.1467	5	4	5	2	2	2	2	1	1	3	1	1	1	1	0	0	0
1	49	3	24.977	19.8347	2	5	2	2	2	2	2	1	1	5	2	1	1	1	0	0	0
1	40	1	22.5827	23.8751	4	4	2	2	2	2	2	1	1	5	2	2	2	0	0	0	0
0	70	2	19.4771	21.0828	2	2	2	2	2	2	2	1	1	3	2	2	2	0	0	0	0
0	35	2	21.4844	20.3125	3	3	2	2	2	1	2	1	1	4	1	2	2	0	0	0	0
1	46	2	17.7154	19.487	4	4	2	2	2	2	2	1	1	5	2	2	2	0	0	0	0
1	66	1	25.4028	26.5731	4	2	2	2	1	2	2	1	1	4	2	2	2	0	0	0	0
1	70	2	21.8776	21.7776	4	5	2	2	1	1	2	1	1	5	1	2	2	0	0	0	0
1	57	2	25.0995	21.5139	5	5	2	2	2	3	2	1	1	3	2	2	1	2	0	0	0
0	47	1	24.6548	20.1348	5	2	2	2	1	1	2	1	1	5	2	2	2	0	0	0	0
0	71	2	21.5729	19.5312	4	2	2	2	1	2	2	1	1	2	2	2	2	0	0	0	0
1	48	3	22.231	21.5139	3	2	2	3	2	2	2	1	1	5	2	1	1	1	0	0	0
0	66	2	18.7305	20.2848	4	2	2	2	1	2	2	2	1	4	2	2	2	0	0	0	0
1	61	3	26.5731	24.2215	4	2	2	2	1	2	2	1	1	2	1	1	1	2	0	0	0
1	50	3	25.1559	21.2585	3	3	2	2	2	1	2	1	1	3	2	1	1	3	0	0	0
1	61	2	22.8928	20.0288	5	5	2	2	1	2	2	1	1	5	1	2	2	0	0	0	0
0	57	1	21.3593	16.6493	4	5	2	2	2	2	3	1	1	2	2	2	2	0	0	0	0
1	53	1	26.3465	22.0386	4	6	2	2	1	2	3	2	2	3	2	2	2	0	0	0	0
0	66	2	20	21.9289	5	6	2	2	1	2	2	1	1	4	2	2	2	0	0	0	0
0	41	3	25.1534	18.5178	2	3	2	2	1	1	2	1	1	4	2	2	2	0	1	0	0
0	71	3	27.3923	26.6667	5	3	2	2	1	2	2	1	1	1	1	2	2	0	0	0	0
1	55	2	22.7709	20.202	4	6	2	2	2	2	2	1	1	4	2	2	2	0	0	0	0
0	57	1	21.6855	20.2694	5	2	2	2	1	1	2	1	1	4	2	2	2	0	0	0	0
0	50	2	21.6413	19.91	5	2	2	2	2	2	2	1	1	4	2	2	2	0	1	0	0
1	54	2	23.7812	22.8571	4	2	2	2	2	2	2	1	1	5	2	1	1	1	0	0	0
0	58	1	18.4911	20.0288	4	2	2	2	1	2	3	1	1	5	2	1	1	1	0	0	0
0	48	1	33.1777	22.8624	3	2	2	2	1	1	3	2	1	4	2	2	2	0	1	0	0
1	34	2	20.7612	19.0311	5	3	1	2	2	1	2	1	2	6	1	2	2	0	0	0	0
1	62	1	18.5901	23.0518	4	2	2	2	2	3	3	1	2	3	2	2	2	0	0	0	0
0	44	1	19.4734	24.3418	5	3	2	2	1	1	2	1	1	6	2	2	2	0	0	0	0
1	57	2	16.2331	20.3125	4	2	2	2	1	1	4	1	2	3	2	2	2	0	0	0	0
1	48	1	20.9573	18.5911	4	3	2	2	1	2	2	1	1	3	2	1	1	1	0	0	0
0	30	1	23.9224	19.6506	5	5	2	2	2	1	2	1	2	5	2	2	2	0	0	0	0
1	32	1	23.03	23.03	5	4	2	2	1	1	3	1	1	6	2	1	1	1	0	0	0
1	28	1	19.8141	19.8141	4	5	2	2	1	1	1	1	1	6	2	2	2	0	0	0	0
1	55	3	24.0346	19.7777	3	3	2	2	2	2	2	1	1	3	2	2	2	0	0	0	0
0	45	1	26.0375	24.0346	5	3	2	2	3	2	2	1	1	3	2	2	2	0	0	0	0
1	70	2	22.0386	23.3067	4	4	3	2	1	2	2	1	1	3	1	2	2	0	0	0	0
0	52	3	19.7239	18.4911	2	1	2	2	2	2	2	1	1	4	1	2	2	0	0	0	0
1	72	1	17.0068	21.2585	5	2	2	2	1	1	2	1	1	5	2	1	1	1	0	0	0
1	63	3	16.6525	18.6012	2	2	2	2	3	2	2	1	1	1	2	1	1	1	0	0	0
0	61	3	22.0317	21.7555	4	2	2	2	2	2	2	1	1	5	2	2	2	0	0	0	0
1	62	1	23.4375	23.2434	4	5	2	2	1	1	2	1	1	5	2	2	2	0	0	0	0
0	48	2	25.711	25	3	4	2	2	1	3	2	1	1	3	1	2	2	0	0	0	0
1	55	3	22.8571	22.2041	3	2	2	2	1	2	2	1	1	5	2	2	2	0	0	0	0
0	49	3	18.6667	18.6667	4	3	2	2	1	1	3	1	1	5	2	2	2	0	1	1	0
0	69	2	17.0656	20.5457	5	2	2	2	3	3	3	1	1	3	2	2	2	0	1	0	0
0	36	1	21.7784	20.2848	5	3	3	2	1	1	2	2	1	2	2	2	2	0	0	0	0
0	53	2	20.3125	21.4844	5	5	2	2	1	2	3	1	1	3	1	2	2	0	0	0	0
1	33	2	23.5102	22.2041	5	5	2	2	1	3	3	1	2	1	2	2	2	0	0	0	0
0	60	2	21.6413	22.7694	4	3	5	4	2	2	2	1	2	4	1	1	1	2	1	0	0
1	62	3	23.5078	23.8751	3	5	2	2	2	1	2	1	1	5	2	2	2	0	0	0	0
1	49	2	23.3844	23.03	3	2	2	3	2	2	2	2	2	6	2	2	2	0	0	0	0
1	58	1	20.0474	21.4692	5	3	2	3	1	1	2	1	1	3	2	2	2	0	0	0	0
0	60	1	20.8889	22.2222	5	2	2	3	2	3	3	1	1	3	2	2	2	0	0	0	0
1	78	2	19.5965	21.6128	3	3	2	2	3	2	2	1	1	2	2	2	2	0	0	0	0
0	69	1	21.3675	23.1247	4	4	2	3	1	3	2	1	1	3	1	2	2	0	0	0	0
1	47	1	20.0692	20.7612	4	3	2	2	2	1	2	1	1	5	2	1	1	1	0	0	0
1	30	1	21.0077	22.7583	4	3	2	2	3	3	2	1	1	5	2	2	2	0	1	1	0
1	58	1	20.2812	23.6614	4	5	2	2	1	1	2	1	1	4	2	2	2	0	0	0	0
0	48	2	23.8054	23.8054	3	3	2	2	1	3	2	1	1	4	2	2	2	2	0	0	0
1	32	2	29.6875	22.6562	4	4	2	2	1	2	2	1	1	5	1	2	2	0	0	1	0
0	51	1	19.9792	23.3091	5	6	2	2	2	1	2	1	1	4	2	2	2	0	0	0	0
0	35	1	23.1911	18.1312	4	4	2	2	2	1	2	2	1	5	2	2	2	0	0	0	0
1	53	2	24.3375	18.5911	3	4	2	2	2	1	2	1	1	5	2	2	2	0	1	0	0
1	37	1	18.8189	20.5126	4	6	2	2	3	3	2	1	1	5	2	2	2	0	0	0	0
1	52	3	17.7154	19.487	4	3	2	2	1	2	2	1	1	4	2	1	1	1	1	1	0
0	44	2	23.5304	20.2848	4	4	2	2	1	2	2	1	1	4	2	2	2	0	0	0	0
1	51	1	20.9573	22.4913	5	4	2	2	1	2	2	1	1	2	2	2	2	0	0	0	0
0	51	2	20.4467	28.578	4	2	5	2	1	2	2	1	1	5	1	2	2	0	0	0	0
0	51	1	25.5588	24.7475	5	5	2	2	1	2	2	1	1	3	2	2	2	0	0	0	0
1	70	3	23.6614	20.0474	4	2	2	2	2	1	2	1	1	3	2	1	1	1	0	1	0
1	47	1	23.8751	22.0386	5	5	2	2	2	2	2	1	1	1	2	2	2	0	0	0	0
1	58	3	22.1443	19.487	4	2	2	2	3	1	2	1	1	5	2	2	2	0	0	0	0
0	64	2	26.6667	23.8054	3	2	2	2	2	2	2	1	1	4	2	2	2	0	0	0	0
1	70	2	24.6094	22.8624	4	2	2	2	2	2	2	2	2	2	1	1	1	1	1	0	0
0	38	2	21.9076	18.2563	4	2	2	2	1	1	2	2	2	4	2	2	2	0	0	0	0
1	31	1	20.9572	22.8624	4	3	2	2	1	2	3	1	2	6	2	2	2	0	0	0	0
1	47	3	24.7721	22.9854	4	4	2	2	2	2	3	1	1	6	2	2	2	0	1	0	0
1	67	2	31.5115	28.0102	4	4	2	2	2	2	2	1	1	6	2	1	1	1	1	0	0
0	54	3	19.1406	22.6562	3	3	2	2	1	1	3	1	1	3	1	1	1	1	0	0	0
1	34	1	22.5827	21.875	5	4	2	2	3	3	2	1	1	3	2	2	2	0	1	0	0
0	64	2	24.6548	21.3675	3	2	2	3	1	2	2	2	2	5	2	2	2	0	1	0	0
1	45	2	23.6713	23.6614	4	3	2	2	2	1	2	1	1	5	2	2	2	0	0	0	0
0	61	2	21.875	23.4375	5	8	2	2	3	1	2	1	1	5	1	1	1	1	1	0	0
0	52	2	23.6244	19.052	4	2	1	3	1	1	4	2	2	6	2	2	2	0	0	0	0
1	68	2	22.5827	20.7008	1	4	5	2	2	1	1	2	2	6	2	2	2	0	2	0	0
0	46	2	22.8928	20.8117	3	4	1	1	1	3	2	1	1	4	2	2	2	0	0	0	0
0	45	3	19.0677	18.2563	3	3	2	2	2	1	3	1	1	4	2	2	2	0	0	1	0
1	30	1	27.31	23.4586	2	3	2	2	1	1	2	1	1	5	2	2	2	0	0	0	0
0	69	1	18.75	18.2899	5	6	5	2	1	1	2	2	2	2	2	1	1	2	0	2	0
1	37	3	22.2656	17.5781	3	3	2	2	1	1	1	1	1	5	2	2	2	0	0	0	0
1	57	1	19.4674	22.0386	2	2	2	2	3	1	3	1	1	6	2	2	2	0	0	0	0
1	55	3	27.3438	23.4375	2	3	2	2	1	1	1	1	1	6	2	1	1	2	1	0	0
1	43	1	22.0386	22.0386	4	3	2	2	2	1	3	1	1	5	2	2	2	0	0	0	0
1	29	1	20.7612	20.7612	5	1	1	2	1	1	2	1	1	3	2	1	1	1	0	0	0
1	60	1	18.424	21.2585	4	3	2	2	2	2	2	1	1	1	2	1	1	1	0	0	0
0	41	1	27.0993	22.5827	5	4	2	2	1	1	2	1	1	4	2	1	1	1	0	0	0
0	72	3	17.1468	20.9572	4	2	2	2	2	2	2	1	1	6	1	1	1	2	0	0	0
1	64	3	22.5482	20.3074	2	5	2	2	1	1	2	1	1	1	2	1	1	2	0	0	0
1	36	2	30.4705	18.6012	3	3	2	2	3	1	2	1	1	5	2	1	1	1	0	0	0
0	44	1	24.974	22.8928	2	3	2	2	1	1	2	1	1	4	2	2	2	0	0	0	0
1	58	3	28.578	22.8624	2	1	4	5	2	1	2	1	1	5	2	1	1	2	0	0	0
0	50	1	22.0741	20.7756	4	4	2	2	1	1	2	1	1	3	2	2	2	0	0	0	0
1	54	1	22.4913	20.7612	5	2	2	2	1	1	2	1	1	5	2	2	2	0	0	0	0
1	61	1	20.202	18.3655	5	5	2	2	1	1	2	1	1	3	2	1	1	1	0	0	0
1	57	1	19.2894	20.061	5	5	1	2	1	1	3	1	1	6	2	2	2	0	0	0	0
1	67	1	19.8413	21.2585	4	4	2	2	1	1	2	1	1	5	2	1	1	2	0	0	0
0	37	1	21.3675	26.8352	4	4	2	2	2	2	2	1	1	5	2	2	2	0	0	0	0
0	68	1	22.6003	24.6548	4	3	2	2	1	1	2	1	1	3	2	2	2	0	0	0	0
0	58	1	19.1406	20.3125	4	3	2	2	1	1	2	1	1	3	2	2	2	0	0	0	0
1	44	1	20.5191	22.2291	4	6	2	2	2	1	2	1	1	3	2	2	2	0	0	0	0
0	49	2	23.6328	25.3906	4	4	2	2	1	2	2	1	1	4	2	2	2	0	0	0	0
0	42	2	33.2031	20.7031	4	2	4	5	1	1	2	2	2	6	2	2	2	0	0	0	0
1	34	2	25.9516	19.3772	3	3	2	2	2	2	2	1	1	5	2	2	2	0	0	0	0
1	53	2	18.3655	21.7738	5	3	2	3	3	2	3	1	2	3	2	2	2	0	0	0	0
0	55	3	21.0938	17.9688	4	3	2	2	1	2	2	1	1	6	1	2	2	0	0	0	0
1	34	1	20.0692	20.7612	3	4	2	2	1	1	2	1	1	5	2	2	2	0	0	0	0
0	38	1	22.0604	19.9792	5	3	2	2	1	1	2	1	1	2	2	2	2	0	0	0	0
1	45	1	30.8248	21.9671	5	4	2	2	1	1	2	1	1	6	2	2	2	0	0	0	0
1	60	2	23.03	24.5089	5	7	2	2	1	1	3	1	1	4	1	2	2	0	1	0	0
0	37	1	23.8751	22.0386	3	3	2	2	1	3	2	1	1	4	2	2	2	0	0	0	0
1	40	1	19.3772	20.7612	4	4	2	2	1	1	1	1	1	5	2	2	2	0	0	0	0
1	44	2	26.2976	20.7612	5	3	2	2	3	1	2	1	1	5	2	2	2	0	0	0	0
0	47	2	25.0762	15.4315	3	3	2	2	2	1	2	1	1	6	2	1	1	1	1	1	0
0	44	1	18.75	19.5312	5	2	2	2	2	1	2	1	1	3	2	2	2	0	0	0	0
0	59	2	24.1415	18.026	3	6	2	2	1	2	2	2	2	5	2	2	2	0	0	0	0
1	72	2	18.6012	21.2585	3	2	2	2	1	1	2	1	1	2	2	1	1	1	0	0	0
0	53	1	19.9792	22.3133	4	2	2	2	2	2	2	1	1	5	2	2	2	0	0	0	0
0	43	1	21.0938	25.3906	5	2	2	2	2	2	2	1	1	5	2	1	1	1	0	0	0
1	48	2	23.6614	21.9713	4	4	2	2	2	2	2	1	1	4	2	2	2	0	0	0	0
0	60	2	23.2335	19.7777	4	5	2	2	1	2	2	1	1	4	1	2	2	0	0	0	0
1	51	1	22.6003	23.833	4	3	2	2	1	2	2	2	2	5	2	2	2	0	0	0	0
1	34	1	18.6709	18.6709	4	4	2	2	2	2	2	2	2	5	2	2	2	0	0	0	0
1	54	1	18.424	25.3906	5	5	2	2	1	1	2	1	1	5	2	2	2	0	1	0	0
1	33	3	25.0593	25.0593	3	5	2	2	1	2	2	1	1	5	2	2	2	0	0	0	0
0	48	3	26.8386	26.0375	4	4	3	2	1	2	2	1	1	5	1	2	2	0	0	0	0
1	32	2	18.3391	18.3391	5	3	2	2	1	3	2	1	1	5	2	2	2	0	0	0	0
0	64	2	25.7812	22.8624	3	2	2	2	1	2	2	2	2	5	2	1	1	2	0	0	0
1	45	3	21.7181	22.7204	2	3	2	2	1	2	2	1	1	4	2	2	2	0	0	0	0
0	51	3	22.2222	20.7756	4	3	2	2	3	2	2	1	1	4	2	2	2	0	1	0	0
1	53	1	24.093	21.2585	5	4	2	2	2	1	2	1	1	1	2	1	1	1	0	0	0
1	55	1	19.1512	20.2812	7	2	2	2	1	1	2	2	1	3	2	1	1	1	0	0	0
0	70	3	21.8522	18.7305	5	2	2	2	1	1	2	1	1	5	1	1	1	1	0	0	0
1	66	3	24.7676	21.7193	4	3	3	2	2	1	2	1	1	5	2	1	1	1	1	0	0
0	61	1	23.0469	20.7008	2	3	2	2	3	1	2	1	1	6	2	1	1	1	0	0	0
0	67	3	18.9745	21.0828	5	2	2	2	1	1	2	1	1	3	2	1	1	1	0	0	0
0	56	1	20	22.2222	5	6	2	2	3	1	2	1	2	2	2	1	1	1	0	0	0
0	59	3	20.0288	17.9688	5	2	2	2	1	1	3	1	2	2	1	1	1	1	2	0	0
0	49	1	27.0552	22.8928	5	3	2	2	2	1	2	1	1	6	1	1	1	1	0	1	0
1	48	1	19.257	18.2066	5	5	2	2	1	1	2	1	1	2	2	2	2	0	0	0	0
0	45	1	20.4444	20.4444	1	3	2	2	1	1	2	1	1	5	2	2	2	0	0	0	0
1	35	1	25.7117	19.4674	5	3	2	2	2	1	2	1	1	5	2	2	2	0	0	0	0
0	59	1	29.0418	21.4844	5	3	2	3	3	3	3	1	1	5	2	2	2	0	0	0	0
1	39	1	22.0386	23.1405	5	4	2	2	3	1	2	1	1	4	2	1	1	1	0	0	0
1	46	3	24.2424	22.0386	3	3	2	3	3	1	2	1	1	5	2	2	2	0	1	1	0
1	62	3	25.0399	21.7738	4	5	2	2	3	1	1	1	1	5	2	1	1	1	0	0	0
1	33	2	22.7903	23.7812	5	2	2	3	1	2	3	1	1	2	2	2	2	0	0	0	0
0	56	2	23.5556	20.4444	4	1	5	4	1	1	2	2	2	5	2	1	1	1	0	0	0
1	60	2	23.4586	22.7583	3	3	2	2	2	1	2	1	1	6	2	1	1	2	1	0	0
0	45	3	20.8117	22.4766	4	4	2	2	2	1	2	1	1	5	2	2	2	0	0	0	0
0	54	2	21.1111	21.9289	5	5	2	3	1	2	2	1	1	6	1	2	2	0	0	0	0
1	50	3	27.7177	22.6474	5	5	2	2	1	3	3	1	1	5	2	2	2	0	1	1	0
1	59	1	21.1073	22.4913	5	2	1	2	2	1	3	1	1	6	2	2	2	0	0	0	0
0	61	1	22.0604	19.9792	4	2	1	2	1	1	2	1	1	4	2	2	2	0	0	0	0
1	45	1	24.4646	26.3465	5	4	2	2	1	1	2	1	1	5	2	2	2	0	0	0	0
1	53	1	15.5238	18.1662	4	6	2	2	1	1	2	1	1	2	2	2	2	0	0	0	0
1	53	3	17.7154	19.487	4	2	2	2	1	2	2	1	1	4	2	1	1	1	1	0	0
1	57	1	20.2812	22.6003	2	2	2	2	3	1	2	1	1	4	2	2	2	0	0	0	0
1	50	1	17.5771	18.5911	5	2	2	2	1	1	3	1	1	2	2	2	2	0	0	0	0
0	40	3	19.5312	16.4062	5	5	2	2	1	1	2	1	1	6	2	2	2	0	0	0	0
0	76	1	23.8054	18.1787	5	3	2	2	1	2	2	1	1	6	2	2	2	0	0	0	0
1	61	2	23.1834	23.5294	4	2	2	2	2	1	2	1	1	4	1	2	2	0	0	0	0
1	55	2	24.2215	22.4913	4	3	2	2	2	2	2	2	2	4	1	1	1	2	0	0	0
0	53	2	18.6667	16.8889	2	2	2	2	1	1	1	1	1	6	2	2	2	0	1	0	0
1	51	2	22.9591	20.7008	4	3	2	2	1	2	3	1	2	5	2	2	2	0	0	0	0
0	42	2	23.1247	21.0962	3	3	2	2	1	1	2	1	1	4	2	2	2	0	0	0	0
0	51	2	17.7778	20	5	4	2	3	3	3	3	1	1	5	2	2	2	0	1	0	0
0	36	1	22.2137	19.2234	3	3	2	2	2	2	3	1	1	5	2	2	2	0	1	0	0
1	50	1	23.833	26.7094	4	6	2	2	2	2	3	1	1	4	2	2	2	0	0	0	0
0	72	2	17.7778	19.4771	2	1	5	2	2	2	3	1	2	1	2	2	2	0	1	0	0
0	52	2	22.2222	22.2222	5	2	2	2	1	2	2	1	1	6	2	1	1	1	0	0	0
1	60	1	18.3655	23.8751	5	3	2	2	2	2	2	1	1	5	2	1	1	1	0	0	0
1	46	2	23.5078	20.202	3	2	2	2	2	1	2	1	1	6	2	1	1	1	0	0	0
0	65	1	17.7778	24.1217	5	8	2	2	1	3	2	1	1	5	2	2	2	2	0	0	0
1	33	2	25.0399	19.9594	5	6	3	2	1	1	1	1	1	6	1	1	1	1	0	0	0
1	56	1	21.5139	21.5139	5	1	5	2	1	2	3	2	2	5	2	1	1	1	0	0	0
1	37	1	21.2585	22.9481	4	4	2	3	1	2	3	1	2	6	2	2	2	0	0	0	0
0	53	2	33.2986	23.4952	5	5	2	2	2	2	2	1	2	3	2	1	1	1	0	2	0
0	34	2	26.0375	21.6311	4	4	2	2	1	1	2	1	1	6	2	2	2	0	1	0	0
1	62	1	17.5781	21.4844	5	3	2	2	3	1	2	1	1	6	2	2	2	0	0	0	0
1	40	2	23.255	20.5191	4	3	2	2	2	1	2	1	1	6	2	2	2	0	0	0	0
1	50	3	20.4491	19.1001	5	3	2	2	1	1	2	2	1	5	2	1	1	1	0	0	0
0	48	2	23.1911	24.1415	3	4	2	2	1	1	3	2	2	6	2	1	1	1	0	0	0
1	49	2	22.4913	24.8016	3	3	2	2	2	2	3	1	1	4	2	2	2	0	0	0	0
1	62	2	21.048	22.5896	5	1	2	2	1	2	3	1	1	5	2	1	1	1	0	0	0
1	43	3	23.597	20.0692	4	3	2	2	1	1	2	1	1	4	2	1	1	1	0	0	0
0	34	1	25.9107	19.8141	5	4	2	2	1	1	2	1	1	5	2	1	1	1	0	0	0
1	38	1	26.6749	20.7612	5	3	2	3	1	2	3	1	1	6	2	2	2	0	0	0	0
1	65	1	25.9959	25.4581	5	7	2	2	3	2	2	1	1	5	2	1	1	3	0	0	1
1	30	1	20.202	21.6713	5	5	2	2	1	1	2	1	1	6	2	2	2	0	0	0	1
0	34	2	22.4323	23.2335	2	4	2	2	2	1	2	1	1	5	2	2	2	0	0	1	0
1	57	1	21.1927	20.202	5	3	2	2	1	1	2	1	1	4	1	2	2	0	0	0	0
1	52	3	19.0311	21.4533	2	6	3	2	1	1	2	1	1	5	2	1	1	1	1	0	0
1	69	2	23.4375	19.3337	4	3	2	1	1	3	2	1	1	4	2	1	1	1	1	0	0
0	33	3	20.5457	18.902	2	1	4	5	1	1	2	2	1	6	2	1	1	0	0	0	0
0	35	1	22.7732	19.8347	3	3	2	2	2	1	2	1	1	5	2	1	1	1	0	0	0
1	49	3	27.4406	19.5918	4	3	2	2	1	1	2	1	1	4	2	1	1	1	0	0	0
1	41	2	24.858	19.8177	3	3	1	2	1	1	3	1	1	5	1	2	2	0	0	0	0
1	60	1	15.9439	19.487	5	7	2	2	2	1	2	1	1	3	2	2	2	0	0	0	0
0	63	3	25.8065	27.0552	4	5	2	2	1	1	2	1	1	3	2	1	1	2	0	0	0
1	31	1	24.4646	25.2174	5	4	2	2	2	3	2	2	2	6	2	2	2	0	0	0	0
1	31	2	22.9568	19.4674	4	1	2	2	1	1	2	1	1	5	1	2	2	0	0	0	0
1	61	1	20.0692	21.2031	5	2	2	2	2	2	2	1	1	4	2	2	2	0	0	0	0
0	50	1	23.7253	18.7305	5	5	1	2	1	1	2	1	1	1	2	1	1	0	0	0	0
0	50	3	20.8117	18.7305	5	4	2	2	1	1	2	1	1	4	2	1	1	1	0	0	0
0	49	1	18.7305	18.7305	5	3	2	2	1	1	3	1	1	5	2	2	2	0	0	0	0
1	31	2	26.9274	21.2585	3	4	2	2	2	1	2	1	1	5	1	1	1	2	0	0	0
1	48	2	23.1405	20.5693	3	3	2	2	1	1	2	1	1	5	2	1	2	2	0	0	0
1	52	2	27.9155	23.5078	5	3	2	2	3	1	2	1	1	5	2	1	1	1	0	0	0
1	72	3	30.303	23.5883	1	5	2	2	1	2	2	1	1	3	2	2	2	0	0	0	0
1	33	1	24.6097	23.8751	4	4	2	2	2	2	2	1	1	5	2	1	1	1	0	0	0
1	55	2	25.6489	27.0416	3	4	2	2	2	2	2	1	1	3	2	1	1	2	0	0	0
1	54	2	21.0077	19.257	5	3	2	2	1	1	2	1	1	4	2	2	2	0	0	0	0
1	56	1	18.3655	20.5693	5	1	4	4	1	2	2	1	1	3	2	2	2	0	0	0	0
0	35	2	22.6003	19.5312	4	3	2	2	2	2	2	1	1	5	2	2	2	0	0	0	0
1	68	2	22.4913	23.255	3	2	2	2	2	2	2	1	1	2	2	2	2	0	0	0	0
1	56	3	23.03	23.8087	5	3	2	2	1	2	2	1	1	5	2	2	2	0	0	0	0
1	63	1	23.03	21.2585	4	2	2	2	1	2	2	1	1	1	1	1	1	1	0	0	0
0	62	1	25.9695	22.8928	4	2	2	2	1	2	2	1	1	4	1	1	1	2	1	0	0
0	56	2	24.974	22.8928	5	3	2	2	1	1	2	1	1	4	2	2	2	0	0	0	0
1	60	3	19.721	21.0077	5	2	2	2	2	2	2	1	1	4	1	2	2	0	0	0	0
1	53	1	22.4913	22.4913	5	4	2	2	1	2	2	1	1	4	1	1	1	1	0	0	0
1	67	1	18.6851	23.1834	5	2	2	2	1	1	2	2	2	4	2	1	1	1	0	0	0
1	58	2	25.3515	20.7612	3	3	2	2	1	1	2	1	1	5	2	1	1	1	0	0	0
0	45	2	20.9644	24.9199	5	2	2	2	2	3	2	1	1	4	1	2	2	0	0	0	0
0	57	1	21.6441	22.8928	5	3	2	3	1	1	2	1	1	5	2	2	2	0	0	0	0
1	56	1	23.6614	23.3234	5	7	2	2	2	1	2	1	1	4	2	2	2	0	0	0	0
0	38	1	24.1415	26.6389	5	4	2	2	1	2	2	1	1	5	2	1	1	1	0	0	0
0	27	2	20.202	21.6713	3	7	2	3	1	3	4	2	2	5	2	1	1	0	0	0	0
0	45	2	23.4375	21.0938	2	2	2	2	2	1	2	1	1	3	2	2	2	0	0	0	0
1	52	2	19.1327	21.0077	5	3	2	2	1	1	3	1	1	2	2	1	1	1	0	1	0
0	57	1	22.6003	20.0288	5	2	2	2	1	1	3	1	1	5	2	2	2	0	1	0	0
1	61	3	25.2595	20.7612	2	2	2	1	3	1	2	1	1	6	1	1	1	3	1	0	0
1	70	1	23.1084	24.1588	3	2	2	2	1	1	2	1	1	6	1	2	2	0	0	0	0
1	31	1	23.03	21.2585	5	3	2	2	1	2	2	1	1	5	2	2	2	0	0	0	0
0	69	1	26.4855	21.3593	2	4	5	4	1	1	2	1	1	2	2	1	1	1	0	0	0
1	32	3	21.1073	22.4913	3	3	2	3	1	1	2	1	1	6	2	2	2	0	0	0	0
0	35	1	22.2222	21.7778	5	4	2	3	2	1	2	1	1	5	2	2	2	0	0	0	0
0	60	1	18.902	21.3675	5	2	2	2	1	1	2	1	1	4	2	2	2	0	0	0	0
1	61	3	23.1473	23.4375	4	3	2	2	2	1	2	1	1	5	1	1	1	1	0	0	0
1	54	1	23.7387	19.0311	5	2	2	2	1	1	2	1	1	5	1	2	2	0	1	0	0
0	46	2	22.8624	22.8624	3	4	1	2	2	2	2	1	1	5	1	2	2	0	0	0	0
1	55	1	19.7055	23.7118	5	1	5	2	2	2	2	1	1	6	2	2	2	0	0	0	0
0	48	2	27.2392	20.0288	4	2	2	2	1	1	2	1	1	4	2	2	2	0	0	0	0
0	50	2	21.9289	21.9289	5	2	2	2	1	2	2	1	1	6	2	2	2	0	0	0	0
1	61	2	20.5693	16.5289	4	2	2	2	1	1	2	1	1	5	2	2	2	0	0	0	0
0	66	1	20.8117	23.3091	5	2	2	2	1	2	2	1	1	2	2	1	1	1	1	0	0
0	38	2	18.3594	20.7031	4	3	2	2	1	2	2	1	1	4	2	2	2	0	1	0	0
1	71	3	17.4818	20.3954	4	3	2	2	2	2	2	1	2	1	1	2	2	0	0	0	0
1	50	2	23.8751	22.0386	5	3	2	2	2	1	2	1	1	6	2	2	2	0	1	1	0
0	62	2	28.1876	23.266	3	3	2	4	2	1	2	1	1	3	1	2	2	0	0	0	0
0	53	2	28.8415	28.8415	5	5	2	2	1	1	2	1	1	5	1	1	1	1	0	0	0
1	52	1	23.4375	23.4375	2	5	2	2	2	2	3	1	1	3	2	2	2	0	0	0	0
0	52	1	23.7812	25.4524	4	3	2	2	1	2	2	1	2	4	2	2	2	0	0	0	0
0	60	3	22.3556	25.9695	3	2	2	2	2	2	2	1	1	4	2	1	1	1	0	0	0
0	66	1	20.8117	22.8928	4	5	2	2	3	1	2	1	1	3	2	2	2	0	0	0	0
1	28	1	21.2953	23.0546	4	4	2	2	2	2	2	1	1	5	2	2	2	0	0	0	0
1	50	3	24.8016	19.721	4	3	2	2	1	2	2	1	1	5	2	1	1	1	0	0	0
0	73	3	25.6312	24.974	3	2	2	2	1	2	2	1	2	5	2	1	1	2	2	0	0
1	43	3	24.1672	22.0386	4	3	2	2	2	2	2	1	1	5	2	1	1	2	0	0	0
0	53	1	21.3593	25.9695	4	2	2	2	2	2	2	1	2	4	2	2	2	0	0	0	0
0	37	3	19.2234	19.2234	4	3	2	2	1	2	2	1	1	5	2	2	2	0	1	0	0
1	58	1	22.0581	21.0077	4	2	2	2	2	2	2	1	1	3	2	2	2	0	0	0	0
1	60	2	33.7325	24.974	4	2	2	2	1	1	2	1	1	4	2	2	2	0	0	0	0
1	32	1	21.4536	20.7008	5	4	2	2	2	2	2	1	1	3	2	1	1	1	0	0	0
1	46	1	21.2585	19.487	5	4	2	2	2	1	2	1	1	5	2	2	2	0	0	0	0
1	49	2	26.0262	20.0773	1	3	2	2	1	1	2	1	2	4	2	1	1	1	0	0	0
1	59	3	24.8016	19.487	4	5	2	2	1	1	2	1	1	5	1	1	1	2	0	0	0
1	34	2	19.487	20.5499	4	4	2	2	3	1	2	1	1	5	2	1	1	1	0	0	0
1	52	1	21.4844	19.052	5	5	2	2	2	3	2	1	1	5	2	2	2	0	1	0	0
1	58	3	23.6614	17.5771	3	4	2	2	2	1	2	1	1	5	2	1	1	3	0	0	0
1	55	3	26.8923	19.721	3	2	2	2	1	1	2	1	1	5	2	1	1	2	0	0	0
1	60	1	20.0692	21.4533	5	4	2	2	1	1	2	1	1	6	2	1	1	2	1	0	0
0	52	3	23.5237	18.5901	2	2	2	2	1	2	2	1	1	3	2	1	1	2	0	0	0
1	49	1	19.0311	17.301	5	3	2	2	2	1	2	1	1	5	2	1	1	1	0	0	0
1	53	3	24.224	20.0474	3	3	2	2	2	2	2	1	1	4	2	1	1	1	0	0	0
0	67	1	19.9792	24.6548	5	2	2	2	1	1	2	1	1	4	2	1	1	1	0	0	0
0	50	2	23.4375	21.0938	4	3	2	2	1	1	2	1	1	5	2	1	1	1	0	0	0
1	52	1	18.7109	21.2169	5	6	2	2	1	2	2	1	1	5	2	2	2	0	0	0	0
0	57	1	17.2584	17.6693	5	3	2	2	1	1	2	1	1	5	2	1	1	1	0	1	0
0	61	2	25.3906	21.4844	7	2	2	2	1	1	2	1	1	2	1	1	1	1	0	0	0
1	50	2	22.4913	20.5191	4	3	2	2	1	1	2	1	1	3	2	1	1	1	0	0	0
0	36	2	21.1927	18.2183	3	4	2	2	1	2	2	1	1	5	2	1	1	1	1	0	0
1	64	3	21.875	23.4375	4	2	2	2	1	1	2	1	1	2	2	1	1	1	0	0	0
0	63	1	20.8117	28.3039	5	2	2	2	1	2	2	1	1	6	2	1	1	1	1	0	0
0	64	3	17.7778	21.6413	4	3	2	2	1	1	2	1	1	4	1	1	1	1	0	0	0
0	51	1	26.6667	19.4771	4	2	2	2	2	2	2	1	1	4	2	1	1	1	0	0	0
1	36	1	19.9219	23.4375	4	3	2	2	2	2	2	1	1	5	2	2	2	0	0	0	0
1	68	3	27.4406	23.6713	4	5	5	2	2	1	2	1	1	4	2	1	1	1	0	0	0
1	58	1	20.7031	20.8325	5	5	5	2	2	2	2	1	1	2	2	2	2	0	1	0	0
0	52	2	22.8624	18.8942	3	2	2	2	1	1	2	1	1	4	1	1	1	1	0	0	0
0	52	2	22.8928	18.4911	5	5	2	2	1	2	2	1	2	4	1	2	2	0	0	0	0
0	48	1	22.3111	23.4952	4	2	9	5	1	3	2	2	2	4	2	2	2	0	0	0	0
0	35	1	23.5556	25.3333	4	4	2	2	1	2	2	1	1	5	2	2	2	0	0	1	0
1	48	3	24.2215	20.7612	5	7	2	2	2	1	2	1	1	3	2	2	2	0	1	0	0
1	53	3	23.8754	22.4913	4	2	2	2	1	1	2	1	1	5	1	2	2	0	0	0	0
1	32	2	22.7583	17.5064	3	3	2	2	1	2	2	1	1	4	2	2	2	0	0	0	0
0	56	1	24.7676	18.8189	4	2	2	2	1	2	2	1	2	4	2	2	2	0	0	0	0
0	37	3	20.1348	22.3133	4	3	2	2	1	2	2	1	1	5	2	1	1	1	1	0	0
0	55	3	26.5643	27.0552	4	4	2	2	1	1	2	1	1	5	1	2	2	0	0	0	0
1	65	3	20.6575	21.7079	4	5	2	2	2	1	2	1	1	3	1	1	1	2	0	0	0
0	58	3	21.2279	20.5457	4	4	2	2	2	2	2	1	1	2	2	1	1	2	0	0	0
1	59	2	19.4734	19.4734	4	5	2	2	2	2	2	1	1	5	2	2	2	0	0	0	0
0	56	2	27.0552	22.6003	4	6	2	2	1	2	2	1	1	5	2	2	2	0	1	0	0
1	58	1	30.8365	28.6851	3	5	2	2	2	2	2	1	1	5	2	1	1	1	0	0	0
0	34	3	19.5556	21.6413	3	4	2	2	1	2	2	1	2	3	1	2	2	0	0	0	0
0	50	2	28.4444	19.736	4	3	2	2	2	2	3	1	1	5	2	1	1	1	0	0	0
0	58	2	27.7767	23.4375	4	2	2	2	2	2	2	1	2	4	2	1	1	2	0	0	0
0	60	2	27.4077	20.8117	3	5	2	2	1	2	2	1	1	5	2	2	2	0	1	0	0
1	53	3	22.7244	23.6713	4	4	2	2	1	2	2	1	1	4	2	2	2	0	0	0	0
0	39	1	21.9289	24.1217	4	3	2	2	2	2	2	1	2	5	2	2	2	0	0	0	0
0	34	3	26.4463	16.5657	4	3	2	2	1	3	2	1	1	3	2	1	1	2	1	0	0
1	31	2	21.2585	19.487	4	7	2	2	1	2	2	1	1	2	2	1	1	1	0	0	0
0	71	1	27.3438	24.4646	4	1	5	2	2	2	2	1	1	5	2	1	1	1	1	0	0
1	61	3	22.4913	23.6614	4	1	2	3	1	2	3	1	2	4	2	1	1	1	0	0	0
0	59	2	20.7031	23.6328	3	7	2	2	1	2	2	1	1	1	2	1	1	1	0	0	0
1	60	3	20.8325	24.7676	3	2	2	2	1	1	2	1	1	2	1	2	2	0	0	1	0
0	33	3	21.0772	20.3244	4	2	2	2	2	2	2	1	2	5	2	2	2	0	0	0	0
0	42	2	24.2188	23.1473	4	3	2	2	1	2	2	1	1	5	2	2	2	0	0	0	0
1	61	3	23.3469	20.2812	3	4	2	2	1	2	2	1	2	2	2	1	1	2	0	0	0
1	67	1	19.052	24.4646	3	2	2	2	1	2	2	1	1	3	2	2	2	0	0	0	0
1	66	3	22.2656	20.202	4	5	2	2	2	2	2	1	1	2	2	1	1	1	0	0	0
0	63	3	25.7778	19.4771	2	3	2	2	1	3	2	1	1	3	1	1	1	1	0	0	0
0	53	3	22.2222	20	5	2	2	2	2	2	2	1	1	4	2	2	2	0	0	0	0
0	48	3	25.7778	21.6413	5	4	2	2	1	2	2	1	1	4	2	1	1	1	0	0	0
1	58	1	19.0311	22.8374	3	6	2	2	1	3	2	1	1	4	2	2	2	0	0	0	0
1	72	1	17.7863	20.7612	4	2	2	2	2	2	2	1	1	5	2	2	2	0	0	0	0
1	47	3	23.3887	21.9713	4	2	2	2	2	2	2	1	1	6	2	1	1	1	0	0	0
1	46	3	24.977	18.3655	3	2	2	2	1	1	2	1	1	3	2	1	1	1	0	0	0
1	64	1	20.8666	21.7738	2	6	2	2	1	1	2	1	1	3	2	1	1	2	0	0	0
0	70	1	17.4818	22.3133	4	3	2	2	2	2	2	1	1	4	2	2	2	0	0	0	0
1	46	1	25.7812	28.0404	4	5	2	2	1	2	3	1	1	6	2	2	2	0	0	0	0
0	60	2	23.0681	22.8928	4	4	5	2	1	3	2	1	1	4	2	2	2	0	0	0	0
1	46	2	23.7954	22.0386	3	4	2	2	2	2	2	1	1	2	1	2	2	0	0	0	0
0	70	1	14.5682	21.3593	4	5	5	2	2	2	3	1	1	4	2	2	2	0	0	0	0
1	38	2	23.8751	25.4028	4	3	2	2	3	2	2	1	1	6	2	2	2	0	2	0	0
1	71	1	18.3768	21.2245	4	5	2	2	2	2	2	1	1	6	1	2	2	0	0	0	0
1	53	2	22.0932	17.3589	2	2	2	2	2	2	2	1	1	5	2	2	2	0	1	1	0
0	35	2	19.0311	18.7783	4	3	2	2	2	2	2	1	1	4	2	2	2	0	0	0	0
0	32	1	18.591	20.3125	4	2	2	2	2	2	2	2	2	5	2	2	2	0	0	0	0
1	50	3	23.03	17.7154	4	4	2	2	2	2	2	1	1	4	2	1	1	1	0	0	0
1	71	1	22.5827	24.1672	5	3	3	2	2	2	2	1	1	5	2	2	2	0	0	0	0
1	55	3	23.8751	25.0995	4	5	2	2	1	2	2	1	1	3	2	2	2	0	0	0	0
0	49	1	27.7008	23.4952	4	3	2	2	2	2	2	1	1	4	2	2	2	0	0	0	0
1	64	2	19.6072	21.2585	3	2	2	2	2	2	2	1	1	1	1	2	2	0	0	0	0
0	55	1	25.8065	19.1467	1	3	2	2	1	3	2	1	1	2	2	2	2	0	0	0	0
1	53	1	18.8092	19.8352	5	2	2	2	2	2	2	1	1	2	1	2	2	0	0	0	0
1	52	3	25.4028	27.8852	3	4	2	2	2	2	2	1	1	6	2	2	2	0	1	0	0
1	62	1	22.0386	19.0039	4	5	2	2	1	2	2	1	2	4	2	2	2	0	0	0	0
1	52	1	21.4844	23.4375	5	3	2	2	2	2	2	1	1	4	2	1	1	1	0	0	0
1	55	1	23.5294	18.8092	5	3	2	2	2	2	2	1	1	4	2	2	2	0	0	0	0
1	60	1	20.83	23.7332	4	2	2	2	1	3	2	1	1	1	2	2	2	0	0	0	0
1	66	3	26.0375	23.4375	4	2	2	2	1	2	2	1	1	2	2	2	2	0	0	0	0
0	58	2	18.7305	20.5457	4	2	2	2	2	2	2	1	1	3	1	1	1	1	0	0	0
1	71	2	15.4321	15.6986	4	2	2	2	2	2	2	1	1	3	2	1	1	1	0	0	0
1	50	2	21.0498	21.1389	4	2	2	2	1	2	2	1	2	5	2	2	2	0	0	0	0
1	38	1	22.7732	24.6097	5	4	2	2	1	2	2	1	1	4	2	2	2	0	0	0	0
1	71	3	18.5911	23.6614	3	3	3	3	2	1	2	1	1	4	1	1	1	1	0	0	0
0	25	2	17.9089	17.1468	2	3	2	2	2	3	3	1	1	2	2	2	2	0	0	0	0
1	41	1	29.375	30.0433	4	3	2	2	2	2	2	1	1	6	2	2	2	0	0	0	0
0	57	3	19.052	19.9481	4	2	2	2	1	3	2	1	1	5	1	2	2	0	0	0	0
0	52	2	24.974	22.8928	3	2	2	2	2	2	2	1	1	5	2	2	2	0	0	0	0
1	50	2	23.2377	23.7954	3	3	2	2	2	2	2	1	1	5	2	2	2	0	0	0	0
0	47	3	19.5312	17.7462	4	3	2	2	2	1	2	1	1	5	2	2	2	0	0	0	0
1	54	1	19.487	17.7154	5	2	2	2	2	2	2	1	1	3	2	2	2	0	0	0	0
1	52	3	27.5482	23.8751	3	2	2	2	1	1	2	1	1	5	2	1	1	1	0	0	0
1	54	2	26.5021	23.3377	3	1	2	2	1	2	2	1	1	5	2	1	1	1	0	0	0
1	60	1	23.6614	18.3768	3	5	2	2	1	2	2	1	1	1	2	1	1	2	0	0	0
1	67	3	25.3444	21.2585	5	2	2	2	2	2	2	1	1	5	1	1	1	1	0	0	0
1	49	3	23.5078	20.202	3	2	2	2	1	1	2	1	1	3	2	1	1	1	0	0	0
0	68	3	24.4248	22.2222	5	8	2	2	2	2	2	1	1	2	1	1	1	2	0	0	0
1	64	3	22.8571	19.5918	5	2	2	2	2	2	2	1	1	5	1	1	1	1	0	0	0
0	52	1	20.8117	18.7305	5	2	2	2	1	2	2	1	1	4	2	2	2	0	0	0	0
1	36	1	17.3611	17.7154	5	3	2	2	2	2	2	1	1	3	2	2	2	0	0	0	0
1	58	2	26.5731	22.4913	4	5	2	2	1	2	3	1	1	4	2	1	1	2	0	0	0
1	45	3	19.3098	22.1443	4	4	2	2	2	2	2	1	1	3	2	1	1	1	0	0	0
0	55	3	34.1749	23.8054	4	3	2	2	1	2	2	1	1	5	2	1	1	1	0	0	0
0	66	3	30.9156	29.3413	4	2	5	3	1	3	2	1	1	3	2	2	2	0	1	0	0
1	50	2	21.6041	19.6094	3	3	2	2	3	2	2	1	1	5	2	1	1	1	0	0	0
0	63	2	23.3091	24.6548	3	2	2	2	2	2	2	1	1	1	1	1	1	1	0	0	0
1	35	1	18.9292	18.5911	5	3	2	2	2	2	2	1	1	5	2	2	2	0	0	0	0
0	30	2	33.7325	21.9261	4	2	2	2	2	2	2	1	1	2	2	1	2	0	0	0	0
0	55	3	22.4766	24.974	3	2	2	2	1	1	2	1	1	4	1	1	1	1	0	0	0
0	59	1	21.0828	19.3962	5	2	2	2	1	2	2	1	1	5	2	2	2	0	0	0	0
1	54	1	18.3594	21.4844	5	3	2	2	1	2	2	1	1	4	2	2	2	0	0	0	1
1	68	2	17.7154	20.7612	4	3	2	2	1	2	2	1	1	5	1	2	2	0	0	0	1
1	67	3	24.2215	22.4913	4	2	2	2	2	2	2	1	1	4	1	1	1	1	0	0	1
1	65	1	19.3772	24.2215	4	2	2	2	1	2	2	1	1	4	2	2	2	0	0	0	1
0	49	3	22.1003	22.8624	3	3	2	2	1	2	2	1	1	3	2	2	2	0	0	0	1
1	59	3	20.3223	21.7738	3	5	2	2	2	2	2	1	1	4	1	1	1	1	0	0	1
0	39	2	22.0317	23.2335	5	3	2	2	1	1	2	1	1	4	2	2	2	0	0	0	1
1	72	3	17.7154	19.3772	3	2	2	2	2	1	2	1	1	4	1	1	1	1	0	0	1
0	69	2	25.2994	24.974	3	2	2	2	1	2	2	1	1	5	2	1	1	1	0	0	1
0	57	3	22.6562	21.875	3	3	2	2	2	2	2	1	1	4	2	1	1	1	0	0	1
0	34	1	27.0552	21.6441	5	3	2	2	1	1	2	1	1	5	2	1	1	1	0	0	1
1	66	3	25.0995	26.5731	5	7	2	2	1	2	2	1	1	5	1	2	2	0	0	0	1
1	50	3	24.3438	21.847	2	4	2	2	1	2	2	1	1	5	2	1	1	1	0	0	1
1	30	2	19.0311	17.9931	3	3	2	2	1	1	2	1	1	6	2	2	2	0	0	0	1
1	61	3	21.0077	22.7583	2	2	2	2	1	1	2	1	1	4	2	2	2	0	0	0	1
1	69	2	24.2215	21.9713	3	2	2	2	1	1	2	1	1	3	1	2	2	0	0	0	1
0	62	1	22.8928	20.0288	4	2	2	2	1	2	2	1	1	3	2	2	2	0	0	0	1
0	51	3	26.4024	25.9695	2	2	2	1	1	1	2	1	1	5	1	2	2	0	0	0	1
1	75	3	14.1969	17.5771	2	2	2	2	1	1	2	1	1	5	2	2	2	0	0	0	1
0	48	2	20.4491	20.4491	4	1	4	5	2	2	2	2	2	4	2	2	2	0	0	0	1
1	52	3	17.5781	23.4375	4	3	2	2	1	2	2	1	1	5	2	2	2	0	0	0	1
1	31	2	17.184	18.424	3	5	2	2	2	2	2	1	2	4	2	2	2	0	0	0	1
0	38	3	23.4375	23.4375	5	3	2	2	1	3	2	2	2	5	2	2	2	0	0	0	1
0	50	2	23.5556	28.8889	4	3	2	2	3	2	2	1	1	3	1	1	1	1	1	0	1
1	50	1	27.1203	24.0385	5	7	2	2	1	1	2	1	1	5	2	2	2	0	0	0	1
1	54	1	19.6311	20.5442	5	6	2	2	2	1	2	1	1	5	2	2	2	0	0	0	1
0	56	2	20.0288	20.0288	5	4	2	2	2	1	2	1	1	2	1	2	2	0	0	0	1
0	71	1	17.2248	19.5312	4	2	2	2	1	2	2	1	1	5	2	2	2	0	0	0	1
0	37	1	23.4375	19.5312	4	4	2	2	2	2	2	2	2	5	2	2	2	0	0	0	1
1	68	3	18.8092	23.939	2	2	2	2	1	1	2	1	1	5	1	1	1	1	2	0	1
0	33	1	17.7778	20.4444	4	4	2	2	1	2	2	2	2	3	2	2	2	0	0	0	1
0	56	3	19.2234	18.7305	3	3	5	2	1	2	2	1	1	4	2	2	2	0	0	0	1
1	73	3	18.9292	20.0474	3	2	2	2	1	1	2	1	1	4	1	1	1	1	0	0	1
1	47	3	26.1224	19.5918	3	3	2	2	1	1	2	1	1	5	2	1	1	1	0	0	1
0	71	2	20.8247	23.1385	3	2	2	2	2	2	2	1	1	3	2	2	2	0	0	0	1
1	70	3	19.487	19.257	3	2	2	2	1	3	2	2	1	2	1	2	2	0	2	0	1
1	69	3	17.3611	19.257	4	5	2	2	2	1	2	1	1	4	1	2	2	0	0	0	1
1	38	1	17.301	19.0311	5	4	2	2	1	2	2	1	1	4	2	2	2	0	0	0	1
0	45	2	26.6667	24.8889	4	3	2	2	1	1	2	1	1	4	2	2	2	0	0	0	1
0	66	2	15.5556	19.2234	4	2	2	2	1	2	2	1	1	3	1	2	2	0	0	0	1
1	51	1	19.9481	22.5827	5	5	2	2	2	2	2	1	1	2	2	2	2	0	0	0	1
0	59	1	18.9292	19.8177	5	2	2	2	1	1	2	2	2	5	2	2	2	0	0	0	1
1	44	2	22.7583	21.0077	5	3	2	2	1	1	2	1	1	4	2	2	2	0	0	0	1
1	66	1	24.974	25.3906	4	2	2	2	1	2	3	1	1	6	2	2	2	0	0	0	1
0	46	1	21.7784	20.8117	5	2	2	2	1	1	2	1	1	6	2	2	2	0	1	0	1
0	36	1	24.0346	21.6441	2	3	2	2	3	1	2	1	1	6	2	2	2	0	0	0	1
0	47	2	21.9261	23.1911	2	3	2	2	2	1	3	1	1	5	2	2	2	0	0	0	1
0	61	3	26.7094	22.6003	3	4	2	2	1	1	2	1	2	3	2	1	1	1	0	0	1
1	51	3	24.9135	20.0692	2	3	2	2	1	1	2	1	1	4	2	1	1	2	2	0	1
1	72	3	17.3702	17.301	2	2	2	2	2	2	2	1	1	4	2	2	2	0	0	0	1
1	43	3	16.5289	17.6309	2	3	4	5	2	1	2	1	1	5	2	1	1	1	0	0	1
1	49	3	28.5665	29.865	2	5	2	3	1	1	1	1	1	5	1	2	2	0	0	0	1
0	39	2	20.8117	18.4911	3	3	2	2	2	1	3	1	2	5	1	2	2	0	0	0	1
1	34	3	22.0581	23.8087	1	3	2	2	2	2	2	1	1	4	2	2	2	0	0	0	1
1	54	1	13.9578	18.3655	5	4	2	2	1	1	2	1	2	3	2	2	2	0	0	0	1
1	65	3	17.474	23.255	3	5	2	2	2	1	2	1	1	5	1	2	2	0	0	0	1
0	70	3	17.7778	18.1787	3	5	2	2	1	2	2	1	1	2	1	1	1	1	1	0	1
1	52	1	23.5078	23.5078	3	7	2	2	2	1	3	1	1	4	1	2	2	0	0	0	1
1	69	3	22.6757	22.4913	4	4	2	2	1	2	3	1	1	2	1	1	1	1	0	0	1
1	50	3	23.7812	22.3435	2	2	2	2	2	2	3	1	2	5	2	2	2	0	0	0	1
1	65	2	14.881	19.0311	3	2	2	3	3	2	2	1	1	4	2	2	2	0	0	0	1
0	57	1	17.1875	23.1473	5	3	2	2	1	1	2	1	1	6	2	2	2	0	0	0	1
0	47	1	24	24.4444	4	2	2	2	2	2	2	1	1	5	2	2	2	0	0	0	1
0	51	1	27.3923	25.1096	3	2	2	2	2	2	2	1	1	5	2	2	2	0	0	0	1
0	56	1	28.764	20.5457	2	2	2	2	2	1	1	1	1	5	2	1	1	2	0	0	1
0	62	1	27.3923	26.4792	4	2	2	2	2	1	2	1	1	4	2	2	2	0	0	0	1
1	67	1	37.3419	21.6713	5	4	2	2	1	1	2	1	1	2	2	2	2	0	0	0	1
0	72	3	23.4952	24.6548	2	4	2	2	2	1	2	1	1	6	2	1	1	3	0	0	1
1	70	2	21.2585	22.6757	4	2	2	2	2	2	2	2	2	4	2	2	2	1	0	0	1
0	34	1	19.563	20.8117	5	4	2	2	1	3	2	1	2	6	2	2	2	0	1	1	1
1	55	1	25.6055	20.7612	5	2	2	2	1	1	3	1	1	6	1	2	2	0	0	0	1
1	53	2	24.977	26.0262	2	4	2	2	2	1	3	2	2	6	1	2	2	0	0	0	1
1	58	2	25.3515	20.2449	3	3	2	2	1	1	3	1	1	5	2	1	1	1	0	0	1
1	57	3	18.8268	20.7157	3	3	2	2	1	1	1	1	1	4	2	2	2	0	0	1	1
0	45	2	20.0288	23.634	3	4	3	2	2	1	2	1	1	4	2	2	2	0	0	0	1
1	33	2	24.8016	26.5731	4	3	2	2	1	2	2	2	1	3	2	1	1	1	0	0	1
1	35	1	22.0386	19.8347	5	3	2	2	3	1	2	2	2	2	2	2	2	0	1	0	1
0	54	1	25.2174	18.2183	5	2	2	2	2	1	3	1	1	1	2	2	2	0	1	0	1
1	32	1	21.3382	22.8624	6	6	2	2	3	3	3	1	1	6	2	2	2	0	0	1	1
1	53	3	25.3515	20.2812	3	2	2	2	2	1	2	2	2	4	2	1	1	1	0	0	1
1	68	3	17.301	18.8092	2	3	2	2	3	1	2	1	1	4	1	2	2	0	0	0	1
0	53	1	19.0443	21.6413	2	5	2	2	1	3	3	2	1	4	2	2	2	0	0	1	1
0	63	2	35.1562	22.6562	5	4	5	2	1	1	1	2	1	5	2	2	2	0	0	0	1
0	60	2	18.3594	19.5312	5	3	5	2	1	3	3	1	2	1	2	2	2	0	0	0	1
1	64	2	26.6436	18.3391	3	2	2	3	1	1	2	2	1	5	1	1	1	1	0	0	1
1	49	1	19.1001	20	5	2	2	2	1	1	2	1	2	5	2	2	2	0	0	0	1
0	50	1	18.662	24.3418	5	2	2	2	2	1	2	1	1	5	2	1	1	1	0	0	1
1	60	3	26.0262	19.7055	5	4	2	2	1	1	1	1	1	5	2	2	2	0	0	0	1
0	59	2	20.9321	22.8928	3	3	2	2	1	2	2	1	1	5	2	1	1	2	0	1	1
1	35	2	20.7967	20.7967	3	5	2	3	3	1	3	1	1	5	2	2	2	0	2	2	1
0	56	1	21.2183	26.6193	5	4	2	2	1	1	2	1	1	4	2	2	2	0	0	0	1
0	71	3	22.2222	22.2222	3	1	5	2	1	1	2	2	1	4	2	1	1	1	2	0	1
0	65	1	24.974	27.0552	5	3	2	2	3	1	2	1	1	5	2	2	2	0	0	0	1
0	34	1	23.5556	24.4444	5	3	2	2	3	1	3	2	2	5	2	2	2	0	1	0	1
0	71	2	17.7778	26.6667	5	2	2	3	1	3	3	1	1	3	2	2	2	0	0	0	1
1	38	1	22.3081	23.7954	5	3	2	2	2	1	2	1	1	5	2	2	2	0	0	0	1
0	60	1	16.6659	16.4474	5	4	2	2	2	1	2	1	1	5	2	1	2	0	0	1	1
0	36	1	23.4375	25.3906	5	5	2	2	1	1	2	1	1	5	2	2	2	0	0	0	1
1	67	3	21.2306	22.5827	4	4	2	2	1	1	2	2	1	4	2	1	1	1	1	0	1
0	52	1	21.9076	20.2848	5	3	2	2	1	1	2	2	2	6	2	1	1	1	2	0	1
0	59	1	18.7305	19.9792	4	2	2	2	1	1	2	2	2	3	2	2	2	0	0	0	1
0	69	2	19.2234	19.563	5	2	2	2	2	1	2	1	1	5	2	2	2	0	0	0	1
0	61	1	17.0656	23.7253	2	2	2	2	3	1	2	1	1	3	2	2	2	0	0	0	1
0	64	2	17.0088	25.711	4	6	2	2	1	1	2	1	2	5	2	2	2	0	0	0	1
0	64	2	28.3771	25.2241	4	6	2	2	1	2	2	1	1	2	2	2	2	0	0	0	1
1	70	2	22.4913	22.4913	4	6	2	2	2	1	2	1	2	3	2	2	2	0	0	0	1
1	66	2	26.2188	20.0692	4	2	2	1	1	3	3	1	2	3	2	2	2	0	0	0	1
0	60	1	24.6094	19.5312	5	2	2	3	1	3	2	2	2	1	2	2	2	0	0	0	1
0	54	2	23.1111	20	3	3	2	2	3	2	3	1	2	4	2	2	2	0	0	0	1
0	60	1	25.4524	19.4363	3	2	2	2	1	1	2	1	1	3	1	1	1	1	0	0	1
1	62	1	19.8347	21.3039	5	2	2	2	1	2	3	1	1	6	2	2	2	0	0	0	1
0	56	1	20.1956	21.2585	1	4	4	5	2	3	2	1	2	5	2	1	1	0	2	0	1
1	68	1	19.3625	22.231	4	4	2	2	1	1	2	1	1	5	2	2	2	0	0	0	1
1	68	1	20.8117	25.8065	2	3	2	3	1	1	3	1	1	5	2	2	2	0	0	0	1
0	62	1	20.9566	23.0112	4	5	2	2	1	1	2	1	1	2	2	2	2	0	0	0	1
1	61	3	21.7738	23.5883	5	5	2	2	2	2	2	1	1	5	1	2	2	0	0	0	1
1	30	2	19.487	19.8413	5	5	2	2	1	1	2	1	1	4	2	2	2	0	0	0	1
1	53	2	20.7612	20.7612	4	3	2	2	3	1	2	1	1	5	2	1	1	1	0	0	1
0	69	1	18.902	23.0112	5	2	2	2	1	1	2	1	1	3	2	2	2	0	0	0	1
1	50	3	19.5918	20.2449	4	3	2	2	2	2	2	1	1	4	1	1	1	1	1	0	1
1	65	3	29.4118	21.4533	3	5	2	2	1	1	2	1	1	6	1	1	1	2	0	0	1
0	28	1	22.1893	20.5457	5	2	2	2	1	1	2	1	1	5	2	1	1	1	0	0	1
1	47	2	18.7242	19.3698	5	3	2	2	2	1	2	1	1	5	2	1	1	1	0	0	1
1	49	1	20.1956	19.487	5	2	2	2	2	1	2	1	1	4	2	1	1	1	0	0	1
0	42	1	17.2584	20.5457	5	5	2	2	1	1	2	1	1	5	2	1	1	1	0	1	1
1	59	3	22.4913	19.0311	3	4	2	2	1	1	2	1	1	5	2	1	1	1	0	0	1
0	55	1	17.0068	21.2585	5	5	2	3	1	2	3	1	1	5	2	2	2	0	0	0	1
1	70	3	28.699	19.487	5	2	4	2	1	1	2	1	1	6	1	2	2	0	0	0	1
1	56	1	28.075	26.4236	5	2	2	2	2	2	3	1	1	5	1	2	2	0	0	1	1
1	59	1	19.8141	20.9572	4	8	2	2	3	1	3	1	1	6	2	2	2	0	0	1	1
1	29	1	19.721	20.4382	3	2	2	2	1	1	2	1	1	6	2	1	1	1	1	1	1
1	66	1	22.7694	23.3091	5	2	2	2	1	1	1	1	1	5	1	2	2	0	1	0	1
1	70	1	19.5717	21.0772	4	2	2	2	2	1	3	1	1	6	2	2	2	0	0	0	1
1	72	1	20.6852	23.2254	4	2	2	2	1	1	3	1	1	3	1	2	2	0	0	0	1
1	68	3	25.9516	20.7612	3	2	2	2	2	1	2	1	1	5	1	2	2	0	1	0	1
0	50	2	20.9644	23.7332	4	3	2	2	1	2	3	1	1	5	1	2	2	0	0	0	1
1	67	2	23.5294	23.5294	3	3	2	2	2	1	2	1	1	4	2	2	2	0	0	0	1
1	59	1	22.4913	24.5089	5	5	2	2	2	1	3	1	1	4	2	2	2	0	0	0	1
1	27	2	22.0386	19.3337	4	3	2	2	1	2	3	1	1	6	2	2	2	0	0	0	1
1	56	2	22.231	23.3067	5	2	1	1	1	1	2	1	1	3	1	2	2	0	0	0	1
1	49	1	24.7934	21.6713	2	2	2	2	1	1	4	2	2	6	1	2	2	0	0	1	1
1	49	1	21.6413	24.4444	5	2	2	2	1	1	4	1	2	6	2	2	2	0	0	0	1
0	59	1	22.3133	23.634	2	2	2	2	2	1	2	1	1	6	2	2	2	0	0	0	1
1	63	2	20.4382	21.5139	5	2	2	2	1	1	2	1	2	6	1	2	2	0	0	0	1
1	70	1	19.8352	22.4913	5	2	2	2	1	1	3	1	1	5	2	2	2	0	0	0	1
0	65	2	24.6711	20.7756	4	3	2	2	2	1	2	1	1	6	1	1	1	2	0	0	1
1	47	2	26.6436	24.8016	2	2	2	2	2	2	3	1	1	5	2	2	2	0	0	0	1
1	57	2	24.8358	24.0346	4	3	2	2	2	1	1	1	1	5	2	2	2	0	0	0	1
1	39	1	23.1385	20.8247	3	3	2	2	1	1	3	2	2	3	2	2	2	0	0	1	1
1	43	1	25.6369	21.6311	5	3	2	1	1	1	2	1	1	6	2	2	2	0	0	0	1
1	67	1	13.4948	16.955	5	2	2	2	1	2	2	1	1	1	1	2	2	0	1	0	1
0	68	2	22.0604	22.0604	2	5	1	1	1	1	2	1	1	6	1	1	1	1	0	0	1
1	27	2	19.721	22.231	4	7	1	1	3	1	1	1	2	6	2	1	1	1	0	0	1
1	45	1	21.6713	22.0386	5	6	2	2	1	1	2	1	2	4	2	1	1	1	0	1	1
1	58	1	21.1073	22.4913	3	5	2	2	1	1	2	1	1	6	2	2	2	0	0	0	1
1	62	1	21.5139	23.3067	5	2	2	2	3	1	2	2	1	5	2	2	2	0	0	0	1
1	62	1	18.902	22.6003	4	7	2	2	1	3	2	2	2	5	1	2	2	0	0	0	1
0	48	1	22.2656	21.4844	4	6	2	2	2	2	3	1	1	6	2	2	2	0	0	0	1
1	36	1	22.2291	21.2031	5	4	2	2	2	1	2	1	1	4	2	2	2	0	0	0	1
0	38	2	19.7239	20.5457	3	2	4	4	1	2	2	2	2	3	2	2	2	0	1	0	1
0	58	1	25.4767	18.4911	5	2	4	2	2	1	3	2	2	5	2	2	2	0	0	0	1
1	59	2	24.8971	17.9012	2	6	2	2	1	2	2	2	1	6	2	2	2	0	1	0	1
0	65	1	21.9076	20.4294	4	4	2	1	1	3	3	1	1	1	1	1	1	2	0	0	1
0	69	1	20.3954	24.0346	5	2	2	2	2	2	2	1	1	6	2	2	2	0	0	0	1
1	40	1	17.9931	20.7612	5	4	2	2	1	1	2	1	1	5	2	2	2	0	0	0	1
1	70	2	23.7387	22.6757	4	3	2	2	3	1	2	1	1	6	2	2	2	0	0	0	1
1	72	2	17.301	22.4913	4	4	2	2	2	1	2	1	1	3	2	2	2	0	1	0	1
1	49	1	21.2585	20.5499	3	4	2	2	1	1	2	1	1	4	2	2	2	0	0	0	1
0	36	2	20.0288	18.026	5	3	2	2	2	1	2	1	1	5	2	2	2	0	0	1	1
1	57	3	23.03	25.1559	5	5	2	2	2	2	2	1	1	5	1	1	1	1	0	0	1
1	39	1	19.9594	18.8707	5	3	2	3	3	1	2	1	1	6	2	2	2	0	0	0	1
1	58	2	19.9219	21.4844	5	2	2	2	1	1	2	1	1	5	2	1	1	1	0	0	1
1	27	2	21.4844	21.875	5	2	2	2	2	1	2	1	1	5	2	1	1	1	0	0	1
0	74	1	20.2694	22.2222	3	6	2	2	2	1	2	1	1	5	2	2	2	0	0	1	1
0	62	2	20.8117	22.8928	4	1	5	2	3	1	2	1	1	2	2	2	2	0	0	0	1
1	63	2	21.0938	19.433	3	4	3	2	2	2	2	1	1	4	1	2	2	0	0	0	1
1	60	1	20.2812	21.9713	3	1	2	2	2	1	3	1	1	4	1	2	2	0	0	0	1
1	61	1	23.03	21.2585	3	3	2	2	1	1	3	1	1	5	2	2	2	0	0	0	1
0	69	1	24.4444	20	5	4	5	2	3	1	2	1	1	6	1	2	2	0	0	0	1
0	49	2	21.9289	21.9289	4	3	2	1	2	1	3	1	1	5	1	2	2	0	0	0	1
0	63	1	26.1719	17.9688	3	2	2	2	1	2	2	1	1	5	2	2	2	0	0	0	1
1	57	1	21.8724	21.4533	5	5	2	2	3	1	2	1	2	5	2	2	2	0	0	0	1
0	30	3	22.8329	21.6311	3	3	2	2	1	1	2	1	1	6	1	2	2	0	0	0	1
1	43	1	19.0311	24.0569	5	4	2	2	1	2	2	1	1	6	1	2	2	0	0	0	1
0	54	1	21.5045	22.3478	5	5	2	2	1	2	2	1	1	6	2	1	1	1	0	0	1
0	34	1	22.4323	18.026	3	5	1	2	1	1	2	1	1	5	2	2	2	1	0	0	1
1	50	1	20.9366	20.9366	5	5	2	2	2	2	2	1	1	6	2	2	2	0	0	0	1
0	60	2	26.3465	20.7008	5	6	2	1	1	1	1	1	1	6	1	2	2	0	0	0	1
1	46	1	21.2031	22.2291	4	4	2	2	2	1	3	1	1	5	2	2	2	0	0	0	1
1	62	3	21.7193	23.3355	2	5	2	2	1	1	2	1	1	4	1	2	2	0	0	0	1
0	60	1	16.8889	17.7778	4	3	2	2	1	2	3	1	1	3	2	2	2	0	0	0	1
0	44	2	20.3954	23.7253	3	2	2	2	1	1	1	1	1	6	2	2	2	0	0	0	1
1	62	3	18.1018	20.2865	3	3	2	2	2	1	1	1	1	4	1	2	2	0	0	0	1
0	41	1	19.1001	19.5312	3	3	2	2	2	1	1	1	1	6	2	2	2	0	0	0	1
0	36	2	25.5367	19.2234	5	3	2	2	1	1	3	1	1	5	2	2	2	0	0	0	1
0	56	1	16.0229	17.9418	5	5	2	2	1	3	2	2	2	6	2	2	2	0	0	0	1
1	32	1	21.7982	20.3052	5	5	2	2	1	3	2	1	2	6	2	2	2	0	0	0	1
1	32	1	20.202	20.202	5	3	2	2	3	1	3	1	1	5	2	2	2	0	1	0	1
0	52	1	21.7738	21.2585	4	1	2	2	3	1	1	1	1	6	2	2	2	0	0	0	1
0	52	1	28.578	22.8624	5	3	2	2	1	2	3	1	1	4	2	2	2	0	2	0	1
0	27	2	28.764	20.5457	3	3	2	2	2	1	1	1	1	6	2	2	2	0	0	0	1
1	63	3	25.2174	25.9701	3	3	3	2	1	3	2	1	1	6	1	2	2	0	1	0	1
1	67	3	21.7079	24.1588	5	3	2	2	3	3	3	2	2	6	1	1	1	1	0	0	1
0	74	1	21.4533	23.1834	3	3	2	2	1	3	2	2	1	4	2	2	2	0	0	0	1
0	51	2	25.4767	22.6003	3	2	2	3	3	1	2	2	2	1	2	2	2	0	0	0	1
1	62	2	20.4152	21.6128	2	2	2	2	1	1	2	1	1	5	1	2	2	0	0	0	1
1	63	2	25.3515	20.2812	3	2	2	2	1	1	2	1	1	5	1	1	1	1	0	0	1
0	64	2	20.83	22.0317	3	4	2	2	1	1	2	1	1	4	2	2	2	0	0	0	1
1	73	2	18.7109	21.7181	5	2	2	2	3	1	2	1	1	4	2	1	1	1	0	0	1
1	39	1	19.0311	20.7612	5	3	2	2	3	1	2	1	1	6	2	2	2	0	1	1	1
0	57	1	22.8928	23.7253	5	3	2	2	1	2	3	1	1	2	2	2	2	0	0	0	1
0	46	2	23.833	22.1893	3	3	2	2	1	1	3	1	1	6	2	2	2	0	0	0	1
0	34	2	18.662	21.299	4	2	2	2	1	1	2	1	1	5	2	2	2	0	1	1	1
0	72	1	22.7694	24.974	5	6	5	2	1	1	2	1	1	5	2	2	2	0	0	0	1
1	35	3	19.1571	19.8177	2	3	2	2	3	1	2	1	1	5	2	1	1	1	1	1	1
1	32	3	22.5895	23.8751	3	1	2	2	1	1	2	1	2	5	2	2	2	0	0	0	1
0	52	2	22.8329	19.5312	4	3	2	2	1	2	2	1	1	3	2	2	2	0	0	0	1
0	47	1	15.625	17.7734	4	6	2	2	2	2	2	2	2	2	2	2	2	0	0	0	1
1	65	1	20.202	19.721	4	2	2	2	3	2	2	1	2	5	2	2	2	0	0	0	1
1	70	2	23.8751	25.0995	4	6	2	2	1	2	2	1	1	3	1	2	2	0	0	0	1
1	37	1	20.2812	23.6614	5	5	2	2	3	1	2	1	1	5	2	2	2	0	0	1	1
0	49	3	19.1467	21.6441	3	2	2	2	1	2	2	1	1	3	2	2	2	0	0	0	1
1	58	1	20.3074	22.7583	5	5	2	2	3	1	2	1	1	3	2	2	2	0	0	0	1
1	51	2	22.4913	25.6055	4	4	2	2	2	2	2	1	1	5	2	2	2	0	0	0	1
1	60	3	25.0995	26.8923	3	2	2	2	2	1	2	1	1	4	2	2	2	0	0	0	1
1	50	1	16.955	20.7612	5	5	2	2	2	2	2	1	1	5	2	2	2	0	1	0	1
1	62	3	18.5568	19.0311	4	5	2	2	2	2	2	2	2	5	2	2	2	0	0	0	1
0	58	1	20.3125	21.0938	5	3	2	2	1	1	2	1	1	5	1	2	2	0	0	0	1
1	53	3	24.8016	21.2585	4	3	2	2	1	1	2	1	1	5	1	2	2	0	0	0	1
1	70	3	22.0317	23.0332	5	2	2	2	2	1	2	1	1	4	1	1	1	1	0	0	1
1	66	3	14.1723	15.5709	4	2	2	2	1	1	2	1	1	5	1	1	1	1	0	0	1
0	50	2	30.8185	22.3133	3	2	2	2	1	2	2	1	1	5	2	2	2	0	0	0	1
1	60	1	17.0993	23.939	5	2	2	2	1	2	2	1	1	3	2	1	1	1	0	0	1
0	53	2	24.974	20.5457	4	3	2	2	1	1	2	1	1	3	2	2	2	0	0	0	1
1	40	2	21.2585	19.257	5	3	2	2	2	2	2	1	1	5	2	2	2	0	0	0	1
0	36	3	23.4375	20.3125	4	3	2	2	1	1	2	1	1	5	2	1	1	1	0	0	1
0	62	2	22.7694	25.1532	4	6	5	2	2	2	2	1	1	4	2	2	2	0	0	0	1
1	70	3	18.8189	18.8189	4	3	2	2	2	1	2	1	1	4	1	2	2	0	1	0	1
0	33	2	18.342	20.8117	4	2	2	2	1	2	2	1	2	4	2	2	2	0	0	0	1
0	24	1	18.2222	22.2222	4	3	2	2	1	2	2	1	1	3	2	2	2	0	0	0	1
1	71	2	17.6114	17.301	4	2	2	2	1	2	2	1	1	2	1	1	1	1	0	0	1
1	53	2	26.5731	17.7154	3	5	2	2	2	2	2	1	1	5	2	2	2	0	0	2	1
1	73	1	17.7154	19.257	5	2	2	2	2	2	2	1	1	2	2	2	2	0	0	0	1
1	59	1	24.2215	22.4913	5	3	2	2	1	1	2	1	1	3	2	2	2	0	0	0	1
1	38	3	20.5486	20.7612	4	3	2	2	2	2	2	1	1	4	2	2	2	0	1	0	1
0	52	2	20.7008	18.8189	3	2	2	2	1	1	2	1	1	4	1	2	2	0	0	0	1
1	61	1	18.1449	19.487	5	3	2	2	1	1	2	1	1	3	2	2	2	0	0	0	1
1	60	2	16.5147	24.2215	4	4	2	2	1	2	3	1	1	5	2	2	2	0	0	0	1
0	49	1	22.0604	23.3091	5	2	2	2	1	3	2	1	1	5	2	2	2	0	0	0	1
1	46	3	20.984	22.5981	3	3	2	2	1	2	2	1	1	4	2	2	2	0	0	0	1
1	56	3	19.3772	21.4533	3	3	2	2	2	1	2	1	1	4	2	2	2	0	1	0	1
1	65	3	19.0311	18.5911	4	2	2	2	1	2	2	2	1	2	2	2	2	0	0	0	1
1	58	2	24.2188	21.7555	4	8	2	2	2	2	2	1	1	5	2	2	2	0	0	0	1
0	63	3	21.4844	16.937	5	1	5	2	2	2	2	1	1	3	1	2	2	0	2	0	1
1	57	2	18.3391	21.2031	5	3	2	2	2	1	2	1	1	4	2	2	2	0	0	0	1
0	68	2	23.1911	24.974	3	3	2	2	1	2	2	1	1	4	2	2	2	0	0	0	1
0	51	2	24.1415	21.1621	5	2	5	2	2	1	2	1	1	2	2	1	1	1	2	0	1
0	56	1	23.8751	22.0386	3	2	2	2	1	1	2	1	1	4	2	1	1	1	0	0	1
0	72	3	19.2234	23.3091	3	3	2	5	1	1	2	1	1	3	2	1	1	2	0	0	1
1	25	3	28.4055	17.3589	3	1	1	2	1	1	2	1	1	5	2	2	2	0	0	0	1
0	55	1	23.1473	24.7676	5	2	2	2	1	1	2	1	1	3	2	1	1	1	0	0	1
1	50	1	19.6094	19.052	4	3	2	2	2	2	2	2	2	2	2	2	2	0	2	0	1
0	51	1	17.4818	20.8117	4	2	2	2	3	2	2	1	1	5	2	2	2	0	0	0	1
1	75	1	15.0551	21.3039	2	2	2	2	2	2	2	1	1	3	2	2	2	0	0	0	1
1	53	2	19.0311	18.9292	4	2	2	2	1	2	2	1	1	1	2	2	2	0	1	0	1
0	61	1	26.2227	21.0962	3	1	5	2	1	2	1	1	1	3	1	2	2	0	0	0	1
0	63	1	26.6667	20.7756	3	6	2	2	1	2	2	1	1	5	2	2	2	0	0	0	1
1	40	1	18.6453	19.257	4	5	2	2	1	2	3	1	2	5	2	2	2	0	0	0	1
0	73	3	19.9792	24.6548	3	1	5	2	1	3	2	1	1	5	1	1	1	1	1	0	1
1	48	3	16.3721	16.3265	3	3	2	2	1	2	2	1	1	2	1	2	2	0	0	0	1
1	69	2	23.1837	21.2245	3	2	2	2	1	1	2	1	1	4	1	2	2	0	2	0	1
1	40	1	20.202	22.0386	4	6	1	1	3	1	1	1	1	4	2	2	2	0	0	0	1
1	39	1	20.202	22.0386	4	5	2	2	1	1	2	1	1	4	2	2	2	0	1	0	1
1	39	3	25.3515	25.3515	3	3	2	2	2	1	2	2	1	5	2	1	1	2	0	1	1
1	52	1	19.0311	16.901	4	5	2	2	1	3	2	1	1	6	2	2	2	0	1	0	1
1	40	3	20.9573	20.2812	3	3	2	2	2	2	2	1	1	3	2	2	2	0	2	0	1
0	60	2	24.974	22.4766	3	2	2	2	1	2	2	1	1	4	2	2	2	0	1	0	1
0	65	2	22.0317	23.4375	4	5	2	2	1	2	2	2	1	5	2	2	2	0	0	0	1
0	56	1	20.8117	21.6441	5	2	2	2	1	3	3	2	2	6	2	2	2	0	1	0	1
1	60	1	21.3599	25.711	4	5	2	2	2	1	2	2	1	6	1	2	2	0	0	0	1
1	31	2	29.0466	21.7051	5	3	2	2	2	1	3	1	1	6	1	2	2	0	1	0	1
0	37	1	26.4463	23.8751	4	4	2	2	2	3	2	1	1	5	2	2	2	0	0	1	1
1	66	2	20.7612	22.4913	3	2	2	2	2	2	2	1	1	3	2	1	1	1	1	0	1
1	45	3	19.8413	23.03	4	3	2	2	1	1	2	1	1	3	2	2	2	0	0	0	1
0	31	1	20.3125	23.4375	5	3	2	2	1	1	2	1	1	3	2	2	2	0	0	0	1
0	48	1	18.7305	22.8928	5	4	2	2	2	3	2	1	1	2	2	1	1	1	1	0	1
0	31	3	20.3125	19.5312	2	4	2	2	1	1	2	1	1	4	2	1	1	1	0	0	1
1	49	1	17.5556	20.7476	5	4	2	2	1	1	2	1	1	5	2	1	1	1	0	0	1
0	50	3	21.4844	20.3125	4	4	2	2	1	1	2	1	1	5	2	1	1	1	0	0	1
0	45	2	24.6548	21.3675	5	4	2	2	1	1	2	1	1	1	2	2	2	0	0	0	1
1	64	3	26.1719	19.7777	5	5	2	2	1	1	2	1	1	4	1	2	2	0	0	0	1
1	61	1	22.5827	24.1672	5	2	2	2	2	1	2	1	1	6	2	2	2	0	0	0	1
1	73	3	20.4152	20.4152	4	2	2	2	3	1	2	1	1	3	1	1	1	1	0	0	1
1	71	3	26.4236	24.7721	5	5	2	2	2	1	2	1	1	6	1	1	1	1	0	0	1
1	68	1	19.052	18.3655	5	3	2	2	1	1	2	1	1	6	2	2	2	0	0	0	1
0	29	1	21.6441	22.0604	5	3	2	2	1	1	2	1	1	6	2	2	2	0	0	0	1
0	57	1	31.1111	22.2222	5	4	5	2	1	1	2	2	1	6	2	1	1	2	0	0	1
1	51	1	22.7732	22.0386	5	5	2	2	2	1	2	1	1	3	2	2	2	0	0	0	1
1	57	3	25.4581	17.9282	5	2	2	2	2	1	2	1	1	6	2	1	1	1	0	0	1
0	50	2	23.5078	19.052	7	2	2	2	2	1	2	1	1	2	2	2	2	0	1	0	1
0	54	1	18.718	20.5442	5	5	2	2	1	1	2	1	1	2	2	1	1	1	1	0	1
0	72	2	22.151	19.5312	3	3	2	2	1	2	2	2	2	2	1	2	2	0	1	0	1
1	53	1	18.3391	18.5911	4	3	2	2	3	2	3	1	2	6	2	2	2	0	0	0	1
1	72	2	19.4674	17.0068	4	3	2	2	1	2	3	1	1	5	2	1	1	1	0	0	1
0	60	2	26.1066	19.433	4	5	2	2	3	1	3	1	2	3	2	2	2	0	0	1	1
0	64	1	20.3428	16.2331	5	7	2	2	2	1	2	2	1	6	1	2	2	0	0	0	1
1	39	1	26.2346	21.6049	4	3	2	2	1	1	2	1	1	6	2	2	2	0	0	0	1
1	38	1	21.4533	18.3391	3	5	2	2	1	1	3	1	1	5	2	2	2	0	2	2	1
1	64	3	22.0386	19.9594	2	2	2	1	2	1	2	1	1	3	2	1	1	3	0	0	1
1	48	1	23.1206	19.8177	5	3	2	2	1	3	2	2	2	2	2	2	2	0	0	0	1
1	29	1	22.7732	23.3355	3	4	2	2	2	1	2	1	1	6	2	2	2	0	0	0	1
0	50	2	24.4352	25.3906	5	4	2	2	1	1	2	2	1	5	2	2	2	0	0	0	1
0	50	1	18.6667	19.4771	5	5	2	2	1	3	3	2	2	5	2	2	2	0	0	0	1
1	25	1	17.5278	17.5278	2	3	1	2	1	2	2	1	1	6	2	2	2	0	1	1	1
1	57	1	19.721	19.9573	5	2	2	2	1	1	2	1	1	5	2	2	2	0	0	0	1
1	53	1	21.4357	22.3214	5	2	2	2	1	1	2	2	1	6	2	1	1	1	0	0	1
1	54	1	18.5185	21.1327	5	2	2	2	2	1	2	1	1	4	2	2	2	0	0	0	1
0	72	2	23.5304	20.0288	2	7	5	1	1	3	3	2	1	6	2	2	2	0	1	0	1
1	59	1	23.8751	23.8751	3	2	2	2	1	1	3	1	1	5	2	2	2	0	0	0	1
1	73	2	24.8016	19.487	2	2	2	1	2	1	4	1	1	3	2	1	1	1	0	0	1
1	63	1	18.7305	23.4375	4	6	2	2	1	1	2	1	1	4	2	2	2	0	0	0	1
1	66	1	18.3655	19.1001	5	2	2	2	2	1	3	1	1	4	1	2	2	0	2	0	1
1	49	2	25.0865	23.8751	5	2	3	2	2	1	3	1	1	6	2	2	2	0	0	0	1
1	73	3	19.0311	17.9592	5	5	2	2	1	1	2	1	1	4	1	1	1	1	1	0	1
1	66	2	17.301	20.7612	3	2	2	2	1	1	2	1	1	4	1	2	2	0	0	0	1
0	30	1	28.1625	25.8478	5	6	2	2	3	3	3	1	1	6	2	2	2	0	0	0	1
0	26	2	19.6311	18.2615	4	4	2	2	1	1	2	1	1	4	2	2	2	0	1	1	1
1	47	3	24.9108	21.048	5	3	2	2	3	1	2	1	1	6	1	1	1	2	0	0	1
1	54	3	26.2188	18.424	4	5	2	2	1	3	2	1	1	6	1	2	1	2	0	0	1
0	68	2	27.1203	20.5457	4	2	3	2	1	1	3	1	1	5	1	2	2	0	0	1	1
1	47	1	25.7117	17.2635	5	9	2	3	1	1	3	1	2	2	2	2	2	0	0	0	1
1	57	3	25.5296	20.1951	2	2	2	2	3	1	3	1	1	5	1	2	2	0	0	0	1
1	57	1	20.1956	21.0077	5	4	2	3	3	1	3	1	1	4	2	2	2	0	0	0	1
0	52	1	22.719	24.3418	5	5	2	2	1	1	2	1	1	4	2	2	2	0	0	0	1
1	66	2	19.8962	21.4533	4	2	2	2	1	1	2	1	1	5	2	1	1	1	0	0	1
0	57	2	20.9321	17.0874	5	3	4	4	2	2	2	1	1	3	1	1	1	1	0	0	1
0	48	2	25.2363	24.0346	5	3	2	2	1	1	2	1	1	4	2	1	1	1	0	0	1
1	46	3	22.3214	24.8016	5	3	2	2	2	1	2	1	1	5	2	1	1	1	1	0	1
0	50	1	20.7612	22.4913	5	2	2	2	1	3	2	1	1	2	2	2	2	0	0	0	1
0	70	1	22.8928	26.3702	4	2	2	2	1	1	2	1	1	3	2	2	2	0	0	0	1
0	67	1	22.8269	20.5442	5	6	2	2	1	2	2	1	1	5	2	1	1	2	0	0	1
1	47	1	20.3125	17.1468	4	3	2	2	1	2	2	1	1	5	2	2	2	0	0	0	1
1	67	1	22.4913	22.4913	5	4	2	2	2	2	2	1	1	5	2	2	2	0	0	0	1
0	67	2	18.424	22.7583	3	2	2	2	1	2	2	1	1	4	2	1	1	2	0	0	1
1	56	3	24.5089	21.0077	2	4	2	2	1	1	2	1	1	3	2	1	1	1	0	0	1
0	57	3	22.6409	24.7768	4	6	2	2	2	2	2	1	1	4	2	1	1	2	0	0	1
0	38	3	21.6311	24.8358	5	3	2	2	1	1	2	1	2	5	1	2	2	0	0	0	1
0	76	3	21.3675	22.1893	4	2	2	2	1	1	2	1	1	5	1	1	1	2	0	0	1
1	68	1	26.9531	21.0938	4	2	2	2	1	1	2	1	1	5	2	1	1	1	0	0	1
0	63	3	25.6312	23.4952	2	2	2	2	1	3	2	1	1	5	2	1	1	2	0	0	1
1	55	2	23.03	19.1327	4	2	2	2	1	1	2	1	1	4	2	1	1	1	0	0	1
0	44	3	20.0288	24.8358	3	3	2	2	1	1	2	1	1	6	2	1	1	1	0	0	1
1	46	2	25.7117	22.0386	5	2	5	2	1	3	2	2	2	5	2	2	2	0	0	1	1
1	63	3	22.5896	23.3067	2	2	2	2	2	2	2	1	1	2	2	1	1	1	1	0	1
0	38	1	22.2222	24.4444	5	4	2	2	1	2	2	1	1	4	2	2	2	0	0	0	1
0	67	2	21.6441	24.974	5	1	5	2	2	1	2	1	1	3	1	1	1	1	0	0	1
0	68	1	17.6254	20.83	5	6	2	2	1	1	2	1	1	5	2	2	2	0	0	0	1
1	50	1	18.9164	20.202	5	2	2	2	2	1	2	1	1	5	2	2	2	0	0	0	1
1	52	1	15.0204	17.5556	4	3	2	2	1	3	2	2	2	4	2	2	2	0	0	0	1
0	49	1	17.4818	19.9792	5	4	2	2	2	2	2	1	1	3	2	2	2	0	0	0	1
1	58	3	22.3214	21.0077	4	5	2	2	1	2	2	1	1	5	1	2	2	0	1	0	1
1	28	3	18.5568	18.2066	2	2	2	2	3	2	2	1	1	5	2	2	2	0	0	0	1
0	28	2	20.83	24.8358	5	3	2	2	2	1	2	1	1	5	2	2	2	0	0	0	1
1	54	3	22.2041	19.5918	5	3	2	2	1	1	2	1	1	3	2	1	1	1	0	0	1
1	64	3	23.6614	20.2812	3	2	2	2	1	1	2	1	1	5	1	1	1	1	0	0	1
1	36	3	22.0386	22.0386	5	3	2	2	2	1	2	1	1	5	2	2	2	0	0	0	1
0	78	1	17.4818	18.902	3	5	5	5	2	1	2	1	1	3	1	2	2	0	0	0	1
0	69	1	17.4818	21.6441	3	2	1	5	1	1	2	1	1	4	2	1	1	1	0	0	1
0	58	2	23.4375	19.5312	4	2	2	2	1	1	2	1	1	4	2	1	1	1	0	0	1
1	62	2	22.1453	18.8092	4	3	2	2	1	1	2	1	1	5	2	2	2	0	0	0	1
0	55	2	25.7819	16.1843	3	3	2	1	3	3	2	1	1	4	1	2	2	0	0	0	1
1	67	2	24.8016	25.3906	5	2	2	2	1	1	2	1	1	3	2	1	1	3	0	0	1
1	53	3	22.3094	20.2812	3	3	2	3	2	1	2	1	1	5	2	1	1	1	0	0	1
1	40	3	27.7744	22.6422	2	3	2	2	2	1	2	1	1	5	2	1	1	1	0	0	1
1	66	1	20.9366	18.3655	4	4	2	2	2	2	2	1	1	6	2	2	2	0	0	0	1
1	52	1	22.0932	22.5981	4	5	2	2	2	2	3	1	1	5	2	2	2	0	0	0	1
1	59	2	20.5761	22.4813	5	4	2	2	1	2	2	1	1	5	1	1	1	1	0	0	1
0	63	2	18.718	22.0711	4	6	2	2	2	1	2	1	1	1	2	2	2	0	0	0	1
1	66	1	24.6904	26.6728	5	3	2	1	1	2	2	1	1	5	2	1	1	1	1	0	1
1	67	3	21.9671	26.5731	2	8	2	2	1	3	2	1	1	5	1	1	1	1	0	0	1
0	52	3	17.4818	18.7305	4	5	2	2	1	1	2	1	1	5	2	1	1	1	0	0	1
0	39	3	20.061	21.9899	3	3	2	2	2	1	3	1	1	5	2	2	1	1	0	0	1
1	66	2	22.7583	23.6614	1	4	9	1	1	2	2	1	1	4	1	2	2	0	0	0	1
0	58	3	23.8054	27.0552	5	2	2	2	2	1	2	1	1	3	1	1	1	1	1	1	1
1	61	1	22.231	24.0238	5	2	2	2	2	1	2	1	1	6	2	1	1	1	0	0	1
1	56	2	22.8329	19.5312	5	6	2	2	1	1	2	1	1	4	2	2	2	0	0	0	1
1	70	3	15.0555	20.2812	4	2	2	2	2	1	2	1	1	6	2	1	1	1	0	0	1
0	45	2	21.6311	20.0288	3	3	2	2	1	1	2	1	1	4	2	2	2	0	0	0	1
1	30	1	21.2585	21.2585	5	4	2	2	2	1	2	1	1	5	2	1	1	1	0	0	1
0	39	3	23.1247	20.2848	5	5	2	2	2	1	2	1	1	6	2	1	1	1	0	0	1
0	32	2	30.8248	25.0995	5	3	2	2	1	1	2	1	1	4	2	1	1	1	0	0	1
1	39	2	18.937	19.5682	5	5	2	2	2	1	2	1	1	4	2	1	1	1	1	0	1
1	71	3	21.8776	23.2438	5	2	2	2	1	1	2	1	2	3	2	1	1	1	0	0	1
1	42	3	23.9995	22.913	2	4	2	2	1	1	2	1	1	5	2	2	2	0	2	0	1
0	67	3	19.6283	20.7031	3	3	5	2	1	1	2	2	1	3	2	2	2	0	0	0	1
1	56	3	22.3094	20.2812	5	14	2	2	1	1	2	1	1	3	2	2	1	1	0	0	1
0	65	1	17.4818	20.5457	2	3	2	2	2	1	2	1	1	3	1	2	2	1	0	0	1
1	74	2	25.7117	18.7783	4	5	2	2	3	3	1	1	1	5	1	2	2	0	1	0	1
0	45	1	22.5827	28.2284	3	6	2	2	3	3	2	1	1	5	2	1	1	1	0	0	1
0	64	1	24.0346	19.2277	3	1	5	2	2	1	1	2	1	5	1	2	2	0	0	0	1
1	50	1	18.6453	19.721	5	3	2	2	1	1	3	1	1	4	2	1	1	1	1	0	1
1	63	2	20.7612	20.7612	3	3	2	2	1	3	3	1	1	4	2	2	2	0	0	0	1
1	28	1	22.6757	23.7387	4	4	2	2	3	1	3	1	2	6	2	2	2	0	2	0	1
0	64	1	18.902	20.4294	5	4	1	2	1	2	2	2	1	2	1	2	2	0	0	0	1
0	45	2	23.6128	18.7305	1	3	2	1	1	2	1	1	1	4	2	1	1	1	0	0	1
0	64	1	17.3333	20	2	2	2	2	2	1	3	1	1	4	2	2	2	0	0	0	1
0	63	3	16.6493	19.563	4	4	2	2	2	1	2	2	2	1	1	2	2	0	0	0	1
0	70	1	24.6548	26.0375	3	4	5	2	2	2	2	2	1	3	1	1	2	0	1	0	1
0	66	1	18.1787	22.5069	5	3	2	3	1	1	3	1	1	3	2	2	2	0	0	0	1
0	49	3	26.6389	22.3133	5	4	2	2	3	1	2	1	1	3	2	2	2	0	0	0	1
1	53	3	21.9899	20.9572	2	1	2	2	2	1	2	1	1	5	2	1	1	1	0	0	1
1	60	1	14.6924	19.1001	5	3	2	2	1	1	3	2	2	6	1	2	2	0	0	0	1
1	28	2	20.8666	19.9594	5	3	2	2	3	2	3	1	2	5	2	1	1	1	0	0	1
1	68	1	20.3125	21.4844	2	4	5	3	3	3	2	2	1	3	2	2	2	0	1	0	1
0	49	1	21.4844	21.4844	5	2	2	2	1	3	3	1	1	5	2	2	2	0	0	0	1
0	39	2	22.9398	21.7865	1	4	1	2	1	2	2	1	1	5	2	2	2	0	2	0	1
1	47	2	19.487	21.5139	5	4	1	2	1	1	2	1	1	6	2	2	2	0	0	0	1
1	66	1	20.202	25.7117	5	2	2	2	2	1	2	1	1	6	2	2	2	0	0	0	1
0	59	1	28.3987	23.9361	4	2	2	2	1	1	2	2	2	6	2	2	2	0	0	0	1
0	59	1	22.4766	17.898	3	3	2	3	1	1	2	2	1	2	2	1	1	1	1	0	1
0	69	3	22.8928	20.5457	3	2	2	2	2	1	2	1	1	4	1	2	1	2	0	0	1
0	66	1	18.4911	25.4767	5	4	2	2	3	1	1	1	1	5	2	2	2	0	0	0	1
1	51	3	22.4913	24.2215	3	4	2	2	3	1	2	1	1	6	1	1	1	1	0	0	1
1	55	3	19.1001	18.3655	5	4	2	2	1	1	2	1	1	5	2	1	1	1	0	0	1
1	68	1	26.4236	24.7721	4	2	2	2	1	1	3	1	1	5	2	2	2	0	0	0	1
1	52	1	22.8624	24.7676	5	4	2	2	1	1	2	1	1	4	2	1	1	1	0	0	1
1	50	1	19.052	20.1951	5	4	2	2	2	2	3	2	1	5	1	1	1	1	0	0	1
1	39	1	23.4375	22.0317	5	4	2	2	2	1	2	1	1	5	2	2	2	0	0	0	1
0	59	1	26.8386	20.7031	5	5	2	2	1	1	2	1	1	3	2	1	1	2	0	0	1
0	52	1	18.2868	16.5289	4	2	2	2	2	1	2	1	1	6	2	2	2	0	0	0	1
0	30	2	20.3954	20.3954	5	2	2	1	1	1	2	1	2	5	2	1	1	1	0	1	1
0	51	2	21.5625	20.9572	4	2	2	2	1	2	2	1	1	1	1	2	2	0	0	0	1
0	26	2	17.9999	20.202	4	1	1	2	2	1	2	1	1	5	2	2	2	0	0	0	1
1	68	2	19.0311	21.9713	4	5	2	2	2	2	2	1	1	5	2	2	2	0	1	0	1
1	48	2	27.3588	19.0311	3	2	2	2	1	2	3	1	1	5	2	1	1	1	0	0	1
0	65	1	22.0317	21.7555	5	8	2	2	1	2	2	1	1	5	1	2	2	0	0	0	1
1	57	1	21.2245	27.6817	4	2	2	2	2	2	2	1	1	5	2	1	1	1	0	0	1
1	61	3	18.8707	21.7738	4	5	2	2	2	1	2	1	1	4	1	1	1	1	1	0	1
0	50	2	19.5556	21.0517	4	3	2	2	2	2	3	1	1	2	2	2	2	0	1	0	1
0	57	2	23.2816	23.1911	3	4	2	2	2	2	2	1	1	4	2	2	2	0	0	0	1
1	52	1	21.4533	21.9713	4	6	2	2	2	2	2	2	2	5	2	2	2	0	0	0	1
1	58	1	22.7583	23.4586	5	4	2	2	1	2	2	2	2	2	2	2	2	0	0	0	1
0	52	1	21.8522	22.8928	5	4	2	2	1	3	2	1	1	3	2	2	2	0	0	0	1
0	51	2	25.6312	20.8117	5	2	2	2	1	2	2	1	1	6	1	1	1	1	0	1	1
1	68	2	19.5312	22.5827	4	2	2	2	2	2	2	1	1	5	2	2	2	0	0	0	1
1	66	1	20.5151	18.726	4	6	2	2	1	2	2	1	2	5	1	2	2	0	0	0	1
1	53	1	20.4152	23.03	4	3	2	2	2	2	3	1	2	4	2	2	2	0	0	0	1
0	58	3	28.578	21.4844	4	4	2	2	1	2	2	1	1	5	1	1	1	2	0	0	1
1	45	3	19.563	20.7008	4	3	2	2	2	2	2	1	2	2	2	2	2	0	0	0	1
0	34	3	22.8928	20.8117	4	3	2	2	1	3	2	1	1	3	2	2	2	0	0	0	1
1	65	3	17.6309	18.8189	4	4	2	2	2	2	3	1	1	5	1	2	2	0	0	0	1
1	30	2	23.4375	27.0051	3	4	2	2	2	2	2	1	1	6	2	2	2	0	0	0	1
1	55	1	26.0375	28.3987	4	5	2	2	1	1	2	1	1	5	2	2	2	0	2	0	1
1	58	1	25.1559	21.0077	4	5	2	2	1	2	2	1	1	5	2	2	2	0	2	0	1
1	39	2	17.7154	17.7154	4	3	2	2	1	2	2	1	2	5	2	2	2	0	1	0	1
1	58	1	23.1405	19.2336	2	4	2	2	1	2	2	1	1	4	2	2	2	0	1	0	1
0	68	3	22.5827	24.0882	4	6	2	2	1	2	3	1	2	4	2	2	2	0	0	0	1
1	41	1	21.2585	19.721	5	3	2	2	1	2	2	1	1	5	2	1	1	1	1	0	1
1	48	3	21.2585	25.0995	4	3	2	2	2	2	2	1	1	3	2	2	2	0	2	0	1
1	32	2	23.8751	25.3444	5	4	2	2	1	3	2	1	1	6	2	1	1	1	2	1	1
1	40	3	26.4463	26.4463	4	3	2	2	3	2	2	1	1	5	3	2	2	0	0	0	1
0	65	2	24.4946	20.8889	3	2	2	2	1	2	2	1	1	3	1	1	2	2	0	0	1
1	67	3	21.3041	20.5151	4	5	2	2	3	2	2	1	1	3	2	1	1	1	0	0	1
0	49	3	22.0317	24.0346	2	3	2	2	2	2	2	1	1	4	1	2	2	0	0	0	1
1	56	1	27.3356	22.4913	5	2	2	2	2	1	2	1	1	2	2	2	2	0	0	0	1
0	58	1	17.4251	17.9688	5	8	2	2	1	2	2	1	1	4	2	2	2	0	1	0	1
1	49	2	18.3391	22.4913	3	4	2	2	2	2	2	1	1	5	2	1	1	1	0	0	1
1	49	3	24.5089	19.6072	3	5	2	2	2	2	2	1	1	5	1	1	1	1	1	1	1
1	52	1	19.3625	20.4382	5	2	2	2	1	1	2	1	1	5	2	1	1	1	0	0	1

## Sheet: note
labour	'1' is 'working before colorectal cancer onset';'2'is 'not working before colorectal cancer onset ';'3' is 'retired colorectal cancer onset'
activity	'1'is 'sit almost all day';'2'is 'standing or walking 1-2 hours one day';'3'is 'standing or walking 3-4 hours one day';'4'is 'standing or walking 5-6 hours one day';'5'is 'standing or walking more than 7 hours one day'
marriage	'1'is 'unmarried';'2'is'first marrage';'3'is 'remarrage';'4'is 'divorce';'5'is 'widowed'
character	'1'is 'rashness and irascibility';'2' is 'mediate';'3'is 'in contrast to A'
mood	'1'is 'strong self regulatory';'2'is 'mediate';'3' is 'weak self regulatory'
relationship	'1' is 'very well';'2' is 'well';'3' is 'ordinary';'4' is 'bad';'5'is 'very bad'
depress or not	'1'is 'yes';'2'is 'no'
trauma	'1' is 'no trauma in recent years';'2'is 'have trauma in recent years'
sleeping	'1' is 'sleeping less than 4 hours';'2' is 'sleeping between 4-5 hours';'3'is 'sleeping between 5-6 hours';'4' is 'sleeping between 6-7 hours';'5' is 'sleeping between 7-8 hours';'6' is 'sleeping more than 8 hours'
exercise or not	'1' is 'yes';'2' is 'no'
cholesterol	'1'is 'cholesterol checked';'2'is 'no cholesterol checked'
blood_fat	'1'is 'blood_fat checked';'2'is 'no blood_fat checked'
fat_results	'0' is 'null';'1' is 'normal';'2' is 'a little higher';'3' is 'high'
cancer1	first-degree relatives have rectal cancer;'0' is 'no';'1' is 'yes'
cancer2	secondary relatives have rectal cancer;'0' is 'no';'1' is 'yes'
