# Supplementary material for: Building Up a Robust Risk Mathematical Platform to Predict Colorectal Cancer
Source: Hindawi journal article supplement (doi:10.1155/2017/8917258), 2017-01-01
Supplement: f1 [file 8917258.f1.zip › Supplementary/Supplementary S3.xlsx]

## Sheet: data
class	smoking	spouse_smoking	drinking	smoke_and_drink	tea	coffee	white_wine	beer
0	3	3	3	3	1	1	0	0
0	3	3	3	3	1	1	0	0
0	3	3	3	3	3	1	0	0
0	3	1	3	3	1	1	0	0
0	3	1	3	3	1	1	0	0
0	3	3	1	3	3	1	30	0
0	3	1	3	2	1	1	0	0
0	1	3	3	2	5	1	0	0
0	3	3	3	3	4	1	0	0
0	3	3	3	3	5	2	0	0
0	3	1	3	3	1	1	0	0
0	3	1	3	3	1	1	0	0
0	3	1	3	3	4	1	0	0
0	3	3	1	3	3	2	120	500
0	3	3	3	3	5	1	0	0
0	1	3	3	2	1	1	0	0
0	1	3	1	2	5	1	200	35
0	3	3	3	3	1	1	0	0
0	2	2	3	2	5	2	0	0
0	3	3	3	2	1	1	0	0
0	1	3	1	3	3	1	50	250
0	3	3	3	3	5	1	0	0
0	3	2	3	3	1	1	0	0
0	2	3	2	2	3	1	1	0
0	3	3	3	3	1	1	0	0
0	1	3	1	2	1	1	10	0
0	3	3	3	3	1	1	0	0
0	3	3	1	3	3	1	10	0
0	3	1	3	3	1	1	0	0
0	1	3	3	2	1	1	0	0
0	1	3	3	2	5	1	0	0
0	3	2	3	3	1	1	0	0
0	3	1	3	3	1	1	0	0
0	3	1	3	3	1	1	0	0
0	1	3	3	2	5	1	0	0
0	3	3	3	3	5	1	0	0
0	3	1	3	3	1	1	0	0
0	1	3	3	2	5	1	0	0
0	1	3	3	2	5	2	0	0
0	3	1	1	2	5	1	0	0
0	3	3	1	3	1	1	7	0
0	2	3	2	1	3	1	750	0
0	3	1	3	3	2	1	0	0
0	1	3	3	2	5	1	0	0
0	3	1	3	3	1	1	0	0
0	3	3	3	3	1	1	0	0
0	2	3	2	2	1	1	100	0
0	1	3	3	2	1	1	0	0
0	1	3	1	2	1	1	125	600
0	3	3	3	3	5	1	0	0
0	3	2	3	3	1	1	0	0
0	3	1	3	3	1	1	0	0
0	1	3	1	3	5	1	100	0
0	1	3	3	2	1	1	0	0
0	3	3	1	2	3	1	4	35
0	3	1	3	3	1	1	0	0
0	3	3	3	3	1	1	0	0
0	3	3	3	3	1	2	0	0
0	3	3	3	3	1	1	0	0
0	3	3	3	3	5	1	0	0
0	3	3	3	3	1	1	0	0
0	3	1	3	3	1	1	0	0
0	3	3	3	3	1	1	0	0
0	3	3	3	3	5	1	0	0
0	2	3	1	2	1	1	3.5	0
0	1	3	3	2	1	1	0	0
0	2	3	3	0	2	1	0	0
0	3	3	3	3	1	1	0	0
0	2	3	2	2	3	1	3.5	0
0	3	1	3	3	1	1	0	0
0	1	3	1	2	5	1	50	0
0	3	1	3	3	3	1	0	0
0	3	3	3	3	3	2	0	0
0	3	1	3	3	1	1	0	0
0	3	3	3	3	5	1	0	0
0	3	1	2	2	2	1	1.75	0
0	3	3	3	3	2	1	0	0
0	2	3	3	2	5	2	0	0
0	1	3	1	2	3	1	300	500
0	1	3	3	2	5	1	0	0
0	3	3	3	3	4	1	0	0
0	1	3	1	2	5	1	50	0
0	3	3	1	2	5	1	50	0
0	3	3	3	3	2	1	0	0
0	3	3	3	3	1	1	0	0
0	3	1	3	3	1	2	0	0
0	1	3	3	2	1	1	0	0
0	1	3	1	2	5	1	10	0
0	3	1	3	3	1	1	0	0
0	1	3	1	2	1	1	0	240
0	3	3	3	3	1	1	0	0
0	3	3	3	3	1	1	0	0
0	3	3	3	3	1	1	0	0
0	1	3	3	2	1	1	0	0
0	1	3	3	2	5	1	0	0
0	3	3	3	3	1	1	0	0
0	3	3	1	2	3	3	250	400
0	1	3	3	2	5	1	0	0
0	3	3	3	3	4	1	0	0
0	2	3	3	2	1	1	0	0
0	2	3	1	3	5	1	100	0
0	3	1	3	3	1	1	0	0
0	3	3	3	3	5	1	0	0
0	3	3	1	2	2	1	3.5	0
0	3	3	3	3	4	1	0	0
0	3	3	3	3	3	1	0	0
0	3	3	3	3	1	1	0	0
0	3	1	3	3	1	1	0	0
0	3	1	3	3	1	1	0	0
0	3	1	3	3	5	1	0	0
0	3	2	3	3	1	1	0	0
0	1	3	1	1	1	2	0	1800
0	2	3	1	1	1	1	20	320
0	1	3	1	2	2	1	200	250
0	1	3	3	2	5	1	0	0
0	1	3	1	1	5	2	150	120
0	3	3	2	3	5	2	25	120
0	1	3	1	3	1	1	100	0
0	2	3	3	3	5	1	0	0
0	3	1	3	3	1	1	0	0
0	3	3	3	3	1	1	0	0
0	3	1	3	3	1	1	0	0
0	3	1	3	3	3	1	0	0
0	3	3	1	3	5	2	14	900
0	3	0	3	3	4	2	0	0
0	3	3	3	3	3	1	0	0
0	3	3	1	2	1	1	0	0
0	3	3	3	3	3	2	0	0
0	1	3	2	1	1	1	250	0
0	2	3	1	3	1	1	40	0
0	1	3	1	2	1	1	10	600
0	1	3	1	2	5	1	200	0
0	3	1	3	3	1	1	0	0
0	2	3	1	2	4	1	80	480
0	3	1	3	3	5	1	0	0
0	2	3	1	3	1	1	3.5	0
0	3	2	3	3	1	1	0	0
0	1	3	3	2	5	1	0	0
0	3	3	3	3	1	1	0	0
0	1	3	1	2	1	1	50	120
0	2	3	3	2	1	1	0	0
0	1	3	3	2	4	1	0	0
0	3	3	3	3	1	1	0	0
0	2	3	2	3	1	1	0	0
0	1	3	1	1	1	1	40	160
0	3	1	3	3	1	1	0	0
0	1	3	3	2	1	1	0	0
0	2	3	2	2	5	1	80	600
0	1	3	1	2	4	1	50	0
0	3	1	3	3	1	1	0	0
0	3	3	3	3	3	1	0	0
0	3	3	3	3	1	1	0	0
0	1	3	2	1	1	1	75	120
0	3	3	1	3	1	1	0	0
0	1	3	3	2	2	1	0	0
0	3	1	3	3	4	2	0	0
0	3	3	3	3	1	1	20	0
0	3	3	3	3	1	1	0	0
0	1	3	1	2	4	1	75	250
0	3	1	3	3	1	1	0	0
0	3	1	3	3	1	1	0	0
0	3	1	3	3	1	1	0	0
0	1	3	1	3	1	1	50	0
0	1	3	1	3	1	1	20	0
0	1	3	1	1	1	1	50	0
0	3	1	3	3	1	1	0	0
0	3	3	1	3	5	1	3.5	600
0	3	1	3	3	1	1	0	0
0	3	3	3	3	5	2	0	0
0	3	1	3	3	1	1	0	0
0	3	3	3	3	5	1	0	0
0	1	3	1	2	3	1	450	0
0	3	3	3	3	4	1	0	0
0	1	3	1	2	1	1	200	0
0	3	3	3	3	1	1	0	0
0	3	3	3	3	5	1	0	0
0	1	3	1	3	1	1	150	0
0	3	3	3	3	1	1	0	0
0	1	3	3	2	5	1	0	0
0	2	3	3	2	2	1	0	0
0	3	1	3	3	1	1	0	0
0	1	3	1	1	5	1	10	0
0	1	3	1	1	1	1	200	0
0	3	3	3	3	5	1	0	0
0	3	1	2	3	1	1	20	0
0	3	2	3	3	1	1	0	0
0	1	3	3	2	5	2	0	0
0	3	1	3	3	2	1	0	0
0	3	3	3	3	1	2	0	0
0	1	3	3	2	5	1	0	0
0	3	1	3	3	1	1	0	0
0	1	3	1	3	5	2	10	0
0	1	3	1	2	5	2	100	500
0	3	3	3	3	1	1	0	0
0	3	3	1	3	1	1	100	0
0	2	3	3	2	3	1	0	0
0	3	1	3	3	1	1	0	0
0	3	3	3	3	5	1	0	0
0	3	1	3	3	1	1	0	0
0	3	2	3	3	1	1	0	0
0	2	3	3	2	1	1	0	0
0	3	1	3	3	1	1	0	0
0	3	3	3	3	1	1	0	0
0	1	3	3	2	1	1	0	0
0	1	3	3	2	1	1	0	0
0	3	1	3	3	1	1	0	0
0	1	3	1	2	1	1	37.5	400
0	1	3	1	3	5	1	100	500
0	3	1	3	3	1	1	0	0
0	3	3	3	3	1	1	0	0
0	3	1	3	3	1	1	0	0
0	1	3	3	2	1	1	0	0
0	1	3	1	2	1	1	50	250
0	1	3	1	2	1	1	10	0
0	1	3	3	2	1	1	0	0
0	1	3	1	1	5	1	250	0
0	2	3	3	2	1	1	0	0
0	3	1	3	3	1	2	0	0
0	3	3	3	3	1	1	0	0
0	3	1	3	3	1	1	0	0
0	3	3	3	3	1	1	0	0
0	3	3	3	3	1	1	0	0
0	1	3	1	1	3	1	30	0
0	3	1	3	3	1	1	0	0
0	3	1	3	3	1	1	0	0
0	3	3	3	3	1	1	0	0
0	1	3	3	2	1	1	0	0
0	3	3	3	3	1	1	0	0
0	3	3	3	3	1	1	0	0
0	3	3	1	3	1	1	50	0
0	3	3	3	3	4	1	0	0
0	3	1	3	3	1	1	0	0
0	2	3	2	2	1	1	0	0
0	3	3	3	3	3	1	0	0
0	1	3	1	1	1	1	10	0
0	1	3	3	1	5	2	0	0
0	1	1	2	2	1	1	200	250
0	1	3	1	2	1	1	200	250
0	1	3	1	2	5	1	50	250
0	3	3	3	3	5	1	0	0
0	3	1	3	3	1	1	0	0
0	3	3	3	3	4	1	0	0
0	1	3	3	2	5	1	0	0
0	3	3	3	3	1	1	0	0
0	2	3	3	2	1	1	0	0
0	3	2	3	3	1	1	0	0
0	3	3	1	3	1	1	75	500
0	3	3	1	2	5	2	30	750
0	3	3	3	3	1	1	0	0
0	3	3	3	3	1	1	0	0
0	3	1	3	3	1	1	0	0
0	3	3	3	3	1	1	0	0
0	3	3	3	3	1	1	0	0
0	1	3	1	1	5	1	20	0
0	1	3	2	1	1	1	50	175
0	3	3	3	3	5	1	0	0
0	3	1	3	3	1	1	0	0
0	1	3	3	2	1	1	0	0
0	3	3	3	3	1	1	0	0
0	1	1	1	1	5	1	50	70
0	3	3	3	3	1	1	0	0
0	1	3	1	1	3	1	0	80
0	1	3	3	2	1	1	0	0
0	3	1	3	3	1	1	0	0
0	3	3	3	3	1	1	0	0
0	1	3	3	2	1	1	0	0
0	3	3	3	3	1	1	0	0
0	3	3	3	3	1	1	0	0
0	1	3	3	2	1	1	0	0
0	2	3	3	2	1	1	0	0
0	3	3	3	3	3	1	0	0
0	1	3	3	2	1	1	0	0
0	1	3	3	2	1	1	0	0
0	3	3	3	3	5	1	0	0
0	1	3	1	1	4	1	30	360
0	2	3	1	1	1	1	100	0
0	3	3	3	3	1	1	0	0
0	1	3	1	3	5	1	200	0
0	3	1	3	3	1	1	0	0
0	2	3	3	2	5	1	0	0
0	1	3	3	2	2	1	0	0
0	3	3	3	3	1	1	0	0
0	3	1	3	3	1	1	0	0
0	3	1	1	2	1	1	0	0
0	3	3	3	3	1	1	0	0
0	3	3	3	3	3	1	0	0
0	1	3	2	3	1	1	0	35
0	1	3	1	1	5	2	125	750
0	2	3	1	2	8	1	100	0
0	3	3	3	3	3	1	0	0
0	3	3	3	3	1	1	0	0
0	2	3	3	2	2	1	0	0
0	3	3	3	3	3	1	0	0
0	3	3	3	3	1	1	0	0
0	3	3	3	3	5	1	0	0
0	1	3	3	2	1	1	0	0
0	3	3	1	3	1	1	50	0
0	2	3	2	3	1	1	120	0
0	3	3	3	3	1	1	0	0
0	3	3	3	3	5	2	0	0
0	3	3	3	3	5	2	0	0
0	3	1	3	3	1	1	0	0
0	3	3	3	3	1	1	0	0
0	1	3	3	2	4	2	0	0
0	3	3	3	3	2	1	0	0
0	3	3	3	3	1	1	0	0
0	1	3	3	2	5	2	0	0
0	3	1	3	3	3	2	0	0
0	3	3	3	3	1	2	0	0
0	3	3	3	3	5	1	0	0
0	3	3	3	3	1	1	0	0
0	3	1	3	3	1	1	0	0
0	1	3	3	2	1	1	0	0
0	3	1	3	3	1	1	0	0
0	3	1	3	3	3	2	0	0
0	3	3	3	3	1	1	0	0
0	3	1	3	3	5	1	0	0
0	3	3	3	3	1	1	0	0
0	3	1	3	3	1	1	0	0
0	1	3	1	1	5	1	75	1300
0	3	1	3	3	1	1	0	0
0	3	3	3	3	1	1	0	0
0	3	1	3	3	1	1	0	0
0	1	3	2	2	1	1	0	0
0	1	3	3	2	5	2	0	0
0	3	2	3	3	1	1	0	0
0	3	1	3	3	1	1	0	0
0	1	3	1	1	1	1	140	0
0	3	2	3	3	1	1	0	0
0	3	3	3	3	1	1	0	0
0	2	3	2	2	5	1	200	600
0	3	3	3	3	1	1	0	0
0	3	1	3	3	1	1	0	0
0	3	3	3	3	5	1	0	0
0	3	3	3	3	1	1	0	0
0	3	3	3	3	1	1	0	0
0	3	1	3	3	1	1	0	0
0	3	1	3	3	1	1	0	0
0	3	3	3	3	1	1	0	0
0	3	1	3	3	1	1	0	0
0	3	3	3	3	1	1	0	0
0	3	1	3	3	5	2	0	0
0	3	3	1	3	5	1	100	0
0	3	1	3	3	5	1	0	0
0	3	3	3	3	1	1	0	0
0	2	3	3	2	5	1	0	0
0	1	3	1	2	1	1	200	0
0	3	1	3	3	1	1	0	0
0	3	3	3	3	1	1	0	0
0	1	3	2	2	1	1	80	100
0	3	3	3	3	5	1	0	0
0	3	1	3	3	1	1	0	0
0	3	1	3	3	1	1	0	0
0	3	3	3	3	1	1	0	0
0	3	3	1	3	4	1	10	600
0	3	3	3	3	1	1	0	0
0	3	2	3	3	1	1	0	0
0	3	3	3	3	1	1	0	0
0	3	3	3	3	2	1	0	0
0	3	3	3	3	1	1	0	0
0	3	3	3	3	1	1	0	0
0	3	2	3	3	1	1	0	0
0	1	3	1	2	5	1	200	250
0	3	1	3	2	1	1	0	0
0	1	3	1	2	5	1	100	0
0	1	3	3	2	5	1	0	0
0	3	3	3	2	1	1	0	0
0	3	3	3	2	1	1	0	0
0	1	3	3	2	3	1	0	0
0	1	3	1	1	1	1	50	0
0	3	1	3	2	5	1	0	0
0	3	1	3	2	1	1	0	0
0	1	3	1	2	1	1	150	250
0	3	1	3	2	5	1	0	0
0	3	1	3	2	1	1	0	0
0	3	1	3	2	1	1	0	0
0	3	2	3	2	5	1	0	0
0	1	3	3	2	5	1	0	0
0	3	3	1	2	5	1	0	600
0	1	3	3	2	2	1	0	0
0	1	3	3	2	1	1	0	0
0	3	3	3	2	1	1	0	0
0	1	3	1	2	3	2	80	100
0	3	3	3	2	5	2	0	0
0	2	15	2	2	3	1	0	0
0	1	1	1	2	5	1	100	480
0	3	3	3	2	5	1	0	0
0	1	3	3	2	5	1	0	0
0	1	3	3	2	5	1	0	0
0	3	2	3	2	1	1	0	0
0	3	1	3	2	1	1	0	0
0	3	3	3	2	1	1	0	0
0	3	3	3	2	1	1	0	0
0	3	1	3	2	1	1	0	0
0	1	3	3	2	5	1	0	0
0	3	1	3	2	1	1	0	0
0	2	1	1	3	1	1	37.5	0
0	1	3	1	1	1	1	37.5	200
0	1	3	1	3	1	1	10	0
0	2	3	2	2	3	1	0	0
0	3	3	3	2	1	1	0	0
0	1	3	3	2	1	1	0	0
0	3	1	3	2	1	1	0	0
0	3	3	3	2	3	1	0	0
0	2	3	1	3	1	1	20	0
0	3	1	3	2	1	1	0	0
0	1	3	1	2	1	1	10	0
0	1	3	1	2	5	1	100	400
0	1	3	1	3	1	1	0	100
0	3	1	3	2	1	1	0	0
0	1	3	3	2	3	1	0	0
0	1	3	1	1	5	1	50	1200
0	1	3	3	2	3	1	0	0
0	3	2	3	2	1	1	0	0
0	3	1	3	2	1	1	0	0
0	1	3	2	2	1	1	0	0
0	3	3	3	2	1	1	0	0
0	1	3	1	1	5	1	500	0
0	3	1	2	2	1	1	0	0
0	1	3	3	2	1	1	0	0
0	1	3	3	2	5	1	0	0
0	1	3	3	2	5	1	0	0
0	1	3	3	2	5	1	0	0
0	2	1	3	2	1	1	0	0
0	1	3	3	2	5	1	0	0
0	3	3	3	2	1	1	0	0
0	3	1	3	2	1	1	0	0
0	3	1	3	2	1	1	0	0
0	1	1	3	2	1	1	0	0
0	3	1	3	2	1	2	0	0
0	1	3	1	2	4	1	150	100
0	3	3	3	2	1	1	0	0
0	3	3	3	2	5	2	0	0
0	3	1	3	2	1	1	0	0
0	3	3	3	2	1	1	0	0
0	1	3	1	1	2	1	37.5	120
0	3	3	1	3	5	1	25	0
0	1	3	3	2	1	1	0	0
0	3	1	3	2	1	1	0	0
0	1	3	3	2	5	1	0	0
0	3	1	3	2	1	2	0	0
0	1	3	3	2	5	1	0	0
0	1	3	3	2	1	1	0	0
0	3	3	3	2	1	1	0	0
0	3	1	3	2	1	1	0	0
0	1	3	1	1	5	1	500	1000
0	1	3	1	2	1	1	10	100
0	3	2	3	2	1	1	0	0
0	3	1	3	2	1	1	0	0
0	3	3	3	2	1	1	0	0
0	2	3	3	2	3	1	0	0
0	3	3	3	2	5	1	0	0
0	2	3	1	3	5	1	100	0
0	3	3	3	2	1	1	0	0
0	3	1	3	2	5	1	0	0
0	1	3	1	2	5	1	0	0
0	3	3	3	2	1	1	0	0
0	3	3	3	2	3	1	0	0
0	3	3	3	2	4	1	0	0
0	3	3	3	2	1	1	0	0
0	3	3	3	2	5	1	0	0
0	2	3	1	2	5	1	150	0
0	3	3	3	2	5	1	0	0
0	3	3	1	3	5	2	0	500
0	3	3	3	2	2	1	0	0
0	1	3	2	2	1	1	200	0
0	3	1	3	2	3	1	0	0
0	3	3	3	2	3	1	0	0
0	1	3	3	2	5	2	0	0
0	3	1	3	2	1	1	0	0
0	3	1	3	2	4	1	0	0
0	3	3	3	2	3	1	0	0
0	1	3	3	2	1	1	0	0
0	3	1	3	2	1	1	0	0
0	3	3	1	3	1	1	5	0
0	1	3	1	3	5	1	300	70
0	3	3	3	2	1	1	0	0
0	1	3	3	2	1	1	0	0
0	3	3	3	2	1	1	0	0
0	1	3	3	2	3	1	0	0
0	3	1	3	2	5	1	0	0
0	1	3	2	1	5	1	200	0
0	3	3	3	2	1	1	0	0
0	3	3	3	2	1	1	0	0
0	2	3	2	1	5	1	150	0
0	3	3	3	2	1	1	0	0
0	1	3	1	2	1	1	150	0
0	3	1	3	2	5	1	0	0
0	3	3	3	2	5	2	0	0
0	3	1	3	2	1	1	0	0
0	3	1	3	2	1	1	0	0
0	3	1	3	2	1	1	0	0
0	3	1	3	2	1	1	0	0
0	3	3	3	2	1	1	0	0
0	3	1	3	2	1	1	0	0
0	3	3	3	2	5	1	0	0
0	1	3	1	2	5	2	10	125
0	1	3	1	2	3	1	60	0
0	3	3	3	2	3	1	0	0
0	3	1	3	2	1	1	0	0
0	3	3	3	2	5	1	0	0
0	3	1	3	2	2	1	0	0
0	1	3	1	1	5	1	50	0
0	1	3	3	2	1	1	0	0
0	1	3	1	2	2	1	50	0
0	3	3	3	2	1	1	0	0
0	1	3	2	3	1	1	100	1250
0	3	1	3	2	5	1	0	0
0	3	1	3	2	1	1	0	0
0	3	3	3	2	5	1	0	0
0	3	3	3	2	5	1	0	0
0	3	3	3	2	3	1	0	0
0	1	3	3	2	5	1	0	0
0	3	2	3	2	1	1	0	0
0	2	3	2	2	1	1	150	0
0	3	3	3	2	1	1	0	0
0	3	1	3	2	1	1	1.4	0
0	3	3	3	2	5	1	0	0
0	2	3	3	2	1	1	0	0
0	3	3	3	2	1	1	0	0
0	3	3	3	2	1	1	0	0
0	3	3	3	2	5	1	0	0
0	3	3	3	2	5	1	0	0
0	3	3	1	3	1	1	200	720
0	1	3	1	3	3	1	7	480
0	3	3	3	2	1	1	0	0
0	3	3	3	2	1	1	0	0
0	1	3	1	1	1	1	30	100
0	3	1	3	2	1	1	0	0
0	3	3	3	2	3	1	0	0
0	3	1	3	2	1	1	0	0
0	3	3	3	2	4	1	0	0
0	3	3	3	2	1	1	0	0
0	3	2	3	2	1	1	0	0
0	3	3	3	2	1	1	0	0
0	3	3	3	2	1	1	0	0
0	3	3	3	2	4	1	0	0
0	1	3	1	1	1	1	0	400
0	1	3	1	2	5	1	50	0
0	3	3	3	2	5	1	0	0
0	1	3	1	3	5	1	100	0
0	1	3	1	1	1	1	0	300
0	1	3	3	2	5	1	0	0
0	3	1	3	2	1	1	0	0
0	3	1	3	2	1	1	0	0
0	2	3	1	1	5	1	5	14
0	3	3	3	2	4	2	0	0
0	3	3	3	2	1	1	0	0
0	3	3	3	2	4	1	0	0
0	3	3	3	2	1	1	0	0
0	3	3	3	2	1	1	0	0
0	1	3	3	1	2	1	0	0
0	3	3	1	2	1	1	100	500
0	1	3	3	2	5	1	0	0
0	1	3	2	2	5	1	300	0
0	3	2	3	2	1	1	0	0
0	3	1	3	2	1	1	0	0
0	3	3	3	2	2	1	0	0
0	1	3	1	2	1	1	50	0
0	3	1	3	2	1	1	0	0
0	1	1	1	2	1	1	0	175
0	1	3	3	2	5	2	0	0
0	1	3	1	2	1	1	20	100
0	3	1	3	2	1	1	0	0
0	1	3	2	2	3	1	0	0
0	2	3	2	3	5	1	0	0
0	3	3	3	2	1	1	0	0
0	3	3	1	2	4	1	0	0
0	1	3	3	2	1	1	0	0
0	1	3	1	2	1	1	200	0
0	3	3	3	2	1	1	0	0
0	1	3	1	1	5	1	250	1500
0	1	3	1	1	5	1	50	250
0	3	3	3	2	2	1	0	0
0	3	1	3	2	1	1	0	0
0	3	3	3	2	5	1	0	0
0	3	3	3	2	1	1	0	0
0	3	1	3	2	1	1	0	0
0	3	1	3	2	1	1	0	0
0	3	3	3	2	1	1	0	0
0	3	3	3	2	1	1	0	0
0	1	3	1	2	5	1	50	0
0	1	3	3	2	3	1	0	0
0	1	3	1	1	1	1	100	0
0	3	3	3	2	5	1	0	0
0	3	3	3	2	1	1	0	0
0	3	1	3	2	1	1	0	0
0	1	3	1	1	1	1	300	0
0	3	1	3	2	1	1	0	0
0	1	3	1	2	5	2	75	0
0	3	1	3	2	1	1	0	0
0	3	3	3	2	1	1	0	0
0	1	3	3	2	5	2	0	0
0	3	3	3	2	5	1	0	0
0	1	3	3	2	5	1	0	0
0	3	1	3	2	2	1	0	0
0	1	2	3	2	5	1	0	0
0	3	3	3	2	1	1	0	0
0	3	3	3	2	5	1	0	0
0	3	3	3	2	1	2	0	0
0	1	3	1	1	4	1	25	0
0	3	1	3	2	1	1	0	0
0	1	3	3	2	3	1	0	0
0	3	1	3	2	5	1	0	0
0	1	3	1	2	5	1	80	0
0	3	3	3	2	5	1	0	0
0	3	3	3	2	1	1	0	0
0	1	3	1	1	5	1	0	500
0	3	3	3	2	1	1	0	0
0	1	3	3	2	5	1	0	0
0	3	3	3	2	1	1	0	0
0	3	2	3	2	1	1	0	0
0	1	3	1	3	5	1	20	500
0	1	3	1	3	1	1	25	0
0	3	1	3	2	1	1	0	0
0	1	3	3	2	1	1	0	0
0	1	3	3	2	1	1	0	0
0	1	3	1	1	1	1	250	0
0	3	3	1	3	5	1	200	0
0	1	3	1	1	5	1	8.75	0
0	1	3	3	2	5	1	0	0
0	3	1	3	2	1	1	0	0
0	3	1	3	2	1	1	0	0
0	1	3	1	2	5	1	0	0
0	3	3	1	2	3	2	0	0
0	3	3	3	2	4	2	0	0
0	3	3	3	2	5	1	0	0
0	3	3	3	2	1	1	0	0
0	1	3	1	2	1	1	0	0
0	3	3	3	2	5	1	0	0
0	1	3	1	2	1	1	0	0
0	2	3	1	1	5	1	0	0
0	3	3	3	2	1	2	0	0
0	3	1	3	2	3	1	0	0
0	3	1	3	2	1	1	0	0
0	3	1	3	2	1	1	0	0
0	3	1	3	2	1	1	0	0
0	1	3	1	1	5	1	200	0
0	3	1	3	2	1	1	0	0
0	3	3	3	2	3	1	0	0
0	1	3	1	2	5	1	250	0
0	3	3	3	2	1	1	0	0
0	3	3	3	2	1	1	0	0
0	1	1	1	2	5	2	125	0
0	1	3	1	2	3	1	17.5	0
0	1	3	3	2	5	1	0	0
0	3	3	3	2	1	1	0	0
0	3	3	3	2	1	1	0	0
0	1	3	3	2	1	1	0	0
0	1	3	1	2	1	1	0	120
0	2	3	1	2	5	1	10	60
0	3	3	3	2	1	1	0	0
0	3	3	3	2	4	2	0	0
0	1	3	3	2	1	1	0	0
0	1	3	3	2	3	1	0	0
0	3	3	3	2	1	1	0	0
0	3	3	3	2	5	1	0	0
1	2	3	1	3	5	1	150	0
1	3	3	3	2	1	1	0	0
0	3	2	3	2	1	1	0	0
0	1	3	3	2	1	1	0	0
0	3	3	1	3	4	1	100	0
0	2	3	3	3	1	1	0	0
0	3	3	1	2	1	1	0	35
0	3	1	3	2	1	2	0	0
0	3	3	1	3	4	1	80	0
0	1	3	1	1	3	1	50	0
0	1	3	1	3	5	1	200	0
0	3	3	3	2	1	1	0	0
0	1	3	3	2	1	1	0	0
0	3	3	3	2	1	1	0	0
0	1	3	3	2	2	1	0	0
0	2	1	1	3	1	1	50	0
0	3	1	3	2	1	1	0	0
0	3	1	3	2	1	1	0	0
0	1	3	1	3	3	2	50	384
0	1	3	3	2	1	1	0	0
0	2	3	2	2	5	1	125	0
0	1	3	1	3	5	1	50	0
0	1	3	1	2	1	1	80	400
0	1	3	1	2	1	1	25	0
0	3	3	3	2	3	1	0	0
0	1	3	3	2	3	1	0	0
0	3	3	3	2	1	1	0	0
0	2	3	2	3	2	1	6	0
0	3	3	1	3	1	1	50	240
0	3	3	3	2	5	1	0	0
0	3	2	3	2	1	1	0	0
0	3	1	3	2	1	1	0	0
0	3	3	2	3	3	1	25	0
0	2	3	1	1	3	1	50	120
0	1	3	3	2	3	1	0	0
0	3	3	2	3	4	1	50	600
0	3	1	3	2	1	1	0	0
0	3	3	3	2	1	1	0	0
0	2	3	3	2	5	1	0	0
0	3	2	3	2	5	1	0	0
0	3	1	3	2	5	1	0	0
0	3	1	3	2	5	1	0	0
0	1	3	1	1	5	1	12.5	500
0	3	2	2	3	1	1	10	125
0	3	3	3	2	1	1	0	0
0	1	3	1	2	5	1	250	600
0	1	3	1	3	1	1	75	100
0	3	1	3	2	1	1	0	0
0	1	3	1	3	3	1	0	42
0	3	3	3	2	1	1	0	0
0	3	1	1	3	1	1	50	0
0	1	3	1	3	3	1	0.4	3.5
0	2	3	3	2	2	1	0	0
0	3	3	3	2	1	1	0	0
0	3	3	3	2	1	1	0	0
0	3	1	3	2	1	1	0	0
0	3	1	3	2	1	1	0	0
0	3	1	3	2	1	1	0	0
0	3	1	3	2	3	1	0	0
0	1	3	1	1	5	1	30	0
0	3	2	3	2	1	1	0	0
0	3	1	3	2	1	1	0	0
0	3	3	3	2	4	1	0	0
0	1	3	3	2	3	1	0	0
0	3	3	3	2	1	1	0	0
0	3	1	3	2	2	1	0	0
0	1	3	1	1	1	1	0	0
0	2	1	2	2	1	1	100	0
0	3	1	3	2	1	1	0	0
0	3	2	3	2	5	1	0	0
0	3	1	3	2	1	1	0	0
0	1	3	3	2	5	1	0	0
0	1	3	1	2	1	1	0	0
0	3	1	3	2	5	1	0	0
0	1	3	1	2	5	1	30	0
0	3	1	1	3	1	1	10	100
0	3	3	3	2	1	1	0	0
0	1	3	1	1	1	1	100	0
0	3	3	2	3	1	1	125	0
0	3	3	3	2	3	1	0	0
0	1	3	1	3	5	1	10	0
0	1	3	1	1	5	1	100	600
0	1	3	1	2	5	1	100	0
0	1	3	3	2	5	1	0	0
0	3	3	3	2	1	1	0	0
0	1	3	1	1	5	1	200	0
0	2	3	2	1	1	1	25	0
0	1	3	3	2	3	1	0	0
0	3	2	3	2	3	2	0	0
0	3	3	3	2	1	1	0	0
0	3	3	3	2	3	2	0	0
0	3	3	3	2	3	1	0	0
0	3	3	3	2	3	1	0	0
0	3	3	3	2	1	1	0	0
0	3	1	3	2	1	1	0	0
0	3	3	3	2	2	1	0	0
0	3	3	1	3	5	1	7	70
0	3	1	3	2	3	1	0	0
0	2	3	3	2	3	1	0	0
0	3	2	3	2	1	1	0	0
0	3	3	3	2	1	1	0	0
0	3	1	3	2	1	1	0	0
0	2	3	2	2	1	1	0	0
0	1	3	3	2	1	1	0	0
0	2	3	1	1	1	1	100	0
0	3	1	3	2	1	1	0	0
0	3	3	3	2	5	1	0	0
0	3	3	3	2	1	1	0	0
0	3	3	3	2	3	1	0	0
0	1	3	3	2	1	1	0	0
0	3	3	3	2	5	2	0	0
0	1	3	1	2	1	1	25	600
0	3	1	3	2	1	1	0	0
0	3	1	3	2	1	1	0	0
0	3	1	3	2	1	1	0	0
0	1	3	1	3	4	1	250	0
0	3	3	3	2	1	1	0	0
0	1	3	1	1	1	1	10	10
0	3	1	3	2	1	1	0	0
0	3	3	3	2	1	1	0	0
0	3	3	3	2	1	1	0	0
0	3	1	3	2	1	1	0	0
0	3	3	3	2	1	1	0	0
0	3	1	3	2	5	1	0	0
0	1	3	3	2	5	1	0	0
0	3	3	3	2	1	1	0	0
0	1	1	3	1	1	3	0	0
0	3	3	3	2	1	1	0	0
0	3	1	3	2	1	1	0	0
0	1	1	1	2	1	2	50	100
0	3	1	1	3	5	1	50	0
0	1	3	1	3	2	1	250	0
0	3	3	3	2	1	1	0	0
0	3	3	3	2	1	1	0	0
0	3	3	3	2	5	1	0	0
0	1	3	1	2	5	1	100	0
0	2	3	2	23	1	1	0	0
0	3	1	3	2	1	1	0	0
0	3	3	3	2	5	2	0	0
0	3	3	3	2	1	1	0	0
0	3	3	3	2	1	1	0	0
0	1	3	1	2	1	1	50	0
0	1	3	1	2	5	1	100	250
0	2	3	2	2	5	1	200	1600
0	2	3	3	2	5	1	150	0
0	3	3	3	2	1	1	0	0
0	1	3	1	1	5	1	300	250
0	3	3	3	2	1	1	0	0
0	3	3	1	2	1	1	4.9	28
0	3	3	3	2	1	1	0	0
0	1	3	2	2	5	1	0	0
0	3	3	3	2	1	1	0	0
0	1	3	1	1	5	1	10	0
0	3	3	3	2	1	1	0	0
0	3	3	3	2	1	1	0	0
0	1	3	1	3	5	2	250	0
0	3	3	3	2	1	1	0	0
0	1	3	3	2	1	1	0	0
0	3	3	3	2	1	1	0	0
0	3	3	3	2	1	1	0	0
0	3	3	3	2	1	1	0	0
0	1	1	2	2	3	1	100	210
0	1	3	3	2	5	1	0	0
0	1	3	1	2	1	1	75	100
0	1	3	1	1	2	1	150	0
0	1	3	3	2	2	1	0	0
0	3	3	3	2	5	1	0	0
0	3	3	3	2	1	1	0	0
0	3	3	3	2	1	1	0	0
0	3	3	3	2	1	1	0	0
0	1	3	3	2	5	1	0	0
0	3	3	3	2	5	1	0	0
0	1	3	2	3	1	1	70	0
0	1	1	1	1	2	3	7	120
0	3	3	3	2	1	1	0	0
0	3	1	3	2	1	1	0	0
0	3	3	3	2	1	1	0	0
0	1	3	1	1	3	1	60	600
0	3	3	3	2	5	2	0	0
0	3	3	3	2	1	1	0	0
0	3	3	1	3	5	1	60	42
0	1	3	1	3	5	1	125	1500
0	3	3	3	2	1	1	0	0
0	1	3	3	2	5	1	0	0
0	2	3	3	2	1	1	0	0
0	3	2	3	2	1	1	0	0
0	3	3	3	2	5	2	0	0
0	3	3	3	2	1	1	0	0
0	1	3	1	2	5	1	15	120
0	2	3	3	2	5	1	0	0
0	1	3	3	2	1	1	0	0
0	3	3	3	2	1	1	0	0
0	3	3	3	2	1	1	0	0
0	3	3	3	2	5	1	0	0
0	3	3	3	2	1	1	0	0
0	1	3	3	2	1	1	0	0
0	3	3	3	2	1	1	0	0
0	3	1	3	2	1	1	0	0
0	3	2	3	2	1	1	0	0
1	1	3	1	1	1	1	75	0
1	1	3	1	1	5	2	100	250
1	1	3	3	2	5	1	0	0
1	2	3	1	2	5	1	80	0
1	3	1	3	2	1	1	0	0
1	3	3	3	2	5	1	0	0
1	3	1	3	2	1	1	0	0
1	3	3	3	2	5	1	0	0
1	3	3	3	2	1	1	0	0
1	3	3	3	2	1	1	0	0
1	3	3	3	2	1	1	0	0
1	1	3	1	53	2	1	150	0
1	2	3	1	1	5	1	500	0
1	1	3	1	1	1	1	7	1000
1	3	3	2	3	3	1	50	0
1	2	3	2	2	5	1	37.5	80
1	3	1	3	2	1	3.1	0	0
1	3	3	3	2	5	1	0	0
1	3	3	3	2	5	1	0	0
1	3	3	3	2	1	1	0	0
1	1	3	1	2	5	1	250	1000
1	3	3	1	3	2	1	120	1200
1	3	1	3	2	1	1	0	0
1	3	2	3	2	5	1	0	0
1	1	3	1	1	5	1	750	0
1	3	3	3	2	1	1	0	0
1	3	3	3	2	1	1	0	0
1	3	1	3	2	1	1	0	0
1	3	1	3	2	5	1	0	0
1	3	3	3	2	1	1	0	0
1	3	1	3	2	1	1	0	0
1	3	3	3	2	2	1	0	0
1	3	3	2	3	1	1	50	0
1	3	3	3	2	5	1	0	0
1	3	3	3	2	1	1	0	0
1	2	3	2	1	1	1	70	0
1	3	3	3	2	1	1	0	0
1	2	3	3	2	5	1	0	0
1	3	3	3	2	1	1	0	0
1	3	3	3	2	1	1	0	0
1	3	3	3	2	1	1	0	0
1	3	1	3	2	1	1	0	0
1	1	3	1	1	5	1	40	0
1	1	1	2	1	5	1	500	0
1	3	1	3	2	1	1	0	0
1	3	1	3	2	1	1	0	0
1	3	1	3	2	1	1	0	0
1	3	3	3	2	1	1	0	0
1	2	3	1	2	5	2	75	0
1	2	3	3	2	5	1	0	0
1	1	3	1	1	3	1	10	1750
1	2	3	1	3	1	1	40	500
1	3	1	3	2	3	2	0	0
1	1	3	3	2	1	2	0	0
1	3	3	3	2	1	1	0	0
1	2	3	2	3	5	1	30	120
1	3	3	3	2	1	1	0	0
1	1	3	1	1	1	1	50	500
1	1	3	1	2	2	1	50	0
1	3	3	1	3	1	1	20	50
1	1	3	1	2	2	1	100	0
1	3	3	3	2	3	1	0	0
1	3	3	1	2	4	1	50	0
1	3	1	3	2	1	1	0	0
1	3	3	3	2	1	1	0	0
1	3	1	3	2	1	1	0	0
1	3	3	1	2	5	1	100	0
1	3	3	3	2	1	1	0	0
1	2	3	3	2	5	1	0	0
1	3	1	3	2	1	1	0	0
1	2	3	2	3	4	1	20	25
1	1	3	1	3	1	1	400	0
1	1	3	3	2	3	1	0	0
1	3	3	3	2	5	2	0	0
1	3	1	3	2	1	1	0	0
1	1	3	1	1	5	1	100	750
1	1	3	1	2	3	1	10.5	0
1	3	3	3	2	1	1	0	0
1	2	3	3	3	1	1	0	0
1	1	3	1	2	1	1	0	1000
1	3	3	3	2	5	1	0	0
1	3	1	3	2	1	1	0	0
1	3	3	3	2	1	1	0	0
1	3	3	3	2	1	1	0	0
1	1	3	3	2	5	1	0	0
1	3	3	3	2	1	1	0	0
1	3	1	3	2	1	1	0	0
1	3	3	1	3	1	1	40	900
1	3	1	3	2	1	1	0	0
1	1	3	3	2	5	1	0	0
1	3	1	3	2	1	1	0	0
1	3	3	3	2	1	1	0	0
1	3	3	3	2	5	1	0	0
1	3	1	1	2	3	1	0	3.5
1	3	1	3	2	1	1	0	0
1	3	3	1	3	1	1	80	320
1	3	3	3	2	1	1	0	0
1	3	1	3	2	1	1	0	0
1	3	3	3	2	1	1	0	0
1	3	1	3	2	5	1	0	0
1	3	1	3	2	1	1	0	0
1	3	2	3	2	5	1	0	0
1	3	1	3	2	1	1	0	0
1	3	3	3	2	3	1	0	0
1	3	2	1	2	1	1	300	0
1	1	3	3	2	1	1	0	0
1	2	3	3	2	5	1	0	0
1	3	3	3	2	1	1	0	0
1	3	1	3	2	1	1	0	0
1	3	3	3	2	1	1	0	0
1	1	3	1	2	5	1	50	0
1	3	3	2	2	3	1	2	0
1	1	3	1	2	1	1	20	240
1	1	3	1	1	5	1	25	0
1	3	1	3	2	1	1	0	0
1	3	3	3	2	1	1	0	0
1	1	3	1	2	2	1	7	120
1	1	3	3	2	1	1	0	0
1	3	1	3	2	1	1	0	0
1	1	3	1	3	4	1	0	40
1	2	3	1	3	5	1	125	0
1	3	3	3	2	5	1	0	0
1	1	3	3	2	1	1	0	0
1	1	3	3	2	1	1	0	0
1	3	1	3	2	1	1	0	0
1	3	1	3	2	1	1	0	0
1	1	3	1	1	4	1	40	0
1	3	1	3	2	5	1	0	0
1	1	3	1	3	5	1	5	0
1	1	3	3	2	5	1	0	0
1	1	3	3	2	4	1	0	0
1	1	3	3	2	4	3	0	0
1	3	3	3	2	2	1	0	0
1	1	3	1	1	1	1	75	0
1	1	3	1	1	3	2	40	3.5
1	1	1	3	2	5	1	0	0
1	3	1	3	2	3	1	0	0
1	3	3	3	2	5	1	0	0
1	1	3	1	1	1	1	200	0
1	3	3	1	3	1	1	20	0
1	1	3	1	3	5	1	50	500
1	1	3	3	2	1	1	0	0
1	1	3	1	1	1	1	50	0
1	3	1	3	2	1	1	0	0
1	3	3	3	2	1	1	0	0
1	1	3	3	2	1	1	0	0
1	3	2	3	2	1	1	0	0
1	1	3	1	2	2	2	10.5	0
1	2	3	1	2	2	1	50	0
1	3	3	1	2	1	1	35	250
1	1	3	2	2	1	1	150	17.5
1	1	3	3	2	5	1	0	0
1	3	3	3	2	1	1	0	0
1	3	3	3	2	4	1	0	0
1	2	3	2	1	4	1	100	240
1	1	3	1	2	5	1	50	0
1	1	1	3	2	1	1	0	0
1	1	3	1	2	5	1	100	0
1	3	1	3	2	4	1	0.5	0
1	3	3	3	2	1	1	0	0
1	3	1	3	3	1	1	3.5	42
1	3	3	2	2	1	1	3.5	0
1	1	3	1	2	5	1	100	0
1	2	2	2	3	1	1	5	0
1	3	1	2	3	1	1	50	0
1	2	3	3	2	5	1	0	0
1	1	3	3	2	1	1	0	0
1	1	3	2	3	1	1	50	0
1	2	3	3	2	1	1	0	0
1	3	1	3	2	1	1	0	0
1	2	3	3	3	5	1	1.75	35
1	1	3	3	2	1	1	0	0
1	1	3	1	2	5	1	200	84
1	3	3	3	2	1	1	0	0
1	3	1	3	2	5	1	0	0
1	3	3	3	2	2	1	0	0
1	1	3	3	2	1	1	0	0
1	3	3	3	2	1	1	0	0
1	3	3	2	3	3	1	300	0
1	3	3	3	2	2	1	0	0
1	3	1	3	2	5	1	0	0
1	3	1	1	2	1	1	12.5	0
1	1	3	2	2	1	1	300	0
1	3	1	3	2	1	2	0	0
1	1	3	1	3	1	1	50	0
1	3	2	3	2	1	1	0	0
1	3	3	3	2	1	1	0	0
1	1	3	1	2	1	1	250	0
1	3	2	3	2	1	1	0	0
1	1	3	3	2	1	1	0	0
1	1	3	1	1	1	1	50	0
1	3	3	3	2	1	1	0	0
1	3	1	3	2	1	1	0	0
1	1	3	1	2	5	1	50	0
1	3	1	3	2	1	1	0	0
1	3	3	3	2	1	1	0	0
1	3	1	3	2	1	1	0	0
1	1	3	1	3	1	1	50	140
1	1	3	3	2	1	1	0	0
1	3	1	3	2	1	1	0	0
1	3	3	3	2	1	1	0	0
1	3	1	3	2	1	1	0	0
1	1	3	3	2	5	1	0	0
1	1	3	3	2	5	1	0	0
1	3	1	3	2	1	1	0	0
1	3	1	3	2	1	1	0	0
1	1	3	2	2	5	1	50	0
1	1	3	3	2	5	1	0	0
1	3	3	3	2	4	1	0	0
1	1	3	1	3	5	2	200	0
1	1	3	3	2	5	1	0	0
1	3	1	3	2	1	1	0	0
1	3	1	3	2	1	1	0	0
1	3	1	3	2	1	2	0	0
1	3	1	3	2	1	1	0	0
1	1	3	1	2	1	1	7	168
1	3	3	3	2	3	2	0	0
1	3	3	3	2	1	1	0	0
1	3	1	3	2	1	1	0	0
1	1	3	3	2	5	1	0	0
1	1	3	1	2	5	1	100	0
1	1	3	2	2	2	1	20	600
1	3	3	3	2	1	1	0	0
1	1	3	1	2	3	1	65	0
1	1	3	1	1	1	1	100	480
1	3	3	2	3	4	2	300	600
1	1	3	3	3	5	1	0	0
1	1	3	1	2	5	1	100	0
1	3	1	3	2	1	1	0	0
1	1	3	1	1	5	2	500	1800
1	2	3	2	2	1	1	25	0
1	3	3	3	2	5	1	0	0
1	3	3	3	2	2	1	0	0
1	1	3	2	1	3	1	300	600
1	3	3	3	2	2	1	0	0
1	2	3	3	2	3	1	0	0
1	3	2	3	2	5	2	0	0
1	3	3	3	2	1	1	0	0
1	2	3	3	2	1	1	0	0
1	3	1	3	2	1	1	0	0
1	3	3	3	2	1	1	0	0
1	2	3	2	2	1	1	200	500
1	2	3	2	3	1	1	50	0
1	2	3	2	1	3	1	75	0
1	2	3	2	3	1	1	50	0
1	1	3	1	2	5	2	100	0
1	3	3	2	3	1	1	25	0
1	1	3	1	2	1	1	40	120
1	3	3	3	2	1	1	0	0
1	3	1	3	2	3	1	0	0
1	3	3	3	2	1	1	0	0
1	3	3	3	2	3	2	0	0
1	2	3	1	2	1	1	150	400
1	1	3	3	2	1	1	0	0
1	3	3	3	2	1	1	0	0
1	1	3	2	1	2	1	100	0
1	3	3	3	2	1	1	0	0
1	3	1	3	2	3	2	0	0
1	3	2	3	2	4	1	0	0
1	3	3	3	2	4	1	0	0
1	1	3	1	2	1	1	300	0
1	3	1	3	2	1	1	0	0
1	3	3	3	2	1	1	0	0
1	3	3	3	2	1	1	0	0
1	1	3	3	2	1	1	0	0
1	1	3	1	1	3	1	100	500
1	3	3	3	2	1	1	0	0
1	3	3	3	2	5	1	0	0
1	1	3	3	2	5	1	0	0
1	3	3	3	2	1	1	0	0
1	3	1	3	2	1	1	0	0
1	1	3	3	2	5	2	0	0
1	1	3	3	2	5	1	0	0
1	1	3	3	2	1	1	0	0
1	1	3	1	2	2	1	1	13
1	3	3	3	2	1	1	0	0
1	1	3	1	2	1	1	14	35
1	3	3	3	2	3	1	0	0
1	3	3	3	2	1	1	0	0
1	3	3	3	2	1	1	0	0
1	3	1	3	2	2	1	0	0
1	1	3	3	2	5	2	0	0
1	1	3	1	1	1	1	20	200
1	3	3	3	2	1	1	0	0
1	1	3	1	3	5	1	100	0
1	1	3	2	1	1	1	500	600
1	3	3	3	2	1	1	0	0
1	3	1	3	2	1	1	0	0
1	3	3	3	2	1	1	0	0
1	1	3	1	1	5	1	100	120
1	3	3	3	2	1	1	0	0
1	3	3	3	2	1	1	0	0
1	3	3	3	2	1	1	0	0
1	2	3	3	2	5	1	0	0
1	3	3	1	3	1	1	10	0
1	3	3	3	2	2	1	0	0
1	1	2	1	2	5	1	200	0
1	3	3	1	3	1	1	30	0
1	3	3	3	2	3	1	0	0
1	3	1	3	2	1	1	0	0
1	1	3	1	3	3	1	50	0
1	3	3	1	3	1	1	100	0
1	3	1	3	2	1	1	0	0
1	3	1	3	2	4	1	0	0
1	3	1	3	2	2	1	0	0
1	2	3	2	1	1	1	80	0
1	3	3	3	2	5	1	0	0
1	3	3	3	2	4	2	0	0
1	3	2	3	2	5	1	0	0
1	1	3	2	2	1	2	125	750
1	1	3	1	1	3	3	17.5	500
1	3	3	3	2	5	1	0	0
1	1	3	1	1	4	1	24.5	0
1	1	3	1	1	3	1	100	500
1	3	1	2	3	2	1	10	0
1	3	3	3	2	1	1	0	0
1	1	3	3	2	2	1	0	10
1	1	3	1	2	1	1	37.5	0
1	1	3	2	2	2	1	3.5	0
1	1	1	1	1	5	1	0	0
1	3	3	3	2	1	1	0	0
1	1	3	1	2	1	1	20	0
1	3	3	3	2	5	1	0	0
1	1	3	3	2	3	1	0	0
1	1	1	3	2	3	1	0	0
1	1	1	3	2	1	1	0	0
1	3	3	3	2	1	1	0	0
1	3	3	2	2	5	1	100	0
1	3	3	3	2	1	1	0	0
1	3	3	3	2	1	1	0	0
1	3	1	3	2	2	1	0	0
1	3	3	3	2	5	1	0	0
1	3	3	3	2	1	1	0	0
1	3	3	3	2	1	1	0	0
1	3	1	3	2	3	2	0	0
1	1	3	1	1	1	1	100	0
1	2	3	2	2	5	2	40	200
1	1	3	1	2	1	1	1.4	0
1	3	3	3	2	1	1	0	0
1	3	3	3	2	2	1	0	0
1	3	3	3	2	1	1	0	0
1	3	3	3	2	3	1	0	0
1	1	3	1	2	2	1	200	600
1	3	3	3	2	1	1	0	0
1	3	1	3	2	1	1	0	0
1	3	1	3	2	5	1	0	0
1	3	3	3	2	1	1	0	0
1	3	3	3	2	1	1	0	0
1	3	3	1	3	5	1	50	100
1	3	3	3	2	1	1	0	0
1	1	3	1	1	3	1	125	0
1	3	1	3	2	3	1	0	0
1	3	2	3	2	1	1	0	0
1	3	3	3	2	1	1	0	0
1	3	2	3	2	1	1	0	0
1	3	3	2	3	5	1	20	21
1	3	1	3	2	1	1	0	0
1	3	3	3	2	3	2	0	0
1	3	3	3	2	5	2	0	0
1	1	3	1	1	5	1	50	120
1	1	3	1	2	5	1	75	0
1	3	1	3	2	4	1	0	0
1	3	1	3	2	1	1	0	0
1	3	2	3	2	1	1	0	0
1	3	3	3	2	3	1	0	0
1	1	3	1	2	2	1	300	0
1	3	1	3	2	1	1	0	0
1	3	3	3	2	5	1	0	0
1	1	3	1	1	5	1	0	360
1	3	3	3	2	2	1	0	0
1	1	3	1	1	5	2	7	500
1	3	3	3	2	1	1	0	0
1	1	3	3	2	5	1	0	0
1	3	3	3	2	3	1	0	0
1	3	1	2	2	1	1	0	0
1	3	3	3	2	1	1	0	0
1	2	3	3	2	2	2	0	0
1	3	1	3	2	5	1	0	0
1	2	3	3	2	1	1	0	0
1	3	3	3	2	1	2	0	0
1	1	3	1	1	5	1	20	320
1	1	3	1	2	5	1	50	0
1	1	3	3	2	5	1	0	0
1	1	3	1	2	5	1	500	0
1	3	1	3	2	1	1	0	0
1	1	3	1	2	1	1	10	0
1	1	3	1	1	5	1	250	0
1	1	3	1	3	1	1	100	0
1	3	1	3	2	5	1	0	0
1	3	1	3	2	1	2	0	0
1	2	3	3	2	4	1	0	0
1	3	3	3	2	1	1	0	0
1	2	3	3	2	1	1	0	0
1	3	3	1	2	5	1	100	0
1	2	3	3	2	5	1	0	0
1	3	3	1	2	1	1	50	0
1	1	3	3	2	1	1	0	0
1	3	3	3	2	1	1	0	0
1	3	1	3	2	1	1	0	0
1	3	3	1	3	5	2	200	1200
1	1	3	1	1	5	1	100	0
1	2	3	1	2	1	1	20	0
1	3	3	3	2	1	1	0	0
1	3	3	3	2	1	1	0	0
1	1	3	1	2	1	1	150	300
1	2	1	1	2	1	1	5	0
1	3	3	1	2	2	1	80	0
1	1	3	3	2	1	1	0	0
1	3	1	2	2	1	1	30	0
1	3	3	3	2	1	1	0	0
1	1	3	3	2	1	1	0	0
1	1	3	3	2	5	1	0	0
1	3	3	3	2	1	1	0	0
1	3	1	3	2	2	1	0	0
1	3	3	3	2	1	1	0	0
1	3	3	3	2	1	1	0	0
1	3	1	3	2	1	1	0	0
1	3	3	3	2	1	1	0	0
1	3	1	3	2	1	1	0	0
1	3	1	3	2	1	1	0	0
1	1	3	3	2	5	1	0	0
1	3	3	1	2	5	1	1.5	600
1	3	3	3	2	1	1	0	0
1	1	3	3	2	1	1	0	0
1	3	1	3	2	1	1	0	0
1	3	2	3	2	1	1	0	0
1	1	3	1	3	5	1	300	0
1	1	3	1	3	1	1	125	0
1	3	3	3	2	5	1	0	0
1	3	3	3	2	2	1	0	0
1	3	2	3	2	1	1	0	0
1	3	3	1	2	3	1	20	0
1	1	3	1	2	5	1	0	1280
1	3	3	3	2	1	1	0	0
1	2	3	1	3	5	1	3.5	0
1	2	3	3	2	5	1	0	0
1	3	3	2	3	1	1	10.5	0
1	1	3	1	2	1	1	0	640
1	3	1	3	2	1	1	0	0
1	1	1	3	2	1	1	0	0
1	3	1	3	2	1	1	0	0
1	3	1	3	2	1	1	0	0
1	3	3	3	2	1	2	0	0
1	3	3	1	2	5	1	250	0
1	1	3	3	2	5	1	0	0
1	3	3	3	2	1	1	0	0
1	1	3	1	3	1	1	50	0
1	1	3	3	3	2	1	5	0
1	3	3	3	2	1	1	0	0
1	3	1	3	2	1	1	0	0
1	2	3	3	2	1	1	0	0
1	2	3	1	2	1	1	200	0
1	3	1	3	2	1	1	0	0
1	3	3	3	2	5	1	0	0
1	2	3	3	2	1	1	0	0
1	1	3	1	2	5	1	200	250
1	2	3	1	2	1	1	80	250
1	3	3	3	2	1	1	0	0
1	1	3	1	2	5	1	0	500
1	3	1	3	2	1	1	0	0
1	3	3	3	2	4	1	0	0
1	3	3	3	2	1	1	0	0
1	2	3	2	2	5	1	100	0
1	2	3	3	2	5	1	0	0
1	1	3	3	2	1	1	0	0
1	2	3	1	2	4	1	1.4	0
1	3	3	3	2	1	1	0	0
1	1	3	1	2	1	1	50	100
1	1	3	3	2	1	1	0	0
1	1	3	2	1	2	1	7	1200
1	3	3	1	3	1	1	125	250
1	3	3	3	2	1	1	0	0
1	1	3	1	3	5	1	40	0
1	3	1	3	2	1	1	0	0
1	2	3	2	2	5	1	25	600
1	3	1	3	2	1	1	0	0
1	1	3	1	1	5	1	300	360
1	3	3	3	2	5	2	0	42

## Sheet: note
smoking or not	'1' is 'yes';'2'is 'quit smoking';'3' is 'never smoking'
spouse_smoking	'1' is 'yes';'2'is 'quit smoking';'3' is 'never smoking'
drinking	'1' is 'yes';'2'is 'quit drinking';'3' is 'never drinking'
drinking and smoking in the same time	'1'is 'yes';'2' is 'sometimes';'3'is 'never smoking when smoking'
tea	'1' is 'never drinking tea';'2' is 'drinking tea 1-3 times one month';'3' is 'drinking tea 1-3 time one week';'4' is 'drinking tea 4-5 times one week';'5' is 'drinking tea every day'
coffee	'1' is 'never drinking';'2' is 'sometimes dinking';'3' is 'often drinking'
