# Supplementary material for: Building Up a Robust Risk Mathematical Platform to Predict Colorectal Cancer
Source: Hindawi journal article supplement (doi:10.1155/2017/8917258), 2017-01-01
Supplement: f1 [file 8917258.f1.zip › Supplementary/Supplementary S4.xlsx]

## Sheet: data
class	Grain	Melons	Bean_products	Roots	Fruits	Nuts	Vegetables	Meat	Eggs_and_milk	Seafood	Pickles	Algae	Oils	Seasoning
0	0	0	0	0	0	0	0	0	0	0	0	0	0	0
0	24	5.25714	8.07692	0	41.25	0	28.4119	7.5	3.5	4.5	1.35	1.16667	7	3.15625
0	27.22	13.4286	12.0115	7.24	11.25	3.5	23.6952	5.31	12.84	3	2.525	2.04167	8.66667	8.18333
0	51.7	41.0714	14.3654	19.1	18.6	4	20.1486	5.1	7	0.15	10	0	12.5	3.375
0	32.7	25.2143	15.2462	4.48	63	2.3625	14.7202	17.575	2.8	7.14286	3.6	0.466667	3.25	1.95
0	0	0	0	0	0	0	0	0	0	0	0	0	0	0
0	39.205	11.5057	8.58077	8.43	4.05	3	13.8107	18.75	8.89	0	5.25	5.33333	0	0
0	68.2	30.9286	11.9346	30	63	3	22.2381	16.45	28.05	8.64286	1.925	5.33333	16.8333	4.83333
0	43	26.2143	12.3846	28.6	34.2	1.55	20.6607	1.7	11	0	4.75	0	6.66667	6.13333
0	46.19	40.5714	18.2308	44.4	4.2	0	27.0857	36.75	0.7	3.5	2.025	0.583333	10.4167	9.6875
0	33.3	18.1714	24.4231	16.65	35.625	2.1	14.5952	11.305	9.975	4.5	3.4375	4.29167	12.0833	2.65625
0	34.75	26.3571	14.4231	10	4.2	0	18.3333	32.4	13.045	23.9286	2.3625	4.08333	10	5.16667
0	30	6.69286	15.3769	7.36	31.5	4.5	19.2926	4.5	0.735	1.5	3.5	2.33333	8.33333	4.6875
0	24.85	9.94286	13.7385	14.94	34.5	2.99	16.316	8.01	10	10.1429	9.25	1.75	1.66667	0.65
0	46.05	11.0714	9.36538	4.8	4.2	1.295	20.0869	4.6	4.48	4	0	3.38333	7.0875	4.33125
0	0	0	0	0	0	0	0	0	0	0	0	0	0	0
0	59.325	31.0714	29.7365	32.3	75	8.1125	25.3798	31.6	47.05	25.5	9	24.3167	11.9792	4.01042
0	38.765	10.3286	8.24231	14.18	53.4	3.5875	14.3857	27.25	18	8.28571	3.1625	2.45	8.33333	3.5
0	48.6	37.5714	9.88462	33.6	0	2.7125	17.7869	4.4	1.47	0	0.6125	0	5.83333	1.89583
0	25.6	28.8857	26.6154	6	0	0.35	35.6667	50.5	15	0	3.025	1.75	4	3.53125
0	32.68	25.8643	3.83846	0	31.575	0	17.6171	9	0	5.71429	0.875	0.583333	11.1458	2.86458
0	26.4	6.42857	0.484615	7.08	0	0	3.41905	5.7	32	0	0	0	8.5	4.875
0	30.98	10.5714	6.99615	4.8	13.41	1.575	15.3786	21.5	10.7	5.5	0.525	1.16667	11.9583	2.84375
0	36.4	11.9714	19.2115	8.99	7.35	7.0625	12.6036	36.425	16.025	25.9286	4.2	2.91667	10.5	7.375
0	30.8	26.4286	24.4712	37	30	5.5	14.9976	10.625	27	4.5	2.5	1.80833	9.7125	1.61875
0	31.6	23.2143	18.2596	37	30	2.3625	15.675	14.05	0	7.5	5	1.575	6.125	1.575
0	30.8	11.95	9.06923	1.61	27	0	20.231	11.75	10.49	6	0.7	1.225	38.125	4.27083
0	19.6	9	6.36538	6.4	9	1.1025	22.4048	5.6	28.1	1	1	1.225	13.25	2.71875
0	53.3	26.2857	9.49615	29.8	30	0	14.6643	15.4	3.5	7.5	5	0	13.3333	9.375
0	33.5	9.04286	12.1404	11.34	19.575	0	16.9458	5.29	15	1.5	1.7	0.816667	19.2292	6.44583
0	24.8	24.2714	12.4683	19.01	17.25	0	19.7798	9.9	25.925	1.5	1.05	0.408333	18	7.55
0	40.2	26	14.3317	26.8	30	2.3625	15.7655	7.245	5.6	7.5	4	0	12.9167	3.4375
0	39.2	26.4286	10.5154	37	0	0	15.2981	3.01	1.4	0	5	0	3.75	1
0	28.6	26.4286	18.0385	37	30	0	16.519	5.1	29.59	3	0	1.45833	24.0625	5.72917
0	24	12.25	6.65962	7.26	0	0	19.5119	4.4	5	1	1.3625	1.16667	16.2188	4.59375
0	25.65	6.14286	18.6288	0	7.35	2	23.9781	4.55	2.1	2.5	7.5	3.33333	29.4375	6.075
0	11.6	4.35214	5.94231	5.85	18	1.75	8.81143	4.19	38.49	11.4286	0	2.83333	6.25	2.23125
0	64	8.89286	8.76923	12.5	46.05	3.05	7.66667	11.25	10.2	3.85714	6.75	6.16667	4.4	2.13125
0	34.77	13.6429	9.68846	10.9	33.15	5.4	8.05238	13.75	9.25	1.5	0	5.66667	9.20833	2.23125
0	34.7	11.0714	6.475	10.9	27.75	4.5	9.54881	12.78	8.9	12.8571	2.5	2.91667	10.9083	3.50625
0	46.47	4.73571	7.03077	12.48	18	3.15	8.07833	4	16.98	5	3	2.91667	8.75	2.5
0	0	0	0	0	0	0	0	0	0	0	0	0	0	0
0	26.765	10.1786	4.12115	2.4	9.45	3.675	7.03238	11.25	34.35	2.5	2.7125	8.66667	11.7833	5.65833
0	38.45	15.2143	20.1788	24.275	35.76	6.3125	23.7702	13.05	11.7	4.85714	16.3125	1.525	4.66667	2.47917
0	37.925	13.4286	8.77115	16.9	0	5.3125	11.8179	23.425	9.625	19.2857	2.35	3.15	5	3.125
0	21.78	3.97857	2.42308	15.7	39	0	24.6548	6.375	32	2.71429	1.25	2.33333	10	4.425
0	19	5.70714	4.975	8.5	6	6.6625	18.0071	2.185	11.35	8.57143	0	4	12.7083	4.625
0	0	0	0	0	0	0	0	0	0	0	0	0	0	0
0	47.4	16.5	16.6923	29.84	0	0	14.6429	16.55	5.85	1.5	12.5	2.33333	4.8125	5.6375
0	46.05	29.1429	6.07692	9.6	8.25	0	12.7143	6	2.4	0	13.125	0	6.25	1.90104
0	31.6	5.17143	9.03846	4.4	13.05	0.945	11.0145	8.5	30.51	14.9286	0.2625	7.25	16.8333	5.08333
0	31.85	5.71429	14.5288	4.6	8.1	0.28	15.8095	10.72	19.075	5.5	1.875	6.83333	34.0583	8.93333
0	42.7	8.42857	9.125	16.82	9	1.2	16.8476	11.6	10.6	16.4286	0	11.6667	23.65	3.78125
0	36.64	9.35714	16.4692	9.4	27.15	2	22.7619	20.6	4.65	4	0.35	5.16667	20.625	4.51
0	70.98	16.8571	11.1923	14.2	13.5	8.2	9.11667	6.05	18.55	0	0.875	3.16667	10	2.96875
0	31.9	7.67857	16.0385	8.78	0	2	12.5726	0.4	25.25	4.5	5.125	8.08333	18.3333	3
0	42.2	6.5	9.875	4	18.6	3	12.8143	7.38	4.8	1	1.0125	3.33333	28.7542	7.25833
0	23.7	11.8571	11.1923	27	2.3625	2.2625	19.5952	8.95	4.05	4	1.0125	5.58333	15.125	5.3625
0	45.5	7.71429	11.3462	17.4	0	0.8	17.7929	4.48	0	3.5	0	2.25	4.25	0.95625
0	60	25.9857	13.7692	37.25	22.2	1.925	19.6262	6.89	1.4	2.5	1.75	0	11.25	7.6475
0	27.24	10.9857	12.0519	25.41	40.5	3.75	15.1	3.95	4.95	2.5	1.05	3.325	11.625	2.625
0	37.8	26	12.8846	37	12	6.75	15.0685	7.25	20	7.5	0	0.583333	5.66667	1.79167
0	47.9	26	10.8846	37	30	1.575	16.7976	11.45	22.45	7.5	5	2.04167	0.458333	2.40625
0	31.4	15.1143	8.42308	5.91	21.3	0	24.4113	5.51	4.25	3	1.05	0	13.5	4.375
0	40.8	17.9	1.04038	10	22.5	0	19.7514	4.41	31.75	10.0714	1.05	0.816667	12.5	1.8125
0	24.8	26.4286	14.6538	37	30	2.205	17.119	13.3	12.59	4.5	4	2.15833	8.85417	2.34375
0	27.6	26.4286	22.0192	34	30	6.75	14.3429	17.1	31.41	10	3	1.575	8.75	2.04167
0	42.8	11.0071	6.49269	19.6	11.25	0	24.3399	8.27	5.23	1.5	0.875	2.04167	12.825	4.95
0	24.2	26	16.375	37	30	4.5	16.0071	12.3	30.5	2.5	1.75	2.04167	10.75	2.3125
0	33.5	26.4286	9.57308	37	4.05	0	15.3	12.3	1.4	1.5	4.5	0	8.75	3.64583
0	47.65	26.4286	8.84615	37	15	0	12.381	7.6	0	0	5	0	3.33333	0.791667
0	41.68	23.8571	18.6346	5.39	30	0.7	16.4048	8.1	29.8	12.8571	3.75	1.80833	13.5625	2.03125
0	45	5.14286	15.9154	0.35	60.75	0	16.1667	10	7.5	1.5	6.25	0	3.125	2.08333
0	45	17.5	6.03846	18.9	4.65	0	14.0595	3.78	1.5	1.5	2.5	0	10	2.58333
0	50.7	20.8571	8.46154	19.7	69.75	1.4	20.0238	24.8	5.15	2.5	11.3125	9.29167	21.25	11.375
0	38	22.1429	13.2692	27.59	4.2	0	9.65476	7.75	1.5	2	4.375	0	6.25	2.08333
0	80.4	25.7143	6.92308	58	75	0	20.8095	16	10	5	30	0	8.33333	5.10417
0	0	0	0	0	0	0	0	0	0	0	0	0	0	0
0	45	19.2857	14.1538	12.79	47.1	0.7	26.8714	4.55	32.4	18.5714	1.3125	12.25	7.6875	2.53125
0	0	0	0	0	0	0	0	0	0	0	0	0	0	0
0	46.9	11.2143	7.30962	13.9	0	2.8875	4.62381	21.15	2.9	3.5	5	1.16667	12.375	9.04063
0	19	17.6071	9.09038	9.44	19.125	2	14.8333	14.66	10.37	1	2.5	1.66667	25.875	6.3125
0	71.8	34.5	17.2769	17.45	7.5	0	16.981	20.3	6	2.2	0	11.0417	22.75	7.1875
0	39.5	28.9286	16.8077	14.92	9.51	6.25	12.625	11.65	11	4.42857	6.25	2.19167	11.6667	3.05417
0	42	30.0714	7.22308	24.08	30.6	0	18.4571	3.6	7.5	1.5	0.875	2.21667	14.375	7.08333
0	22	12.0286	12.3462	8	59.25	0	6.94286	5.7	25	0.75	0	1.66667	7.29167	2.23958
0	31.7	20.2857	4.03846	16	31.05	1.25	17.2869	6.3	26.3	8.71429	3.75	7.33333	10.4167	3.07292
0	40.35	10.1036	24.0769	12.1	36.9	3.75	14.4393	7.8	1.4	4	1.5	0.583333	16.6375	9.28125
0	35	30.7143	10.6154	38.56	30	1.5	27.2762	16.85	8.5	16.2857	4.5125	19.75	12.5	4.6875
0	31.5	4.28571	7.88462	1.84	28.8	0.28	15.3619	5.5	8.55	2	1.625	2.25	8.25	1.77375
0	28.5	16.1786	8.13462	20.84	24.45	2.2	19.1643	3.93	7	7.28571	4	4.5	13.4167	2.66667
0	29.3	27.2	16.9308	32.12	10.2	19.5	13.6786	4	20.445	2.3	7.5	2.93333	4.5	2.0625
0	56	27.7143	25.1154	26.2	4.3575	0	17.9429	16.45	4	14.8571	25	2.33333	13.125	0.75
0	62	7.57143	60.3846	58	22.95	0.7	30.1714	36.3	12.3	0	2.5	1.75	13.3333	6
0	48.75	12.8571	4.84615	11.07	3.15	0	8.81	3.26	0	1	1.4875	0.583333	10	3.1875
0	0	0	0	0	0	0	0	0	0	0	0	0	0	0
0	27.05	6.99286	6.01538	4.59	8.91	2	7.37619	13.38	6.04	6.28571	6.225	3.41667	5	3
0	32	15.1714	8.73077	11.8	69	4.5	9.73333	13.225	35.5	8.57143	4.5	6.16667	16.5	9.075
0	39	9.13143	5.94231	4.84	6.15	0	6.16548	0.5	5.525	0	3	1.725	5.5	3.23125
0	24.85	13.6314	20.4385	7.7	69	6.25	8.34524	3.625	2.9	1.5	1.5	1.63333	11	3.75375
0	50	32.5714	7.34615	14	19.575	2	13.244	2.6	2.5	0	13.75	0	6.875	3.09375
0	35	16.2286	14.1356	15.63	9	0	13.631	3.21	2.5	1.5	15	1.66667	9.375	4.0625
0	34	37.2143	9.75	30	10.26	2.875	9.6619	7.5	2.75	1.5	6.25	0	11.25	3.875
0	40.84	14.6	6.86538	8.4	13.5	0	2.68714	20.45	18.1	1.7	7	4.15	10.2083	3.42708
0	49.8	10.4643	9.24615	23.86	14.76	1.575	8.15952	5.1	1.82	1.5	5.875	1.16667	17.5	4.25
0	0	0	0	0	0	0	0	0	0	0	0	0	0	0
0	0	0	0	0	0	0	0	0	0	0	0	0	0	0
0	0	0	0	0	0	0	0	0	0	0	0	0	0	0
0	52	2.47857	9.54808	1.68	6	0	19.2743	6.9	1.05	1	0.525	3.91667	20.4167	4.08333
0	47	8.61429	6.99038	10.5	14.4	0.28	17.4905	2.4	4.275	0	0	0	18.75	6.30208
0	29.6	23.5714	18.25	2.1	13.5	1.21	23.9095	9.05	3.15	3	5	8.08333	8.33333	1.35417
0	38.34	17	13.625	25.62	9	1.295	36.7619	14.75	8.05	11.6429	0	2.91667	12.5	3.69792
0	35.65	18.9571	10.7308	37.6	3.15	2.75	22.3571	15	6.8	12.0714	2.625	42	8.75	2.4375
0	20.25	22.4286	16.6346	16.34	17.25	0.2625	17.8769	13.44	9.4	6.28571	1.2625	7.91667	4.2	2.46667
0	53.2	17.8571	7.02308	6.4	35.325	18.925	6.50476	9.43	30.34	2	2.625	5.16667	7.5	3.51875
0	0	0	0	0	0	0	0	0	0	0	0	0	0	0
0	30.2	4.05	15.8673	7.4	28.05	0.5425	14.2586	5.02	8.59	2.5	2.4	2.83333	9	5.625
0	21.8	2.90714	17.7692	5.6	15.6	0	17.0424	3.82	2.99	12.8571	5.75	2.91667	8.5	1.95
0	25.35	3.03929	20.5038	13.26	7.65	2.28	19.1205	10.65	26.19	2.85714	2.0125	7.83333	8.75	5.6875
0	41.4	1.90357	10.5923	16	55.05	0.875	21.5381	7.82	5.49	7.14286	5.75	11.75	10.2083	4.52083
0	25.3	4.56429	17.05	2.26	15.6	2.525	21.975	2.37	20.115	1.58571	6.5	5.33333	6.5625	2
0	37.2	2.32143	19.3192	24.6	0	1.25	21.7036	8.95	5.2	22.6786	5.875	2.83333	18.375	11.375
0	22	4.55714	4.78077	13.54	0	0.35	18.8293	4.6	1.89	3	6.875	3.91667	14.125	4.78125
0	53.8	11.6143	7.66923	23.44	3.6	0	25.4217	0.9	1.49	3	21.625	2.25	15.5	5.25
0	30	11.6429	15.0923	21.26	40.5	3.3	22.8943	6	3.64	5	4.375	5	15.0208	3.57292
0	23.95	7.76429	15.7654	23.86	5.46	1.4	20.7612	6.9	3.325	0.5	5.75	6.25	10.3542	4.88542
0	27	6.36429	12.6346	1.26	20.25	1.4	21.8524	6.675	34.05	1.42857	1.875	10.2333	12.75	3.25
0	52.92	11.9286	4.40385	9.45	34.5	7.5	6.86905	26.85	8.55	3	15	3.33333	12.375	9.4875
0	51.55	6.24	13.2173	10.64	20.25	6.425	30.5798	13.25	9.45	3	13.75	6.83333	17.9167	7.8125
0	38.8	8.38714	15.8885	18.3	20.8125	7.3125	22.0895	1.32	8.9	2	4.3875	1.28333	21	5.575
0	44.42	9.67857	11.2654	10.2	26.4	4.025	9.3381	14.75	23.2	7.21429	1.3125	0	13.75	2.6125
0	16.4	10.9429	22.9231	26	39.075	0	22.6352	10.14	34.9	0	21.875	15.8333	16	4.5
0	31.96	12.5	6.81731	9.5	54.9	0	8.69048	18.35	7.05	8.57143	7.5	1.16667	10.15	2.25
0	47.4	8.72857	11.5577	23.4	39.6	8.875	27.5479	10.95	22.69	21.2857	13.375	7.91667	11.25	5.41667
0	0	0	0	0	0	0	0	0	0	0	0	0	0	0
0	55.5	6.52857	21.1115	12.34	15.6	3.1375	15.8017	8.225	18.64	2.6	6.375	2.275	15	7.64583
0	31.8	9.5	18.1423	11.3	27	0.8	15.5483	7.48	16.19	6.78571	3.925	5.375	7.08333	7.07292
0	38.42	9.46429	5.13077	12.8	21	0	6.5	2.33	5.55	3.5	0	8.41667	8.75	4.13333
0	28	5.02143	10.1885	4.86	12.6	2.5	25.6443	4.77	31.7	4.85714	15	5.16667	8.08333	4.20833
0	40	0	4.5	21.94	46.05	0	19.0405	4.65	1.19	0	6.5	1.16667	4.33333	5.68333
0	29.95	25.5	8.26923	7.2	0	0.6	20.0664	8.85	22	17.7857	4.5	5.66667	13.3333	2.28333
0	41.09	24.7857	21.4327	8.26	37.575	0.42	25.831	5.8	3.55	6	5	7.33333	10.8333	6.41667
0	30.8	13.1786	19.6538	12.54	0	14	22.8643	6.97	24.455	5	11.5	4	8.33333	2.16667
0	22.2	6.58571	12.1538	29.2	25.65	2.92	24.2429	5.3	2.17	5	0	1.16667	3.64583	1.84375
0	25	27.6429	29.0673	13.31	13.5	8	26.6107	4.45	3.1	15.2786	9	4.5	6.77083	2.08333
0	30.8	12	8.24615	2.94	11.1	3.3	27.1083	6.63	20.55	7.64286	3.7625	6.66667	6.875	4.8125
0	42.114	15.3286	9.66923	9.66	21	1.78	16.0702	4.65	4.23	5.53571	2.35	0.583333	7.58333	2.35417
0	25	9.72857	14.6731	18.1	12.15	1.25	13.044	1.46	2.7	4	2.2625	2.33333	4.98333	2.82708
0	53.3	6.43571	9.90385	7.44	27.75	3.5	23.2988	6.35	22.8	9.28571	0	4.5	10.25	4.09375
0	48.9	26.2143	31.8365	20.86	48.9	0.49	31.5571	7.25	28.905	1	2.875	2.91667	9.58333	2.44375
0	36.854	6.16857	18.4615	16.84	12.15	3.1	17.4798	5.75	4.445	9.34286	2.525	2.33333	8.95833	4.63542
0	43.8	24.7857	19.2788	16.86	18	0.28	23.1411	3.76	5.525	2	6.5	1.75	8.75	3.1875
0	0	0	0	0	0	0	0	0	0	0	0	0	0	0
0	47.2	4.55714	5.20769	12	5.46	2.205	18.171	3.4	1.75	0	4	0	12	3.525
0	46.05	13	11.3769	10.47	0	0.7	14.5857	14.1	6	2.5	15	1.75	30	4.75
0	37.05	11.9857	9.49423	14	23.25	1.4	15.55	11.7	24.8	14.2857	1.25	4.33333	6.25	2.29167
0	49	12.4286	13.8077	36.52	18.735	3.2875	16.5048	13.35	14.525	5	28.75	6.54167	8.58333	1.75
0	41.3	7.14286	14.4327	10.36	19.575	3.925	14.1702	3.65	5	1.5	4.5	2.04167	10.1667	3.5
0	29.8	13.5429	21.5096	16.24	19.05	3.425	18.8974	6.74	30	1.5	6.875	7.33333	6.25	4.47917
0	47.2	3.64286	10.1788	7.775	15.6	0.8	14.4595	3.2	3.94	3	4	1.75	20	7.21667
0	34.84	7.5	18.2615	10.715	36.9	1.905	14.6074	3.12	20.09	3	4.25	5.08333	10.5	5.4375
0	30.7	6.42143	7.34615	16.4	4.5	0	10.7071	10.98	8.025	4	13.75	1.75	8.33333	2.58333
0	36.55	5.22857	23.5192	5.32	36.9	3.9	15.8217	2.7	31.54	11.4286	2.625	4.38333	6	5.84167
0	21.05	5.58571	10.1308	6.82	19.575	1.6375	17.4819	3.6	34.165	8.57143	2.625	7.91667	3.875	1.625
0	16.15	25.25	12.1923	9.5	0	0	14.369	1.8	2.1	3	1.05	0	20.8333	4.375
0	51.2	30.2857	17.8462	21.68	9	0	26.7976	5.74	3.5	0	0	0	12.375	1.8975
0	26.98	8.04286	10.7923	16.55	0	1.4	18.2448	7.31	18.25	8.5	2.125	1.63333	18.8333	4.33333
0	29.1	4.4	7.49808	10.78	17.325	0	17.4281	7.56	2.8	7.71429	3	1.225	12.9375	2.875
0	24.8	21.8571	18.6673	11.24	16.05	1.75	19.635	7.105	28.19	3.5	2.2625	1.80833	15.1667	2.36667
0	33.6	26.2857	13.9577	14.8	12	4.5	16.7262	17.55	14.675	4.5	1.75	1.80833	5.9125	2.75
0	15.525	21.2143	9.75	10.2	28.125	2.85	14.9021	5.52	32.35	1	2.75	0.583333	13.125	5.61458
0	43.5	26.4286	10.6058	14.8	4.2	2.205	16.6298	17.95	4.2	4.5	6	2.15833	11.9792	2.34792
0	57	13.7286	17.3885	17.9	3	0	22.5017	6.4	33.4	3.5	2.25	0.583333	14.8958	5.04167
0	40.8	25.2857	8.8	13.5	0	0	14.3238	12.25	7.7	0	5	1.4	7.1875	1.03125
0	50.5	19	19.3115	16.4	5.2875	0	22.696	2.3	1	0.7	1.175	1.16667	8.33333	4.14583
0	45.7	5.77143	9.76923	13.6	0	2	17.044	3.7	3.5	2	0	0	6.25	1.61458
0	28.2	11.5714	5.78846	11.87	10.275	3.325	8.38333	13.95	5.95	4	5	3.08333	9.16667	2.75
0	12.42	18.2714	8	1.08	6.075	4	11.1119	7.25	38.8	0	2.5	3.25	10.75	3.25
0	31.2	6.69286	3.94615	2.18	24.8625	0.025	8.29286	8.75	2.795	1.5	3.75	0.5	8.33333	6.77083
0	0	0	0	0	0	0	0	0	0	0	0	0	0	0
0	35.13	5.19286	13.55	10.64	27.105	1.4	10.3786	12.01	10.73	6	1.3125	6.25	16.875	5.2875
0	40	7.61429	4.33654	6.94	22.2	3.4	4.03333	7.78	9.7	0	12.5	1.16667	4.16667	3.57708
0	28.75	4.72857	16.4192	8.13	11.1	2.5	11.8093	7.96	4.9	3.5	1.3125	5.66667	7.39583	4.79167
0	46	9.85714	9.02692	20.95	46.575	30.225	14.5643	11.25	6.18	7.64286	1.575	2.33333	12.5	2.60417
0	36.2	16.5286	7.14423	11.6	23.4	16.575	12	7.55	4.29	0	6.75	1.28333	18.3333	4.70833
0	37.7	23.9286	11.6058	9.08	4.5	0.7	11.5417	18.95	6.3	0	9.75	2	25	4.375
0	37	9.19286	5.56538	9.34	25.125	14.5	6.8119	10.03	33.325	9.07143	9	3.5	13.5	2.45833
0	45	8.5	11.7038	13.2	18	1.4	21.919	3.69	9.08	23.5	3.5	0.583333	12.5	4.65
0	36.9	26	17.6538	34	12	6.3	15.7738	8.25	16.3	8	0	1.45833	12.875	2.1875
0	35.6	23.8571	18.0385	37	12	3	15.5155	7.25	4.9	3	1.05	2.04167	3.33333	1.79167
0	45	23.7143	9.58654	30	4.725	0	21.3333	3.14	5.09	1.5	3.75	0	16.6667	5.52083
0	28	26	11.0577	37	12	4.5	15.3643	10.175	33.1	3.25	5	2.33333	11.475	2.0625
0	41.2	26	13.1394	37	4.2	3	15.7381	11.85	20	7.5	4	0	12.5	2.1875
0	52.2	8.88571	17.0115	47.9	21.3	0	20.7762	8.5	23.9	2	1.95	1.34167	18	4.0625
0	31.54	12.2429	8.71538	16.56	28.5	0.49	17.8995	1.9	2.75	0	2.5	1.4	14.5833	7.64583
0	47.1	11.4643	9.89615	11.5	27	1.4	19.9667	4.196	1	5	1.35	0	12.5	1.97917
0	52.6	17.5714	13.2558	9.52	0	0	23.9381	21.01	1.89	3	1.7	0	17.5	2.85833
0	28.7	25.7143	16.0817	37	48	0	17.3815	11.29	22.7	7.28571	2.5	1.63333	8.75	3.22917
0	43	14.5	17.0096	8.06	20.1	0	21.2631	5.885	6.05	4.5	3.4625	1.75	12.375	3.24562
0	0	0	0	0	0	0	0	0	0	0	0	0	0	0
0	45.6	25	16.6933	34	12	0	22.1452	22.1	2.8	7.5	7	0	32.5208	3.35417
0	50	26	8.50962	29.8	10.65	2.205	21.281	21	1.47	4.5	7	0	7.5	2.65625
0	46.7	26.4286	17.8029	14.8	4.2	6.75	16.7738	21.65	9.1	10.5	5.5	2.04167	14.1625	2.40625
0	20.53	5.66429	6.12885	7.94	13.5	0	11.9171	7.61	24.55	5.5	1.35	4.08333	12.0167	2.12917
0	0	0	0	0	0	0	0	0	0	0	0	0	0	0
0	18.325	11.9286	13.6923	16.44	4.2	1.4	17.6702	3.605	25.54	2	1.9375	2.04167	32.2917	2.76042
0	34.5	17.8571	34.9663	26.8	12	2.3625	16.4452	12.525	26.58	7.5	4.5	2.68333	25.4375	5.72917
0	39.5	26	13.5385	29.8	21	3.15	15.8524	10.1	6.09	4.5	5	0	10.0375	2.6125
0	25	6.00714	9.42308	7.8	16.5	0	16.8412	12.725	5.5	2	1.9375	1.225	25	4.4625
0	43.6	26.4286	13.9808	14.8	30	4.5	16.0881	14.55	29.73	21.4286	4	1.925	6.00833	0.875
0	51.2	26.2857	14.3269	13.5	12	1.575	16.9929	15.4	4.98	4.5	3	1.45833	23.6042	3.4375
0	36.5	26.4286	13.9038	14.8	3	2.8	15.5298	18.4	4.27	6	5	0.408333	10.9375	3.07292
0	0	0	0	0	0	0	0	0	0	0	0	0	0	0
0	51.45	3.94286	8.63846	17.55	61.5	0	22.1481	18.85	5.4	12.4286	7.5	2.33333	29.1667	8.225
0	25.68	26.4286	11.6731	34	12	1.575	14.1143	13.2	2.45	15	2.1	1.98333	6.4625	2.0625
0	32.8	26	17.6442	37	12	4.5	15.3048	13.4	4.9	5	5.5	1.225	15.4	2.13125
0	31.5	26	9.43269	37	12	1.05	16.1571	10.5	2.45	2	6.5	0	16.1208	1.65625
0	25.18	10.15	14.7731	11.7	33.75	0	27.3686	6.75	8.43	1.5	3	1.75	14.6875	3.91667
0	43.6	26.4286	16.9375	32.7	12	1.05	15.9714	29.9	11.675	7.5	6.5	0.583333	8.85417	1.82292
0	27.2	24.2857	22.1577	10.9	12	1.575	13.8595	10.55	24.9	47.8571	5.25	2.39167	19.125	2.375
0	35.2	11.5029	23.9731	15.6	33.75	0	23.0114	10.185	39.75	9.14286	5.35	11.75	12.875	7.625
0	48.8	42.8571	7.83077	48.7	0	0	18.9857	7.6	1.4	3.5	1.925	0	10.5	2.26042
0	48.8	38.9286	7.5	55.5	0	0	16.2405	14	0	0	9	0	4.375	3.13542
0	48.6	39.6429	5.19231	40.5	0	0	17.4476	9	1.4	0	8.5	0	5.20833	0.885417
0	35.8	26	11.7692	26.8	30	0	15.0274	13.955	25.6	21.4286	1.75	2.04167	18.9583	4.0625
0	52.598	26	9.5	13.5	4.2	0	14.9631	15.325	0.49	7.5	6	0.583333	13.125	6.04167
0	32	19.5714	9.48173	17.8	12	0	16.1976	17.425	3.5	4.5	5	0	9	2
0	30	4.14857	9.58846	23	6	0	21.009	14.57	3.9	5.71429	5	8.075	13.75	5.99375
0	25.8	25.7143	9.47115	26.8	0	0	15.3833	14.15	1.4	2.5	0.7	0	10.6875	1.6875
0	47.2	26	9.49231	37.2	22.5	2.3625	22.1119	21	0	15	6.5	0	17.7083	7.39583
0	32.8	25.7143	8.03846	13.325	3	1.575	14.869	9.55	0	21.4286	5	0	11.6667	1.45833
0	0	0	0	0	0	0	0	0	0	0	0	0	0	0
0	65.8	6.05286	10.3888	24.84	5.1	0	20.9583	2	2.5	0	3	0	8.75	3.70417
0	63.2	10.0286	16.0673	11.1	21.15	2	18.229	2.1	3.8	14.2857	3.1	1.4	20.8333	2.96875
0	40.28	10.0571	5.18462	55	20.25	3.5	17.284	5.46	31.4	7.14286	3.275	2.33333	11.375	4.46875
0	31.5	25.7143	15.8365	32.8	48	4.5	17.9524	14.525	29.1	9	6	2.04167	8.01667	2.22083
0	59.82	8.86429	12.6	11.75	33.75	0	23.5114	4.95	15.58	3	1.975	1.75	9.66667	6.89167
0	26.35	9.07143	9.25385	18.7	7.2	0	20.5786	5.295	7.45	4.28571	0.6	2.33333	14.5833	4.27083
0	47	12.9857	16.4731	20.88	29.25	0	22.2143	7.58	6.23	5.71429	0.6125	2.91667	20.25	3.125
0	0	0	0	0	0	0	0	0	0	0	0	0	0	0
0	42.8	39.6429	11.8077	21	16.5	1.05	19.4	3.9	0	0	4.75	0.816667	8.33333	3.02083
0	42.8	27.1429	22.2481	26.8	10.65	18	15.3476	25.2	27.05	12.1429	6.5	2.21667	16.6667	5.83333
0	0	0	0	0	0	0	0	0	0	0	0	0	0	0
0	51	6.85714	9.84615	19.86	0	0	17.5602	9	0.49	2	1.05	2.33333	1.60417	4.15625
0	39.2	5.41714	12.5654	11.21	33.75	0	17.6948	5.81	3.5	5	3	2.33333	9	3.375
0	20.6	18.6429	18.4615	27.2	51	0	20.0068	4.3	5.6	1	3.35	5.25	17.7083	1.61458
0	42.2	26	22.0769	14.8	30	0	18.5667	10.35	27	3	6.5	1.575	7.29167	3.86458
0	57.3	38.9286	15.7125	20.2	4.2	0	19.1571	27.3	7	4.5	8.5	2.68333	23.125	1.61458
0	28.7	26.4286	7.38462	5.5	8.1	0.875	13.581	21.45	2.45	4.5	1.75	0.583333	16.5	3.09375
0	24.1	23.4286	7.16346	9.6	12	3	16.156	11.105	10.88	29.5714	1.6625	1.98333	19.7917	5.20833
0	0	0	0	0	0	0	0	0	0	0	0	0	0	0
0	24	26	10.0192	7.2	6.6	4	24.7786	14.3	5.215	15.6429	3.6	6.75	29.1667	11.0417
0	68.2	33.7857	12.75	35.14	18.15	2.275	23.2321	11.65	8.1	21.4286	3.9375	3.70833	21.25	8.625
0	16	1.65	5.09231	3.71	3.78	0	8.83571	2.85	3.5	0	0	0.816667	8.33333	3.06667
0	37.33	23.1429	10.9865	10.84	6.15	4.875	18.8762	20.55	21.3	1.5	2.775	3.03333	8.33333	1.875
0	31.45	12.3214	16.7462	20.79	23.4	3.445	15.9638	8.1	7.4	6.71429	6.625	3.5	5.625	2.73937
0	55.2	5.64286	15.9423	16.2	37.05	1.4	16.4457	32.765	15.99	3.5	4.5	4.66667	12.375	8.83125
0	42.375	10.9643	21.2769	12.84	17.55	9	22.5193	13.196	23.56	5	2.5	3.5	10.5	5.95
0	0	0	0	0	0	0	0	0	0	0	0	0	0	0
0	30	9.88571	10.8702	13.3	0	1.75	20.8762	18.1	3.39	1	13.2875	0	4.41667	1.70833
0	34.025	26.4286	10.1923	8.15	0	0	15.5964	14	0.49	7.5	3.5	0	4.25	1.35
0	40.8	25.7143	13.6942	14.8	12	0	15.1548	23.6	2.8	0	0.7875	0.466667	11.9167	3.89583
0	25.95	25.7143	16.0577	14.8	12	2	15.6786	14.35	26.15	8	4	1.45833	14.1625	4.4
0	27.5	26	11.4087	12.2	12	0	15.0095	14.515	0.49	4.5	0.7	1.69167	12.5	3.25
0	38.6	23.5714	14.674	14.8	12	1.925	16.9833	25.6	9.1	0	2.275	0.408333	7.29167	1.77083
0	48.7	24.2857	12.2942	14.8	12	0	15.9988	22.35	17.105	15.75	2.45	2.50833	12.5	3.16667
0	49.6	25.7143	4.96923	7.425	0	0	14.2079	9.05	12.59	4.5	0	0	12.5	1.25
0	54.1	26.4286	4.37692	29.8	4.2	0	14.1114	4.02	3.5	0	4.5	0	6	1.79167
0	57.4	3.04286	12.5231	22.54	11.25	0	14.7095	4.55	6	12.8571	0.35	0.816667	14.25	3.91667
0	27.8	26	10.5	29.8	30	0	16.3738	20.9	7.7	7.5	5	2.04167	13.5417	3.95833
0	45.3	34.3429	4.67308	24.2	8.1	1.575	17.2976	14.5	25.7	1.5	0	0.35	4.125	1.30625
0	35.19	30.8857	24.4423	22	69	0	19.9762	20.06	29	5.71429	10	7.4	13.75	6.80625
0	35	5.53143	7.94231	20	27.675	0	16.1905	5	0	4	1.4	0	4.125	3.91875
0	44.05	3	8.11538	54	45.825	3.2	28.5048	33	8	1.5	0	0	8.25	6.01562
0	20.7	59.5714	7.53846	30.4	33.75	2.5	8.45238	17	7.2	1.5	0	8.33333	12.5	12.7083
0	33	76.4286	13.8462	25	3.6	1.2	11.0048	13	11.75	2	6.25	0	11.1667	4.60625
0	64	14.7714	11.5385	24.4	0	0	7.5	21.5	2.5	0	0	0	7.29167	2.08333
0	44	22.6286	4.01923	0	0	0.42	4.51667	11.465	0	2	0	3.33333	5	2.29167
0	25	10.1429	10.6394	8.8	30	0.875	13.6548	20.6	13.9	0	0	0.933333	16.6667	6.04167
0	45.05	15.1429	16.4904	30.18	24.57	9.725	14.6643	10.755	8.505	4.60714	2.5625	2.89167	4.75	3.1875
0	78.2	33.5714	15.6538	19.8	14.25	0	20.2714	16.92	4.65	7.14286	12.475	0.583333	11.6667	4.70833
0	41.8	9.25	10.5192	5.02	36.9	0.42	12.9786	11.65	17.05	4.5	3.25	0.583333	17.1875	10.8625
0	32.4	19.4429	18.1654	5.88	15	1.95	9.93095	27.3	0.7	0	0	5.83333	8.33333	2.58333
0	18.145	24.7571	17.6808	11.19	12.825	3.8125	11.2714	4.015	13.805	2.85714	4.6875	9.66667	13.125	5.5625
0	28.5	3.14286	17.3269	21	30	1	14.369	7.345	5.5	5	1.75	1.75	7.5625	3.78125
0	30	5.42857	7.5	5.2	48.9	0	11.9524	2.15	1.75	4.5	4.275	0.583333	6.875	3.60938
0	25.96	10.7143	7.71635	12.88	35.55	5.375	14.5536	5.9	12.1	0	3.75	0.875	12.1667	4.66667
0	33.15	23.9	13.3154	13.528	7.95	4	13.4405	19.34	21.04	8.78571	0	0	6.45833	3.33333
0	26.35	6.64286	10.8231	13.26	16.5	3	12.1667	3.6	0.525	2	3.975	0.583333	16.775	2.54375
0	12.2	6.28571	7.54808	2.26	19.875	0	16.1274	3	25.6	4.28571	1.7625	2.83333	6.875	2.55208
0	34	1.78571	6.24038	21.84	78.75	0.96	17.9905	12.35	20.3	14	3.125	1.75	11.7708	4.89583
0	59.9	16.2143	7.25385	16.8	2.625	0	21.0095	14.05	5	2.85714	2.5	0	12.5	7.91667
0	47.5	46.7857	27.4615	15.888	33	14	20.5119	36.35	11.13	21.4286	0	3.25	16.6667	3.66667
0	45	9.64286	2.73077	36.9	14.4	0	10.119	2.7	5	1.5	0	0	18.75	4.79167
0	57	17.0286	27.8846	51.7	46.05	9.5	10.7048	16.925	13.9	4.28571	3.375	1.975	31.6667	10.1042
0	54	17.5	4.51923	19.2	0	0	4	2	0	0	9	0	4.175	1.49604
0	61.71	13.1429	18.0769	38.64	23.235	4.5	21.1429	37.3	11.2	14.2857	6.25	10	21.875	6.97917
0	40.7	29.4286	18.1827	22.2	57.6	6.25	17.3071	9.5	5.78	9.5	7.5	2.33333	17	5.16667
0	0	0	0	0	0	0	0	0	0	0	0	0	0	0
0	40.9	6.46429	14.2308	32	9	0.7	16.8262	11.61	7.45	0	2.5	0.583333	16.6667	2.79167
0	23.55	8.94571	12	9.43	34.5	0	18.0857	7.525	30	5	5	1.50833	5.16667	3.77083
0	32.5	15.5857	10.9615	13.03	10.26	8	16.1333	11.15	7.2	14.2857	7.5	1.925	6.25	2.76042
0	36.7	16.2429	9.57692	3.9	14.25	1.4	9.80714	7.1	6	0	4.25	0.408333	22.5	3.64583
0	33.7	27.8786	18.9875	26.7	12.825	4.9375	14.0833	15.7	5.5	7.5	7	1.10833	9.16667	3.83333
0	61.85	25	7.07692	27	18.75	4	12.8976	5	11.675	0	0	0	6.66667	2.58333
0	44.34	27.0714	23.2462	9.62	2.415	7.75	16.85	4.945	15.98	0.35	12.875	8.575	13.5417	5.66667
0	48.2	9.87143	6.65385	16.672	0	0	10.381	1.96	0.525	0	2.8875	0.583333	5.20833	1.40625
0	32.56	7.63571	3.46154	13.5	1.575	0	6.82381	0.7	0	0	0	0.583333	5.5	0.91575
0	45.7	12.6786	5.93077	12	2.25	0	11.7619	9.3	1.75	0	0.875	0	13.3333	1.45833
0	0	0	0	0	0	0	0	0	0	0	0	0	0	0
0	47.2	8.42857	13.5673	15.05	61.5	3.78	18.5417	6.9	11	9.71429	2.4375	0.583333	21.25	7.70833
0	30.1	19.4143	18.6923	28.08	11.31	3.325	12.8607	8.445	4.765	2.7	16.25	4.54167	5.83333	2.625
0	48.4	35.4571	25.1923	42.08	34.35	7.125	22.3414	31.35	16.725	16	15	20.25	29.1667	9.1875
0	27.65	21.9643	11.8154	13.23	4.2	8	10.5445	13.175	3.975	5.9	18	0	10	8.75
0	30.7	8.35714	16.4808	15.46	36	0.75	18.8868	5.1	13.35	10.2857	4.125	32.8333	12.5	4.375
0	42.4	13.7857	7.26923	2.46	34.5	0.96	11.7554	9.2	31.55	6	1.3625	30.875	22.9167	4.58333
0	38	32.0571	18.5769	11.8	13.35	2.5	19.9762	5.4	0	0	0.875	1.4	5.41667	3.08333
0	40.05	6.85714	17.5769	6.08	32.25	0	15.1333	11.35	30	6	2.5	2.33333	12.5	3.22917
0	42	6.92857	27.0769	22.84	25.5	0	16.1607	2.4	16	4	2.025	1.75	24.8875	7.5625
0	39	4.15714	13.7885	5.8	16.5	0	11.5714	7	3.675	1.5	5.3875	2.33333	10.4167	2.03125
0	64	7.74286	3.75	20	18	0	11.2381	2.48	1	2	0	0	12.375	3.23125
0	47.35	12.4286	15.5385	4.4	0	0	9.90655	8.35	4.25	2.5	0.6125	0	19.2292	4.46875
0	60.8	11.2857	13.4808	17.26	0	0	11.519	7.6	7.05	0	1.5	0	16.75	10.2594
0	0	0	0	0	0	0	0	0	0	0	0	0	0	0
0	0	0	0	0	0	0	0	0	0	0	0	0	0	0
0	46.2	9.7	6.34615	16.66	9	0	10.525	7.45	13.225	4	1.025	0	6.47125	1.80917
0	27.721	9.57143	19.7981	21.1	14.4	4.75	18.5833	1.268	3.71	2	1.5125	2.50833	6.875	2.48125
0	55.04	7	19.7115	10.84	14.55	4.85	17.3417	10.105	15.325	7.3	2.2625	2.33333	8.325	2.9625
0	61.16	16.7857	24.25	19.44	3.6	1	18.45	19.85	13	5.14286	0.525	6	13.3333	3.125
0	0	0	0	0	0	0	0	0	0	0	0	0	0	0
0	34.3	7.5	32.0673	23.6	30	2.9	22.756	3.3	17.84	5	4.5	5.08333	8.33333	6.14583
0	45.499	18.8929	15.1154	26.1	32.55	5.25	25.9274	13.3	11.2	2	11.125	2.33333	19.125	7.25
0	60.35	7.85714	18.8462	7.26	13.5	0	23.7917	4.85	1.4	21.1429	16.6875	10.5833	15	5.75
0	40.85	8.05714	15.2308	19.44	25.8	10.28	28.9202	4.6	29.75	10.2143	4.375	5.75	8.08333	4.1
0	26.5	11.4286	26.7308	6.4	25.5	0.96	19.1495	5.64	11.8	4.5	1.625	4.5	6.97917	2.86458
0	27.5	10.4071	30.8462	7.745	20.25	2.5	21.9036	6.6	3.54	3.17857	3.1375	5.15	8.83333	4.54167
0	26.7	7.5	40.3846	8.44	25.5	0	26.694	6.35	27.24	4.5	4	6.16667	5.4375	1.41875
0	27.2	4.44286	22.6154	10.92	25.8	3.7	23.9393	8.54	32.425	4	11.25	7.5	16.1667	4.59167
0	13.225	3.14286	6.15385	6.7	14.85	0	14.0229	1.75	1.575	0	2.5	6.66667	12.5	5.41667
0	45.7	1.85714	9.97308	6.68	22.5	2	21.2881	3.19	1.575	4	2.375	1.16667	11	4.07917
0	20.75	3.24643	3.46154	8.94	5.2875	0	10.1405	7.9	3.75	2	6.25	3.91667	11.4583	3.02083
0	63.75	4.76429	8	18.94	34.5	0	23.6738	7.7	5.735	17.1429	1.25	5.25	23.9583	3.90625
0	34.89	6.78571	16.5962	18.08	27	1.8375	19.1467	3	12.8	12.8571	5.625	1.75	7.65	4.10833
0	14.925	3.63571	10	5.76	8.7	0	10.1907	2.5	24.275	3.60714	0	3.03333	12.625	6.875
0	14.365	2.25714	4.53846	6.18	27	0	13.743	1.245	28.19	15	0	2.83333	8.75	4.27083
0	39.65	11.3286	6.03846	21.9	17.1	0	8.96	3.745	0.7	0	0.4375	1.75	6.66667	4.45833
0	38.55	13.0714	6.75385	14.26	1.575	0	24.0476	16.65	4.8	2	12.5	1.75	4.2	2.65
0	30.42	14.0714	10.5308	12.8	25.65	1.575	29.1119	20.725	3.815	3	9.125	4.375	9.375	4.9375
0	20.7	6.35714	4.26154	13.9	14.2875	0	14.1405	2.55	4.45	0.15	12.9375	2.33333	6.875	3.625
0	33	8.67143	6.07692	36.6	27.7875	1.75	9.65357	7.55	3.75	3.5	6.375	0.583333	7.5625	2.2
0	27.2	27.8571	22.5	37	9	2	15.831	20.65	8.25	22.9286	5	1.45833	11.25	2.53125
0	35.2	7.45714	13.9962	12.4	20.25	0	20.5869	6.7	9.9	1.5	2	2.33333	8.66667	2.91667
0	46.85	27.1429	12.625	34	18	0	15.5524	8.85	1.4	0	5	0.583333	11.4583	2.29167
0	33.6	25.5357	18.6154	37	30	2.8	17.8762	23.9	32.25	18.8571	7	1.75	6.875	2.375
0	31.9	13.0429	3.07692	6.7	0	0	27.419	0.7	4.48	0	3	0	13.5	2.29167
0	26.9	25.7143	17	13.5	12	0.7	16.4143	12.3	22.94	4.48571	5	1.45833	11.5	2.82708
0	33.5	34.8571	9.65385	6.7	0	0	20.9519	11.05	0.49	0	1	0.583333	43.75	3.96667
0	19	27.8571	20.1538	37	6.15	6.75	14.4429	1.68	34.4	12.8571	1.75	0	13.25	2.125
0	53.5	30.3571	16.9615	32.7	2.1	0.98	20.7524	33.7	4.9	7	1.05	0	11.875	3.75
0	0	0	0	0	0	0	0	0	0	0	0	0	0	0
0	52	11.7286	16.1462	10.86	73.5	0	26.2357	11.05	25.4	37.7143	3.3125	2.275	31.25	9.53125
0	43.14	7.19286	14.8481	13.96	54	0	25.82	4.85	7.28	0	0	2.33333	12.5	2.3375
0	32.8	25.4286	6.15385	14.8	12	0	14.8929	3.4	1.4	0	5.5	0	6.875	1.69813
0	55.5	26.2857	11.6538	14.8	60	0	22.5167	11.45	2.4	0	6.5	1.75	16.1458	2.5
0	55.8	32.5	14.1587	14.8	12	0	19.0714	32	3.5	15	5	0	19.125	1.75
0	62.25	26.4286	13.5962	29.8	30	0	19.997	6.15	4.9	10.5	0	0	14.575	2.3375
0	37.225	13.9286	9.74615	7.2	28.05	9	18.7714	7.01	27.1	4	0	0.583333	4.61667	1.16667
0	35.8	22.1429	5.07692	12.3	12	0	14.9238	5.1	1.4	0	4	0	3.15	1.3
0	45	13.8571	9.02692	37.4	48.15	0	12.5905	5.2	2.55	2.5	3.375	0	12.5	2.125
0	33.99	12.05	2.73077	23.2	47.25	0.35	9.50476	6.85	8.55	5.71429	1.35	0	12.5	4
0	37	10.6286	6.46923	0	31.5	7.5	7.14286	7.56	5.35	0	6.25	1.45833	3.75	3.5
0	0	0	0	0	0	0	0	0	0	0	0	0	0	0
0	34	3.85714	4.11538	10	0	0	1.71429	45.1	14.05	0	15	6.34167	10.4167	9.6875
0	0	0	0	0	0	0	0	0	0	0	0	0	0	0
0	23.3	12.2743	9.61923	4.76	21.3	0	17.8302	6.335	2.1	1.5	5.2625	1.16667	11.9167	2.42917
0	19.7	7.79286	9.61346	7.95	37.05	12.5	16.2138	12.167	21.225	11.9143	2.5	5.08333	21.875	6.45833
0	42.2	25.35	16.1538	14.8	12	1.575	13.9286	11.375	25.6	8.78571	1.75	0.408333	7.875	2.6875
0	26.2	10.7143	6.41346	14.8	30	4.5	10.8946	18.34	29.17	9	0	1.925	15.25	2.625
0	41	11.4286	14.3577	9.675	4.2	0	17.6833	29.94	31.27	10	4.3625	1.925	28.6458	3.78125
0	42.8	30.3571	9.19231	14.8	0	0	18.6643	33.9	0.49	7.5	4.8625	0	19.7917	2.375
0	28.54	14.5357	10.6154	5.675	12	0	15.4476	13.8	37.8	12.8571	5.5	2.04167	27.75	5
0	48.6	24.2857	9.03365	13.5	4.2	6.75	21.5667	7.6	1.4	3	9.25	0	12.5	2.83333
0	44.95	12.8571	19.5019	13	0	4.5	7.77214	14.1	20.9	4.15	5	0.583333	11.8125	2.625
0	31.2	13.8571	11.6673	14.8	4.2	6.55	13.5595	13.75	21.89	6	5	1.69167	8.85417	2.23958
0	51.8	25.7143	10.3846	19.5	0	0	15.421	27.7	3.5	6	5	0	17.75	5.125
0	48.5	33.5	8.63846	17.8	12	7.5	18.481	4.52	2.8	0	0.7875	0	13.5	4.5
0	0	0	0	0	0	0	0	0	0	0	0	0	0	0
0	47.2	10.2571	14.8	19.7	0	0	22.9212	3.7	10.49	0	5.875	0.583333	18	11.925
0	39.25	3.16	16.4731	4.64	4.5	0.8	13.9845	8.2	7.79	11.2214	5	7.5	13.6667	8.65833
0	29.3	5.87143	12.5288	9.64	16.35	0	27.9167	5.95	19.59	0.9	4	9.58333	2.91667	4.79167
0	0	0	0	0	0	0	0	0	0	0	0	0	0	0
0	45.7	4.42286	4.5	12.2	55.5	0	28.8476	2.7	0.7	2.5	2.3125	0.583333	11.6667	6.08333
0	28	11.1429	15.8462	6.3	31.5	0	19.5771	4.32	3.425	0	3.25	5.08333	5.83333	2.625
0	39.8	7.28571	24.6192	5.24	21.9	2.78	27.4721	5.95	3.73	2.5	6.25	4.46667	8.16667	9.73438
0	52.3	2.71429	22.7115	5.38	34.5	3.3	27.696	5.6	30.215	5.5	3.85	11.1667	10.4167	2.375
0	40.8	4.98571	12	7.43	2.52	0.21	19.1352	6.1	6.025	5.28571	0	2.33333	6.5625	2.44792
0	0	0	0	0	0	0	0	0	0	0	0	0	0	0
0	39.15	15.2143	24.4038	4	13.65	1.75	19.646	6.07	13.59	1.75	3.85	14.0833	8.5	3.83333
0	38.5	22.3929	5.44308	14.8	0	0	14.2429	11.93	26.3	3	3	1.575	10.25	3.75
0	22.17	5.99286	6.34808	6.81	13.5	7.875	10.1719	25.25	2.1	1.5	2.75	6.24167	15.125	2.6375
0	42.9	25.7143	15.9423	14.8	12	0	14.5119	2.3	11.4	0	0	0	8.33333	8.33333
0	54.5	26.4286	7.5	14.8	36	0	17.55	29.9	6	7.5	6.5	0	10.25	5.375
0	57.1	32.5	18.9615	15.91	7.65	2.5	17.9757	5.596	7.84	5.5	0.35	2.56667	11.1375	3.20375
0	29.8	25.7143	9.11538	37	30	0	19.3571	25.9	0	0	1.75	0	7	1.63333
0	49.6	25.7143	7.5	37	4.2	0	18.5417	7.6	1.4	0	6.5	0	10.5208	1.92708
0	30.8	25.5714	12.7846	37	12	0	13.4924	0	0	0	1.3125	0	9.16667	3.95833
0	33.9	3.31357	4.45385	4.7	24.6	4.375	17.5267	4.91	3.5	7.5	3.5	0.816667	13.6458	2.96875
0	32.35	8.44286	5.28077	28.1	41.55	3.15	16.1731	8.4	1.4	0	1.5	1.225	9.375	5.01562
0	30.9	26.4286	9.5	20.8	30	0.7875	15.9744	10.65	6.09	6	3.1875	1.45833	6.85	2
0	32.2	26.4286	12.7308	14.8	12	0	23.469	44.7	24.4	10.5	5	0	16.875	3.25
0	36.5	12.66	15.6846	26	45	3.2	22.4386	11.335	7.83	10.5	7	1.16667	10	3.05
0	30	18.2143	32.1346	26.86	45	0	24.4857	5.245	12.99	3	4.5	0.583333	18.6667	7.33333
0	45	27.1429	7.83654	14.8	4.2	2	12.6571	1.8	0.49	0	4.75	0	2.60417	1.61458
0	20	8.32143	8.57692	30.96	29.25	0	27.1605	5	5.4	0	1	1.16667	22.5	7.3375
0	21.2	23.9286	16.7385	12.8	0	1.575	14.3048	20.5	1.19	7.42857	7	2.04167	10.5833	1.25
0	68.8	11.9929	16.0577	10.3	27	0	20.7757	14.91	10.18	2.5	3.5	1.16667	26.75	10
0	49.7	9.01429	18.0615	13.3	20.25	0	16.2067	7.85	0	2.5	2	0	10	2.2125
0	50.4	23.6786	11.9423	12.8	0	6.75	15.0143	18.825	11.9	6.5	2.275	2.1	11.6667	2.75
0	31.9	26	21.1923	18.4	0	3	13.1143	10.3	4.89	5	6	1.925	4.58333	2.17708
0	40.28	25.7143	8.84615	12.8	12	3	12.1857	31.85	24.48	11.4286	0	2.33333	15.0208	2.1875
0	36.5	23.9286	16.3462	20.8	30	2.3625	13.6929	16.45	32.6	21.4286	6	3.09167	8.66667	2.04167
0	15.35	11.0571	4.36538	5	10.5	0	20.0614	9.54	22.35	1.5	0	5.25	20	2.53333
0	36.7	31.7143	43.9038	10	12	5.9275	21.4583	10.645	22.58	6	0.4375	1.75	10	6.29167
0	55.2	14.2143	23.35	12.84	43.5	6.6875	16.694	6.89	35.43	6.96429	3.6125	9.29167	8.75	3.54167
0	0	0	0	0	0	0	0	0	0	0	0	0	0	0
0	51.1	32.1429	6.28846	3.08	0	1.05	13.9807	28.8	9.6	10.5	8	2.50833	11.6667	2.50833
0	28.6	12.8571	8.99135	15.6	12	1.05	14.8964	11.125	2.87	3	2.275	2.04167	9.9	2.475
0	0	0	0	0	0	0	0	0	0	0	0	0	0	0
0	31.29	13.6	6.95577	17.96	18.75	2.1	18.6698	5.76	28.045	14.2857	6.375	1.75	8.1	2.35125
0	24.8	26.4286	9.7875	14.8	12	0	15.4545	20.3	3.85	7.5	6	1.98333	5	2.25
0	22.725	25.75	8.86635	5.18	48	0.49	14.694	4.95	24.9	2	0	3.325	8.33333	1
0	13.775	26	14.1269	14.8	5.1	0	15.1345	15.925	2.94	0	8	2.91667	10.2083	2.91667
0	37.55	7.5	11.8077	9.66	6	0	17.659	6.19	3.5	0	0.35	0	10	2.39167
0	25.28	24.6429	8.30769	14.8	4.2	1.575	14.9881	16.8	2.52	6	5.8625	2.74167	13.8542	2.55208
0	33.96	7.84571	11.1315	22.6	36.75	0.8	27.6262	11.9	5.6	1.5	1.05	0	17.5	3.375
0	0	0	0	0	0	0	0	0	0	0	0	0	0	0
0	0	0	0	0	0	0	0	0	0	0	0	0	0	0
0	35.28	12.7214	6.12385	16.65	20.25	0.875	21.4257	6.56	2.8	0	2.35	0.583333	6.66667	2.4375
0	32	11.9571	8.84615	35.01	4.5	0	11.1286	6.91	1.4	0	1.7875	0	25	5.125
0	43.2	7.70714	9.35769	12.94	0	0	20.3976	7.8	2.45	0	2.85	2.33333	14.8667	3.16667
0	53.2	14.1214	9.03462	32.8	4.725	0	30.7971	3.2	3.5	0	1.7	0	6.25	4.3375
0	26.28	8.98857	6.69231	11.2	6.6	0	19.1143	5.18	4.9	2	1.45	2.33333	20.5625	7.20417
0	26.2	23.8571	16.3606	37	60	0.7	14.3488	16.8	29.1	0	6.5	0.583333	13.75	1.925
0	0	0	0	0	0	0	0	0	0	0	0	0	0	0
0	32.2	27.8571	18.3606	34	4.2	0	15.0548	33.4	6.3	7.5	7	0	10.95	3.075
0	33.78	12.6143	9.40077	12	37.5	0	22.7776	2.26	4.095	2	1.35	2.33333	11.8333	3.5
0	47.2	26.4286	12.6644	20.8	0	0	13.5286	7.85	30.29	4.5	0	1.28333	23.25	7.125
0	61.725	8.14286	10.9231	31.61	0	0	28.9836	2.296	3.5	0	0	0	5.75	1.13563
0	27.6	13.5714	22.8846	16.2	11.1	0	21.5357	12.725	6.93	3	1.925	1.69167	13.5417	1.97917
0	77	10.15	8.51231	2	1.575	0	12.0726	3.2	4.48	0	0	0.583333	3.33333	1.79167
0	55.1	40.3571	24.3038	22.2	18	8.375	21.9238	21.3	4.2	6	7.5	2.625	23.75	2.125
0	0	0	0	0	0	0	0	0	0	0	0	0	0	0
0	47.2	30.3571	13.8462	14.8	0	2.3625	15.6869	5.6	0	3	7.0375	0	5.83333	1.75
0	24.8	27.1429	11.025	20.8	34.5	2.1875	13.4119	14	7.5	3	5.25	2.21667	7.875	2.5
0	34	27.1429	10.9721	13.5	12	1.925	13.8107	15.225	4.2	4	5.75	2.33333	15.125	2.75
0	25	23.5	16.5769	5	18	5.5	12.2471	3.88	7	0	0	2.33333	6.66667	6.40833
0	57.95	28.8	20.5962	14.8	4.2	4	15.4238	32	14.175	7.5	8.1125	2.39167	8.54167	2.34375
0	38.8	22.8286	10.7846	29.84	15.75	1.4	15.331	8.235	7	0	2.35	0	8.125	1.77937
0	0	0	0	0	0	0	0	0	0	0	0	0	0	0
0	39.2	22.9286	12.2692	28	30	0	15.625	18.9	16.65	17.1429	4.6875	0	5.25	1.875
0	37.95	25.5	12.2462	31	12	0	14.9048	17.95	2.8	0	1.75	0	7.29167	2.39583
0	30.8	6.10286	9.73462	3.6	22.5	0	21.4062	4.18	4.55	6	3.75	0	12.75	7.0625
0	32	11.7743	7.80769	6.96	0	0	15.6648	11	3.815	14.2857	0	1.16667	23.25	7.875
0	27.35	23.8214	16.875	20.8	25.5	33.25	17.9024	11.5	32.4	21.4286	0	1.69167	9.8875	5.90625
0	43.5	23.8571	11.3231	34	15	0	15.2143	22.4	0	0	5	0	11	1.83333
0	48.35	27.1429	7.5	32.525	0	0	13.2857	1.05	4.9	0	5	0	3.5	1.07917
0	61.9	9.76429	8.31538	10.86	0	0	19.9412	5.38	1.75	7.5	2.5	0	11.6667	3.26667
0	63	26	16.7308	34	25.5	2.3625	16.7333	19.13	10.5	0	5	2.04167	11.6667	1.925
0	40.8	26.4286	18	37	12	0	15.7	16.73	7.07	0	5.5	0	4.33333	1.375
0	33	23.1429	27.5	13.5	3.15	5.225	16.0548	7.2	10.5	0	5	0.408333	11.4583	1.5625
0	42.2	18.25	14.1096	28.36	13.5	4.5	20.1167	7.55	3.94	4.5	5.025	2.91667	8.9375	4.10938
0	71.2	31.1429	8.75385	28.02	19.65	2	24.1005	4	2	7.71429	2	0	10.2083	3.83542
0	30	15.5714	8.30769	28.8	9	0	13.1529	4.95	20.5	21.4286	2.5	1.75	5.6875	3.1125
0	42.3	21.3143	14.424	17.5	12	1.05	15.7833	10.125	4.2	6	6.0375	2.91667	6.25	2.44792
0	38.1	27.1429	21.1154	14.8	6	10.25	15.8738	19.675	29.45	4.85714	7.25	9	5.3125	1.09375
0	28.4	23.4286	16.6394	14.8	30	3	14.4417	8.77	9.25	2	5.25	1.575	18.9583	5.25
0	35.1	27.8571	15.6731	13.64	14.55	7.75	15.3952	7.45	1.89	0.857143	6.0375	2.33333	6.25	3.28125
0	34.7	22.4286	14.2308	14.8	9	0.875	14.1981	6.84	22.8	1	4.75	1.69167	18.3333	3.33333
0	35.225	32.1429	14.1692	14.8	48	4.5125	14.9952	26.8	32.05	17.1429	6.25	8.24167	15.625	5.83333
0	40	16.6786	6.61538	10.68	8.1	3.1375	10.8624	14.2	0	7.71429	4.9375	1.925	20	4.375
0	19	5.64286	8.63846	34.44	5.46	0	7.19405	15.2	5.6	4.5	0.35	2.33333	15.1875	6.79688
0	21.7	4.65	4.68269	14.16	3.15	0.35	12.8443	9.346	4.27	5.75	1.875	3.38333	10	6.875
0	47.8	27.1429	10.125	32.35	0	0	14.2024	8.4	4.2	0	5	0	5.0875	1.85625
0	50.65	32.1429	5.46154	37	0	0	15.6148	4.5	0.49	0	6	0	8.1	1.8
0	49.6	15.6714	10.2192	34	18	0	24.339	5.25	1.89	3	4.875	0	14.5833	4.34375
0	33.6	27.5	22.4279	37	30	6.75	15.7952	25.9	13.23	15	5	1.63333	12.0167	2.56667
0	50.15	23.1071	16.2885	37	30	2.45	16.55	9.8	4.2	7.5	1.3125	1.4	19.4792	3.55208
0	31.68	27.5	19.7356	32	22.5	1.75	14.7857	14.6	3.99	7.5	6	0	11.4583	2.29167
0	24.7	21.8571	8.11538	37	12	0	14.2429	1.96	1.89	4.5	5	2.04167	9.79167	6.04167
0	36.8	26	14.5538	37	4.2	0	16.0738	7.05	4.2	1.5	5.5	0.583333	16.6667	7.41667
0	18.6	8.02857	13.4154	12.95	30	0	21.1519	2.8	26.58	1.14286	0.7	2.33333	9.58333	1.51042
0	19.7	11.0643	20.0692	13.26	9	5	21.68	15.96	7.05	3	2.35	1.75	14.5	1.8125
0	49	26	13.0731	34	8.4	0	16.6857	8.5	7.7	3	5.5	1.10833	8.14583	2.10833
0	44.1	25	16.2654	37	12	7	18.6333	35	7	10	3.75	0.408333	7.5	2.75
0	22.255	5.28714	3.17923	7.95	11.235	0	18.4995	3.1	27.1	1.5	0	0.233333	11.6667	3.50833
0	32.8	12.3857	11.8196	12.8	33.75	0	11.1571	8.65	3.5	0	1.275	2.74167	25.175	2.71875
0	54.1	26.4286	9.58654	34	4.2	0	15.5405	10.4	1.4	0	4.5	0	5.72917	1.14583
0	46.5	22.4429	11.1587	37	30	1.575	15.2786	5.246	0	4	3.5	0.291667	13.125	2.5
0	51.5	23.4286	16.8846	37	30	0.7	15.565	9.55	27.7	12	3.25	2.04167	14.7292	4.59375
0	39	14.8714	8.24269	3.6	0	1.8	17.3333	22.25	1.49	12.8571	1.7	1.63333	18.8125	1.84375
0	37.5	9.78571	5.70385	11	0	0	21.4279	4.06	0.7	0	1.05	0.408333	16.6667	1.78333
0	30.8	26.2857	11.2096	8.3	30	0	15.7131	7.95	6.59	0	1.225	0	8.54167	2.08333
0	28.6	26	13.6971	26.8	4.2	0	16.2406	16.3	28.4	15	4	1.80833	9.16667	4.125
0	38.8	22.1429	9.38462	37	9.6	4.5	13.7119	11.75	3.5	0	5	0	8.4375	2.30625
0	40.5	25.7143	16.9615	37	30	3.9	16.0214	15.4	37.5	17.4286	0.875	2.04167	38.5417	6.14583
0	34.68	16.0286	12.2692	6.31	29.25	0	25.3171	8	26.98	18.5714	3.1125	2.91667	12	7.5
0	44.2	26.4286	26.2981	12.8	7.5	0	15.3393	14.85	24.76	12	1.05	1.575	18.6083	1.32917
0	32.8	26.4286	13.0865	14.8	12	0	14.6625	5.4	1.4	6	1.75	0	8.4	2.1
0	34.8	26	12.6202	14.3	12	1.575	15.0512	15.3	3.5	4.5	4.5	0	3.5	1.05
0	25.35	5.93571	9.82538	13.66	2.1	0	17.5051	8.9	7.1	4	4.1125	2.15833	13.375	1.83438
0	0	0	0	0	0	0	0	0	0	0	0	0	0	0
0	26.2	16.2857	8.085	28.55	78.75	2.5	11.6446	7.8	36.15	20	0	4.55833	10.125	1.35
0	29.31	10.8514	19.3965	12.785	20.25	0	14.8712	5.3	8	7.14286	0	1.98333	15	3.20625
0	35.8	26.4286	11.2788	26.8	12	6.75	16.0333	7.35	3.99	7.5	5	0	12.9375	3.125
0	34.5	8.35714	9.63462	5.1	0	0	20.3025	2.96	6.4	0	4.85	0.816667	8.33333	3.5
0	37.55	18.0714	8.60808	6.04	14.4	0	24.583	7.245	11	5	6.5	5.13333	8.02083	2.30417
0	44.9	26.4286	15.5154	37	30	1.925	16.5595	21.05	7	6	5	0.408333	14.7917	3.125
0	40.8	26.4286	8.07692	37	7.5	0	15.9667	5.6	1.4	0	4	0	7.75	3.5
0	31.45	47.6786	11.5769	40.5	34.5	29.6	22.2929	19.25	17.13	9.64286	6	2.33333	14.5833	3.54167
0	34	21.2143	10.8846	31.6	40.875	4	13.5238	23.55	13.9	19.2857	4.2	4.78333	23.3333	7.58333
0	76.05	10.1071	9.05769	3.5	7.5	0	7.29762	1.4	0	0	2.5	0	3.125	2.29167
0	60.7	14.8857	6.92308	22.4	13.5	0	20.3095	4	1	0	4	0	5.5	4.2625
0	38	10.7857	6.38462	52.4	1.05	0	3.26667	5.26	5.49	4	2.5	0	6.66667	4.45833
0	40.34	27.8571	6.55769	32	0	0	10.2143	23.91	3.54	2.5	7.5	0	13.75	6.625
0	49.35	23.5571	5.19231	22	30	3.7	12.0714	3.5	11	8.57143	5.5	1.66667	5.83333	3.66667
0	43.84	13.2857	6.82692	6	1.26	0	2.32381	6	4.5	1	2.5	1	4.16667	1.35417
0	42	44.8857	12.0769	30.4	0	0	14.6667	4	1	0	25	0.466667	5.5	2.95625
0	41.68	24.6429	11.4712	9.5	4.2	0.7	13.2643	11.55	5.25	1.5	1.3125	0	11.6875	2.6125
0	0	0	0	0	0	0	0	0	0	0	0	0	0	0
0	60	25.7143	11.3077	42.6	46.05	0	20.5069	8.93	2.45	5	4.625	0.583333	10.9333	4.13333
0	45.525	13.6714	4.38077	22.2	53.55	4.75	21.5205	26.35	4.48	5	3.75	3.20833	18.75	4.42708
0	18.305	11.4286	14.875	12.8	12	1.05	10.5286	14.75	32.4	9.71429	1.75	2.33333	5.83333	2.5
0	33.5	11.4286	10.7519	8.3	30	0	9.64881	4.095	22.58	4	8.75	3.20833	3.33333	2.20833
0	38	19.1429	11.6731	20.388	16.5	0	15.4405	6.96	3.99	0	1.875	5.075	8.33333	4
0	56.5	9.89286	11.5692	18.6	66	0	20.011	9.45	1.4	0	3.75	1.75	8.33333	4.38333
0	21.5	24.2857	9.19808	14.8	30	0	12.8	3.3	22.65	3	5.6875	0.583333	12.8333	3.25
0	36.5	39.5714	14.8077	34	6	0	17.8119	5.6	4.9	3	6.45	0	4.5	3.375
0	30.5	25.7143	11.5625	13.5	12	2.205	14.0619	9.25	16.475	0	5.6875	1.80833	15.1042	4.01042
0	27.28	6.86429	16.6	10.26	6.75	0	15.7046	4.145	12.98	3.5	0	2.33333	23.125	8.51042
0	32.09	9.31429	13.8125	7.232	17.1	4.5	11.1702	13.1	6.4	7.21429	1.25	2.5	15	7.1875
0	32	17.8571	2.30769	9	9.75	0	8.75	2.15	5	0	5.625	0	10.4167	4.27083
0	41.9	33.1429	11.1731	23.1	31.725	2.5	14.1976	1.33	11.05	7.14286	6.25	2.83333	17.5	6
0	26	0	0	0	0	0	0	0	0	0	0	0	0	0
0	58	33.8571	2.30769	42.4	35.25	0	16.1071	3.2	0	0	0	0	5.41667	1.5625
0	34.4	20.2286	16.6596	11.6	4.65	1.68	9.97262	3.862	30.7	1	5.4375	1.75	4.16667	1.09375
0	32.25	12.6429	15.2885	4.87	27.75	0	12.9643	9.23	6.2	10.6429	3.2875	6.16667	15.0833	2.91667
0	28.64	26.5571	14.8769	31.2	11.25	2.5	20.919	24.4	20.8	18.8571	2.1875	8.66667	21.6667	9.6875
0	45	16.4429	12.4	48.2	1.575	0	15.5714	1.89	5	2.5	3.375	1.4	13.3333	11.9583
0	0	0	0	0	0	0	0	0	0	0	0	0	0	0
0	30	30.7143	6.77885	46.52	15.0975	0	22.6667	4.05	11.05	0	4.625	0	9.58333	6.66667
0	19.4	14.9286	7.78365	10.2	7.575	3.8125	11.6905	6.525	9.5	6	6.25	2.79167	13.5417	6.30208
0	23.14	3.80357	3.70673	5.45	5.46	0	3.26595	4.452	3.45	2.5	1.225	0.525	3.75	1.1375
0	49.2	5.57143	9.42308	0.84	7.8	0.49	17.0452	5.5	5.35	2	1.275	0.583333	7.0125	2.0625
0	50	3.42857	10	0.42	7.8	2.24	20.0964	12.8	7.5	0	0	1.16667	45.5042	6.28125
0	48	6.71429	6.5	11.3	24.15	0	9.70952	15	5.85	2	2.9375	0	15.625	2.59406
0	26.785	10.8829	12.2654	4.688	11.175	0	10.0395	5.5	1.05	1.5	11.875	0	8.85417	3.19792
0	77.1	15.8214	17.9231	11.16	16.35	2.5	16.2381	18.3	2.8	11.0714	8	5.14167	11.4583	3.22917
0	40.8	6.96429	7.65385	12.84	0	0.49	10.3333	0.83	0	0	2.5	0.583333	4.16667	2.55208
0	32	4.85714	8.92308	17.62	29.25	3.125	8.25238	6.6	0.525	2	3	0.583333	8.33333	2.34375
0	40.8	9.07143	8.5	3.52	61.5	0.49	21.0667	8.48	3.55	3	7.5	1.16667	8.8	3.575
0	0	0	0	0	0	0	0	0	0	0	0	0	0	0
0	47	3.57143	15.1346	10.42	4.41	0.35	8.21429	2.5	5.6	2	2.75	0	7.08333	4.53333
0	25	12	16.1154	9.84	0	0.35	14.0762	18.95	13	0	3	4.09167	14.1625	1.71875
0	25.19	26.7857	14.7558	37	30	6.75	16.431	16.9	3.08	4.5	5	1.63333	7.8125	1.71875
0	57.95	17.7857	10.0308	27.2	39	1.2	31.4757	6.75	4	0	8.75	0	15	5.8125
0	28.85	13.5	5.56538	14.8	4.2	0	14.4345	5.12	21.61	0	0	0	14.3542	6.09375
0	0	0	0	0	0	0	0	0	0	0	0	0	0	0
0	57.8	19.4	17.8038	28.06	13.5	0	26.3881	14.1	5.49	2.5	8.75	0	11.1833	3.20833
0	22.9	13.1786	15.55	11.21	34.8	0	22.9917	5.04	32.1	6.2	0	2.33333	23	5.05
0	76.85	12.0714	10.1923	7	36.75	0	21.7476	11.92	4.25	0	7.5	0.583333	4.33333	2.125
0	49.4	10.4286	12.7692	9.15	20.25	0	26.5929	7.9	6	2.5	8	0.408333	17.5	4.75
0	23.22	7.98571	17.4538	13.15	10.5	0	22.419	6.824	2.4	2.5	0	1.45833	10.1667	2.45
0	32.2	25.7143	23.7692	37	30	6.75	15.6881	9.4	8.75	21.4286	5	2.04167	17.6458	4.125
0	0	0	0	0	0	0	0	0	0	0	0	0	0	0
0	37.17	15.25	2.93846	19.5	4.41	0.35	6.53333	3.7	1	1	6.225	0	6.66667	4.16667
0	38	29.1429	12.25	4.62	27.45	1.225	10.4929	4.475	2.225	2	10	1.16667	16.6667	6.5
0	33.25	14.9	17.8077	10.76	20.25	1.4	6.51714	19.675	30.88	5.5	1	1.16667	10.6667	4.16667
0	31.75	18.5357	7.14423	5.42	42.6	3.25	9.4881	5.98	25.7	0	0	2.91667	12.5	2.23958
0	27.6	5.64286	21.9231	8.6	33.75	5	11.7881	2.58	26.4	1.5	1.9375	3.75	7.29167	2.22396
0	50.59	3.99286	2.23846	3	3.15	7.5	4.12619	11.55	1.575	6.28571	0	0.875	7.29167	3.93229
0	34.8	11.1357	15.4808	1.68	21.51	0.4375	8.58095	11.05	8	1.5	0.4375	0	10	7.75
0	58.2	16.2143	11.6885	14.2	15.75	2	12.1429	21.25	21.53	2.5	2.5	2.91667	8.25	2.95625
0	38.35	8.03571	18.2019	20.2	63	1.5	14.9352	4.2	9.9	7.85714	0.85	3.75	10.4167	2.22917
0	51.55	16	5.42308	6.78	22.5	0.7	5.79286	4.61	3.99	0	4.1875	0	6.25	3.02083
0	36.5	23.0714	7.57692	9.1	69	0	9.01905	6.645	27.7	8.57143	15.25	13.5	5	3.41667
0	19.25	8.15714	25.1923	19	0	1.4	13.9143	8.1	2.2	2	1.4375	1.16667	10.4167	0.729167
0	22.7	11.1243	9.13462	12.4	39	3.75	7.2619	8.5	9.4	3	10	3.06667	6.875	4.2625
0	52	18.2857	7.69231	8	6.225	0	11.7143	11.5	6.9	1.5	2.5	0	8.33333	6.04167
0	23.575	19.7679	36.2067	5.2	27	11.67	17.5524	1.35	26	1.92857	0.4375	6.41667	9.58333	2.5625
0	37.5	14.3571	15.1538	14.4	0	12	4.47381	10.1	9	4.28571	6	0.8	8.25	3.85
0	61	10.6714	3.34615	24.8	15.6	6	18.9821	11.75	9.3	4	1.5	2.54167	8.33333	4.89583
0	47	16.8143	10.5962	8.8	15.6	0	11.3524	6.15	29.25	5.71429	1.575	0	1.7875	1.61563
0	28	8.31429	7.44231	10.5	8.1	0	7.42857	5.525	2.4	3	5.25	0	5.5	2.81875
0	20	8.41429	11.7692	2	0	0	5.47619	17	4.125	17.1429	6	0	5.41667	4.89583
0	25.15	9.44286	15.6346	12.4	0.7875	1.2	25.6688	14.1	43.75	5.48571	5.75	7.66667	7.58333	3.64583
0	61.85	13.8114	11.3462	24.6	1.26	2.5	16.7905	2.25	1.09	1.5	10.125	0	12.875	5.375
0	26.385	0.97	3.68942	3.1	8.7	0	4.87381	3.695	10	0.5	0	6.775	11.8708	4.08333
0	41.28	6.27143	14.0192	13.6	7.41	3	30.6429	5.4	28.6	5.71429	2.625	2.15833	10.25	3.625
0	40.8	6.85714	20.0962	9.3	31.26	1.4	22.7638	8.025	15.15	5	19.0125	3.41667	23.3333	2.91667
0	35.8	22.7571	9.93269	31.6	4.41	0	27.4536	2.5	1.09	1.5	11.25	0	7.4375	2.84375
0	28	6.18571	19.1192	7.3	28.05	0	25.5807	8.7	6.75	14.2857	4.125	5.25	14.5833	7.08333
0	45	0.5	11.9231	30	0	0	20.0952	0.7	0	0	18.75	0	3.75	1.875
0	0	0	0	0	0	0	0	0	0	0	0	0	0	0
0	34.54	8.14286	16.2692	3.45	7.5	0.7	8.50714	9.53	34.425	4	1.6875	1.75	12.7083	3.64583
0	50	12.9229	8.79423	13.3	11.1	0	26.1971	4.65	1.525	3	10	0.583333	18	7.3375
0	39.32	14.1429	7.82308	10.64	40.8	2.9625	9.29048	13.25	14.8	7	11.25	1.75	20.625	7.975
0	45	24.6429	5.46923	37.2	1.3125	0	12.4048	2.6	11.8	0	0	0	3.275	1.53125
0	15.8	8.57143	15.6712	8.4	12.6	1.2	13.1357	1.8	3.75	2	0.7	0	9.58333	2.39583
0	32.7	7.14286	8.21154	10	1.575	0	10.1595	2	2.8	1.5	0.175	0	11.4583	2.86458
0	32	1.42857	7.76923	7.5	12.6	0	8.40476	5	8.55	0	0.4375	0	8.25	1.16875
0	32	7.85714	7.42308	10.76	6.15	0	15.25	4.65	1.5	0	1.2625	0	9.625	2.2
0	53.3	9.07143	8.36154	26.62	18	1	16.9536	12	5.8	4	5.5	2.83333	11.6667	3.125
0	29.4	12.7143	12.4712	23.8	3.6	2.05	16.419	8.98	9	0	10.5	1.75	10.8333	3.48958
0	33.24	12.6429	23.6154	10.468	17.4	12.25	12.5286	13.105	8.555	2.5	0.875	0	21.1458	5.87708
0	43.85	5	17.5	7.44	12.6	1.35	9.14226	6.33	5.15	0	1.4625	2.83333	30.7083	5.025
0	33.91	15.4286	16.8481	17.56	6.3	1.4	16.2286	3.7	2.69	2.5	2.8	1.575	15.8333	4.83333
0	32.5	7.71429	11.3269	3.75	13.65	2.75	12.331	6.05	29.6	4	0.2625	7.00833	9.625	2.81875
0	50	4.57143	7.92308	5.2	20.1	0	12.6714	5.925	1.75	2	0.75	1.66667	13.3333	6.25
0	0	0	0	0	0	0	0	0	0	0	0	0	0	0
0	25.05	5.84571	4.96923	5	18	0	10.6962	7.5	0	2	14.875	0	5.5	4.60625
0	0	0	0	0	0	0	0	0	0	0	0	0	0	0
0	64.7	43.7143	10.0577	62	42.9	12.5	6.43333	12.76	6.05	1.5	7.5	0.583333	22.5	5.875
0	45.85	20	12.9481	24.87	0	5	7.43333	42.1	6.45	4	0.4375	2.975	3.25	3.33333
0	51	20.1714	10.8269	32	39.75	0.875	15.9286	19.71	9.2	4.28571	2.5	1.05	20.8333	5
0	24.525	15.1429	12.6923	6.3	12.075	6	10.95	18.85	4.56	4.10714	0	4.08333	16.6667	5.41667
0	51.3	40.0857	27.3885	35	0	4.5	20.8214	28.1	9.1	1.5	13.275	3.875	5.5	4.60625
0	34.4	57.0714	27.0385	100	31.5	5.65	31.5952	4.75	39	28.4286	1.625	4.5	12.5	3.875
0	48.2	23.9286	8.30769	25.1	30	0	19.0976	4.75	1	0	2.5	0	11.25	1.875
0	27.35	27.5	16.4048	37	12	1.575	16.2357	10.25	22.8	12.8571	4	1.16667	6.4375	1.28125
0	25.2	10.9	12.1846	17.55	20.25	0	29.8962	5.4	32.8	15.2143	0	1.51667	12	2.86667
0	39.5	26	18.9087	34	30	3.75	15.2619	16.1	2.1	7.5	5	0	22	2.75
0	45.7	12.5	11.0096	30.2	45	0	30.6643	4.98	3.5	5	2.6875	2.33333	16.6667	5.975
0	0	0	0	0	0	0	0	0	0	0	0	0	0	0
0	0	0	0	0	0	0	0	0	0	0	0	0	0	0
0	55.28	26.4286	8.69231	34	12	0	18.8786	8.4	1.4	0	6	0	4.66667	3.26667
0	0	0	0	0	0	0	0	0	0	0	0	0	0	0
0	0	0	0	0	0	0	0	0	0	0	0	0	0	0
0	29.2	27.1429	16.201	37	12	10	14.8429	5.55	36.05	8.57143	4.25	2.04167	15.4167	1.375
0	55.15	32.1429	10.2462	32.7	30	3	15.2405	14	6.3	15	20	0	6.5625	3.20833
0	38.6	24.5714	10.5683	14.8	15	3	13.0619	9.25	1.05	4.5	1.4	0	4.16667	1.19792
0	10.7	5.20714	11.4615	27.6	0	1.75	21.0905	1.4	0	1.5	0	0	11.6667	2.95
0	46.3	13.8214	8.57692	21.84	46.5	5	20.4638	5.04	0.98	2.5	6	0.583333	7.29167	4.76875
0	0	0	0	0	0	0	0	0	0	0	0	0	0	0
0	0	0	0	0	0	0	0	0	0	0	0	0	0	0
0	34.2	27.8571	12.5683	13.5	12	3.4875	15.3101	27.65	1.75	4.5	5	2.39167	6.5625	2.08333
0	31.5	24.2857	14.3942	14.8	12	0.7	13.2386	10.6	9.45	3	7	2.625	6.66667	1.45833
0	16.98	10	3.46154	5	16.5	15.5	14.0395	25.85	0.8	1.5	5	1.16667	12.4833	4.05417
0	0	0	0	0	0	0	0	0	0	0	0	0	0	0
0	48	27.1429	7.46635	9.6	30	1.575	13.419	12.05	4.69	4.5	0	0	10.75	3.75
0	37.17	7.75	15.5038	10.27	0	2	23.6143	19.7	21.675	10	2.2625	2.91667	12	4.83333
0	24.4	15.5714	17.0154	13.5	4.2	0	13.9024	11.9	3.92	6	1.75	2.85833	9.89583	2.44792
0	48.12	9.71429	2.89231	12.9	28.5	0.525	10.2333	6.15	2.55	2.5	0	0	6.875	2.44062
0	56.95	11.3214	9.31923	15.2	16.125	4.6	11.5738	7.78	14.45	5	3	6.75	4.125	1.32
0	33.95	8.17143	6.32885	5.5	25.5	3.5	11.0536	4.25	37.65	3	0	1.75	10.8333	3.54167
0	0	0	0	0	0	0	0	0	0	0	0	0	0	0
0	25.26	17	4.42692	12.55	15	1.225	7.77619	6.4	11.7	4.28571	0	1.75	6.875	2.68125
0	43.77	6.78571	7.59038	12.5	31.5	3.5	6.08929	4.5	33.9	6.78571	3.75	0.875	5.5	2.85313
0	48.56	12	8.73846	4.4	13.5	2.5	7.32738	4.53	25.75	0	3.375	1.16667	10.4167	5.10417
0	26	9.07143	9.30769	11.5	21	3.2	9.26667	2	0.525	1	0	1.16667	3.47917	2.74854
0	41.5	10.9286	12.2788	14.2	32.25	3.8125	12.328	10.7	18.475	1.5	6.875	4	10.4167	4.89583
0	38.84	7.95714	12.3077	12.7	44.4	11	14.4333	7.35	25	1.5	3.875	2.04167	9.625	2.26875
0	49.56	14.7857	7.65385	23.2	21	6.95	9.98095	18.55	14.55	1.5	4	0	8.66667	9.2
0	28.48	12.8714	7.06731	13.2	19.05	3.025	10.0429	9.5	8.025	1.5	0.4375	5.66667	7.15	2.95625
0	32.7	9.62857	11.5769	2.4	19.575	1.95	9.4619	15.35	5.15	3.35714	7.5	2.33333	26.0417	7.5
0	22.5	28.5714	5.42308	31.8	5.1825	0.875	13.481	15.49	5.475	1	12.5	1.16667	12.5	10.5208
0	0	0	0	0	0	0	0	0	0	0	0	0	0	0
0	45	14.3571	8.05385	3.5	1.575	5	14.8571	10.73	13	1.5	0.7	0.583333	8.33333	3.22917
0	42.78	5.89286	5.82115	2.94	84	1.2	13.6976	6.34	12.5	10.6071	1.85	5.45833	11.6667	2.91667
0	30.35	12.8571	13.0385	6.73	34.5	4.0125	9.95905	19.25	20.875	10	3.625	11.25	16.8333	4.45833
0	28	28.8571	7.85577	2.03	31.5	14.5	7.09048	24.5	5.9	14.7857	12.5	5	15.75	3.25208
0	25.5	4.42857	7.51923	7.78	12.6	1.5	9.37381	3.655	20.825	9.14286	2.4	4.75	22.0833	5.625
0	60.3	18.4286	25.1058	21.7	30.75	1.05	12.4536	21.5	37.25	8.35714	5.525	11.8333	33.3333	8.22917
0	30	6.92857	7.10577	12.75	24	1.5	15.8643	9.8	13.75	2.5	5.35	2.83333	11.4583	3.33333
0	35	17.9357	5.26923	6.45	19.5	0	15.4857	7.5	2.5	0	0.875	0	10.1667	1.83333
0	35	7.14286	10.1923	6.4	37.5	17.5	24.125	25.425	18.8	47.25	1.5125	2.83333	25	12.9167
0	47	16.3143	8.44712	20.6	28.05	0.42	11.6667	8	5.7	2.85714	3.375	0.991667	8.75	6.14583
0	37	24.6429	8.26923	23.5	40.5	0	13.5762	5.25	8.5	2.85714	3.75	2.5	8.33333	5
0	57.5	34.2857	4.51923	52.3	0	0	9.19048	8	0.35	1	15	0	10.4167	7.91667
0	0	0	0	0	0	0	0	0	0	0	0	0	0	0
0	32	41.7714	10.9096	56	9.675	0	19.131	19	5	3	12.5	2.5	7.65417	1.67
0	27	23.3143	11.25	20.9	69	6.25	9.52619	8.125	30.85	5.78571	0.875	1.75	10.3292	4.88542
0	49.98	13.6643	21.5385	10.5	38.985	3	20.3774	29.2	10.89	12.0714	5	3.85	6.41667	3.55208
0	30.7	26.1429	7.73077	10	8.1	0	7.71429	2	0	0	0.525	0	4.16667	3.22917
0	35	44.8	3.94231	11.6	69	12.5	6.19048	17	38	6.71429	0	4.66667	7.5	2.25
0	30.7	51.1429	14.0788	21.5	39	0	8.45952	11	6.2	4.85714	1.5	2	6.875	1.85625
0	0	0	0	0	0	0	0	0	0	0	0	0	0	0
0	0	0	0	0	0	0	0	0	0	0	0	0	0	0
0	29.3	11.2143	9.40385	13.42	22.5	1.475	7.68571	9.85	22.7	7	3.3125	5.70833	7.29167	3.22917
0	36.325	14.9286	15.5885	9.87	45	2.175	6.5381	17.55	35.75	17.1429	3.875	6.95	8.33333	4.25
0	34.7	7.94286	18.3846	15.6	0	2	9.45238	16.05	5.375	5.5	1.6875	2.33333	20.4167	6.65
0	0	0	0	0	0	0	0	0	0	0	0	0	0	0
0	0	0	0	0	0	0	0	0	0	0	0	0	0	0
0	22.45	3.20714	2.36827	2.94	10.26	0.35	2.15595	6.18	18.93	3.3	1.1875	0.7	8.75	2.15625
0	0	0	0	0	0	0	0	0	0	0	0	0	0	0
0	29.09	38.6071	12.2981	25.2	30.6	0	9.42857	13.7	27.34	3.14286	3	0.75	21.25	7.75
0	26.55	22.9714	12.8	15.84	5.985	2	10.4771	11.83	7.44	0.5	0.4375	2.33333	15	4.9375
0	0	0	0	0	0	0	0	0	0	0	0	0	0	0
0	61	5.22143	3.15385	6.84	6.15	0	9.38333	3.95	8.09	0	5	1.16667	3.125	1.125
0	36.75	8.72143	13.5673	21.4	69	1.475	8.71071	9.9	6.3	10	2	4.08333	7.5	3.25
0	38.7	18.0357	23.5231	26.66	22.35	0.7	14.731	21.7	8.05	14.4286	21.875	3.91667	12.5	4.775
0	24.8	1.5	2.38462	1.47	1.3125	0	0.82381	5.14	1.4	0	1.875	0	5.83333	2.0625
0	30.875	3.22143	1.15385	7.95	9.225	0	13.7762	4.03	1.8	1.1	2.125	2.04167	8.125	4.125
0	47.35	14.7857	17.8462	46.82	0	0.7	9.02143	16.435	2.1	1.5	0.875	0	4.375	2.9375
0	47.8	11.8929	6.51923	2.8	49.5	0	11.4405	14.4	5.34	2.5	4	0	7.5	4.075
0	35	35.7143	10.5115	28.4	19.35	0.5	14.8048	3.4	9.28	4.5	4.25	1.98333	7	3.04167
0	30.85	43.1429	14.4615	14.82	63.6	0	11.9619	14.86	9	11.5	4.8125	5	20	5.875
0	46.4	9.5	0.538462	30	0	0	18.75	1.4	0	0	0.875	0	12.5	2.29167
0	62.45	21.1857	25.0769	31	18.75	1.4	12.8071	24.7	5	0	1	0	18.75	6.5
0	48	22.6429	6.50385	17.82	4.5	0	25.3214	4.055	2.945	1	5.625	0.583333	20	3.25
0	41.7	2.92857	11.7308	11.1	34.5	1.4	9.7619	13.55	5.2	1.5	0	0	20	1.875
0	49.26	20.5714	7.73077	11.03	22.5	2	9.44345	13.4	9.45	3.5	6.875	1.16667	15.125	6.08437
0	29.19	4.93571	4.11538	4.92	12.6	2	5.65643	9.355	3.94	2.5	2	1.45833	11.6667	3.16667
0	27.09	4.57143	10.8606	16	66.6	2	6.00952	17	4.37	0	0.5	0.583333	25	6.4375
0	30	16.6071	9.65385	19.94	26.1	0.7	11.2524	5.96	26.69	3	1.35	1.66667	10	4.11875
0	51.2	10.2357	14.7452	20.12	25.5	0.7	15.5089	24.9	15.29	6.5	9.5	6.83333	9.625	3.95312
0	43.35	8.17857	4.86154	12.7	5.25	0	10.269	12.05	2.5	1	3.675	0	16.6667	6.45833
0	40.15	10.35	5.94904	6.31	9.675	2	6.5881	9.95	4.43	2.5	3.5	2.91667	7.5	3.25
0	47	7.71429	26.5154	11.2	27	8.525	26.769	15.42	8.78	3	1	4.66667	10.5	5.69917
0	45	9.27857	7.65769	11	11.25	0	11.4	19.05	4.825	5.5	5	4.66667	8.5	2.5625
1	55.8	12.5	7.26154	4.79	18	14.5	13.981	2.3	7	0	2.5	0	10.5	2.17
1	52.92	6.64286	4.59615	6.38	22.5	3.9	8.54762	20.26	2.45	1	1.75	2.91667	16.6667	2.96875
0	41.99	4.19286	9.96923	15.1	10.05	4.425	15.3995	10.15	8.43	2.25	10	1.75	10.4167	4.0625
0	31	18.5	14.6058	25	57	2.45	14.3643	25.55	8.2	3	5.0625	2.25	18.3333	3.75
0	36.35	2.83929	16.0212	7.44	13.5	0	25.1805	6.8	3.1	1.65	7.25	3.33333	12.6667	3.26667
0	29.4	15.4643	4.98077	9.418	19.17	18.75	10.8719	1.25	27.25	18.8571	5	9.75	16.6667	2.83333
0	10.98	2.77857	4.66923	7.78	10.725	1.4	5.9369	3.9	5.2	1	0.875	3.5	10.8333	3.50833
0	32.92	9.55	6.61923	8.64	31.875	2.5	7.30595	7.35	10.2	2.5	0	0.583333	13.75	2.39583
0	27.42	10.55	3.81154	10.2	21.9	2	6.96429	10.2	9.6	3	0	2.91667	7.8375	2.3375
0	31.2	21.1429	8.30769	5.6	38.985	0.7	8.32202	9.1	5.6	4	2.5	2.83333	10.1667	3.41667
0	44.3	19	14.7115	25.8	30	2.5	10.9446	10.5	3.45	1.5	10	10.2917	11.6667	4.375
0	48	5.35714	5	6	16.5	0	12.6548	2.55	22.1	1	1	5.08333	20	10
0	0	0	0	0	0	0	0	0	0	0	0	0	0	0
0	43.28	5.57143	11.6077	5.8	15.6	0.7	13.5952	4.9	2.1	0	7.5	2.33333	27.2917	5.625
0	36	39.9	19.2308	22.2	7.5	0	17.2714	8.275	4.385	0	1.05	5.16667	14.5833	8.95833
0	48	30.6071	9.53846	26.1	1.05	0	24.4143	9.8	0	0.5	1.75	0	25	5.67708
0	47.52	5.64286	9.20192	7.05	24.75	4.5	3.64524	12.5	7.8	1.5	0	0	7.29167	4.01042
0	32.35	18.3571	4.85769	17.6	34.5	1.575	6.47619	5.84	8.025	5.78571	5	2.625	9.625	4.57188
0	45	22	10.3846	0	0	0	12.9524	5.75	3.75	0	6.25	0	2.5	1.25
0	44.45	11.4286	29.0865	26.6	21	2.1	18.6905	29	11.7	16.3571	5	5.25	10.4167	3.33333
0	34.7	18.0286	13.2692	37	43.125	8.25	20.5685	14.05	20	13.8571	3.125	3.41667	22	2.13125
0	60.42	13.6429	8.17308	7.61	0	0.8	14.9048	7.38	2.1	4	1.75	0.583333	30.7083	4.32708
0	19.9	9.17857	10.435	8.66	9.225	0	15.1995	6.65	19.95	0	0	2.39167	3.625	1.30313
0	45.8	24.2857	11.5721	37	12	16.875	18.3869	21.35	6.23	7.5	5	0	17.5	5.65833
0	32.9	25.7143	15.5577	14.8	12	4.5	17.7976	23.7	49.8	7.5	5	2.04167	8.4375	3.4875
0	44.1	8.1	16.2513	5.56	14.4	0	18.816	8.346	5.735	3	1.7	0.816667	12	3.14167
0	47.2	4.96429	16.7808	9.75	1.05	0	19.1357	2	0	3	0	0	12.5	1.72917
0	30.8	25.7143	12.7212	37	12	1.575	17.4238	18.3	7	3	3.25	1.69167	10.3125	2.2
0	33.5	13.7429	11.8077	10.085	27.75	0	19.1798	3.36	2.89	3	1.6125	1.75	14.7917	5.55208
0	45.3	19.8143	9.95615	15.665	40.5	0	17.9198	10.996	12.695	4.5	1.35	1.4	14.5	3.80833
0	36.5	26.4286	12.9856	37	30	1.575	16.4	6.7	17.7	7.5	1.4	0	13.75	3.25
0	36.5	25	19.2779	37	12	1	15.1286	5.5	27.7	3	0	0	10	4.5
0	30.2	13.7	9.58885	9.29	31.5	0	19.985	3.59	6.05	2	2.2625	1.225	12.75	2.54375
0	54.05	6.59286	10.6888	10.84	38.25	0	18.8544	4.48	24.25	3.5	2.5	6.7	11.6667	3.4375
0	42.9	7.14286	14.3077	15.3	48.3	0	8.81429	9.63	15.25	15.7143	2.5	2.54167	10.9375	5
0	48.7	23.2143	20.5346	10.83	52.5	1.33	21.6395	7.18	14.45	4	21.5	5.25	10.625	5.10417
0	57.7	15.9286	19.4385	15.4	29.1	5.225	15.8357	13.875	14.525	3	5.375	9.75	11	11.6875
0	35.3	12.7143	7.41346	1.96	43.5	0	16.3452	11.65	19.225	5.78571	3	36.5	7.29167	3.125
0	45	14.4286	6.65385	3	22.5	0	13.9762	2	4.8	1.5	0	6.25	6.875	2.85312
0	45	11.2857	6.16154	11.9	21.3	0	13.4333	7.48	4.45	1.5	4.125	1.51667	19.25	4.33125
0	48.42	5.10714	14.0385	6	0	4.1	15.4929	11.2	0	0	4.625	0.583333	9.625	4.46875
0	32.8	9.42857	8.67308	4.8	19.2	4.5	12.3571	7.48	9	1.5	7.5	2.83333	8.5	3.11667
0	35	5.79286	3.8	1.89	59.55	1.5	16.311	16.6	9.1	2.5	1	0.583333	20.8333	8.125
0	23.42	33.9286	22.8173	16	18	21	16.3762	35.61	14.35	22.8571	9.375	1.16667	25	6.08333
0	46.2	49.6429	14.8077	59	0	0	34.7143	9.95	13.25	4.28571	5.125	0	17.5	8.4375
0	43.56	19.6714	16.125	9.67	60	0	8.81619	11.48	34.6	6.5	0	2.91667	10	4
0	27.5	9.28571	6.59231	0	41.25	2.5	6.66667	1.5	0.525	1.5	0.875	0	5.775	2.3375
0	55	11.4286	7.99038	16.2	12	2	9.20238	6.95	5.325	4.35714	7.125	7.33333	21.6667	6.91667
0	30.35	9.78571	3.65385	2.42	0	0	8.57619	2.05	1.5	0.5	1.25	1.75	5.20833	2.23958
0	47.73	13.8571	18.7885	34.47	24.6	1.3125	10.3952	13.59	14.95	11.7143	5.875	13.3333	12.375	3.025
0	48.28	10	6	12	8.7	0	10.7321	1.74	1.5	0	16.25	0	6.25	3.48958
0	30	6.67857	4.10769	13	4.5	0.35	7.19048	0.49	0.525	5	15.625	0	6.35417	3.39583
0	31.6	18.6429	7.47692	16.4	15.6	0.7	16.2524	9.75	5.5	7.5	3.125	2.33333	21.25	5.10417
0	56.55	23.5857	13.9923	10.26	30	2.275	27.9286	15.09	2.45	3.5	1.75	1.16667	16.6667	6.19792
0	34.8	5.38571	12.4808	25.4	43.35	1	16.1452	10.55	21.05	3.5	6.3125	2.58333	7.8125	6.5625
0	64.25	13.2643	11.0135	20.6	18.6	1.4	18.8857	13.51	13.8	9.5	8.8125	10.5	16.6667	6.66667
0	30	7.07857	11.6154	5.12	11.25	1.25	17.8452	6.45	4.575	1	1.6875	5.58333	31.25	7.5
0	49.45	13.3714	9.5	7.78	13.41	3.2	9.58333	23.34	11.94	23.4286	13.375	2.91667	8.75	10.625
0	0	0	0	0	0	0	0	0	0	0	0	0	0	0
0	0	0	0	0	0	0	0	0	0	0	0	0	0	0
0	32.7	9.18571	11.6692	5	24.75	0	6.14524	4.65	2.59	4.78571	4	5.58333	8.33333	3.54167
0	35	2.28571	1.11538	0	0	0	2.73571	2.85	26.8	0	0	0.583333	23.3333	1.60417
0	37.15	24.15	24.4423	54.3	13.5	6	27.9105	14.26	8.44	2.5	2.4375	6.83333	12.5	4.875
0	33.2	8.10714	2.14038	4.735	20.55	0	7.24405	4.45	0.49	1.25	0.4375	0.991667	13.75	5.46875
0	44	52.1071	23.9423	26.2	15.75	0	22.1143	12.5	31.6	24.8571	2	2.91667	11.6667	2.875
0	24.75	36.2143	19.3692	0	76.5	0	14.8333	11.28	29.75	11.0714	2.375	2.83333	19.1667	4.08333
0	26.2	15.8571	28.7308	22	61.5	2.5	19.1905	3.4	41.1	4.28571	6.875	1.75	9.53125	3.72396
0	0	0	0	0	0	0	0	0	0	0	0	0	0	0
0	62.65	27.8571	7.5	14.8	0	0	16.2619	7.6	0.49	0	1.75	0	8.525	1.14583
0	52.65	26.4286	6.89423	14.8	12	4.5	13.8571	5.8	3.5	0	5	0	12.0417	4.4625
0	27.8	10.7143	6.19231	11	0	4.5	11.3686	12.75	22.1	4.5	0	1.28333	19.3125	3.5625
0	46.47	24.8143	19.1269	30.8	4.5	0	22.2631	3.246	2.75	2	3.75	0	10.575	3.21375
0	49.6	30.3571	11.6538	13.5	12	0	20.3643	19	1.4	0	7	0	11.9792	0.885417
0	25.5	18.8571	7.06731	13.8	4.2	0	13.481	12.705	14.34	4.5	5	2.15833	11.4125	3.23125
0	19.2	9.07143	19.0904	14.8	4.05	6.75	8.51905	7.05	9.1	0	0.175	1.575	5.625	2.25
0	39.2	11	8.13077	14.8	12	2.875	12.4643	36.85	20.97	23.9286	1.75	1.69167	13.125	2.4375
0	37	26	7.68846	23.8	0	5	17.85	3.8	1.4	2.14286	5	0	15.5	4.5
0	27.9	10.7143	4.80769	14.8	4.2	0	11.8738	16.95	3.15	6	0	1.575	8.9375	2.81875
0	45.42	17.1714	6.12885	20.6	4.5	0	12.6626	3.8	0	2	4.5	0	21.4583	4.16667
0	78.5	34.6429	12.2058	14.8	12	0	22.2976	17.75	1.75	15	2.625	0	23.0208	7.17708
0	55	14.7857	15.6923	44.6	14.4	2	23.5452	2.4	0.525	0	3.75	0	8.75	4.25
0	32	19.0714	15.0769	43.76	12.15	0	29.1262	7.7	9.25	5	2.75	0	6.66667	1.16667
0	18.2	18.7929	30.6538	4.9	0	5.15	18.4429	14.65	30.3	16.1429	2.5	3.5	18.75	7.08333
0	27.1	13.6714	34.25	22.31	0	9.5	24.9726	7.25	32.05	7.5	1	10.5833	5	2.4375
0	31.7	25.9	24.5865	50.86	14.4	4.8	27.6529	17.85	8.025	8.21429	2.75	1.75	17.5	4.70875
0	79.25	22.9286	16.5096	36.24	6.75	0.49	21.7119	3	3.675	2.5	4.25	0	11.6667	1.375
0	45	13.1786	20.6538	6.96	0	17.5	30.3952	10.7	21.5	8.64286	0	4.75	16.6667	9.25
0	16.05	29.5714	24.5096	7.54	3.6	0.5	22.1357	6.45	6.975	15.8571	22.5	6.16667	6.66667	3.08333
0	32.34	13.9643	9.23077	33.06	26.1	4.865	28.1679	5.78	3.25	8.57143	1.35	2.83333	15	9.7625
0	56.34	18.25	21.9423	30.66	0	0	27.5393	9	5.5	8	0	0.583333	13.75	2.25
0	43.19	7.94286	35.6731	11.54	33	12.375	29.6157	2.35	28.15	1.25	3.025	7.33333	8.25	3.875
0	51.35	10.0429	11.6981	9.04	13.65	7.5	23.4224	7.15	4.615	3	1.5	0.583333	10.3333	4.61667
0	36.49	4.71429	25.6827	12.42	21.15	15.025	21.319	7.5	12.205	2.5	1.8875	4	11.7333	5.06667
0	24.9	10.1571	5.34231	8.76	4.5	0	21.8752	3.45	4.615	4.5	2.25	0.525	15	3.86667
0	29.5	5.07143	12.0096	5.44	11.55	0.8	13.0369	2.3	12.29	5.78571	2.5	6.16667	10.75	6.5
0	73.05	6.2	9.05769	15.7	31.5	7.25	26.5524	4.45	4.515	4.5	9.375	0	15	4.03125
0	60.84	9.8	7.73077	10.84	3.15	1.6	26.055	2.105	1.4	0	0.875	0.583333	15	3.58333
0	17.05	4.32857	16.1269	6.86	13.35	0.6125	10.5962	5.89	17.49	3.85714	3.375	3.24167	10.8333	6.71875
0	37.7	4.14286	11.5192	11.2	0	3.7	20.2917	6.1	2.59	2.5	2.875	4.15	17.2917	7.8125
0	15.94	4.66429	18.9904	16.84	9	0.8	13.3638	8	29.49	3.42857	3.375	17.25	4.25	3.56667
0	37	8.14286	18.4615	3.24	6.75	3.275	19.5381	3.325	5.44	5	4.875	0.583333	28.75	3.5
0	45.35	5.58571	12.5577	8.6	14.55	2.875	19.0626	6.425	10.36	2	2.125	0.583333	17.5	8.25
0	19.925	16.9714	28.0042	16.79	25.5	0	33.8069	11.512	4.74	4.5	2.35	2.04167	8.33333	3.46875
0	49.8	26	7.23077	34	12	0	16.3905	10.4	1.4	0	5	0	11.4583	2.52083
0	53.3	26.4286	13.4615	37	12	2.3625	17.7119	31	5.6	15	5	0	6.27083	2.69792
0	32.28	27.1429	13.9	37	12	0	16.5762	22.375	22.1	0	3	1.45833	9.41667	2.16667
0	51.2	9.4	12.5735	18.6	0	0	22.8167	5	3.235	0	7.5	0	12.8125	6.46875
0	54.6	26.7857	11.3846	14.8	12	0	15.6405	33.45	30.5	15	0	0	23.9583	7.08333
0	28.7	26	13.2365	37	48	7.5	16.1	12.25	29.59	2.25	3	4.75	9.25833	1.74167
0	24.8	26	9.46154	18.8	12	0	15.0964	9.675	0	3	0	0	17.5	8.0625
0	31.5	19.4643	10.8846	33.5	30	7.5	16.0333	4.2	5.6	0	5	0	3.66667	1.5125
0	47	11.9	7.93462	23.7	24.075	0	22.5619	2.66	2.89	0	4.025	1.16667	8.25	2.21875
0	36.425	7.29286	12.5385	14.41	45	0.28	27.5986	9.2	5.3	3	0	1.86667	6.75	3.8375
0	41.68	5.52714	6.21154	8.27	0	0	14.1201	5.05	31.05	2.5	0.9625	1.225	15.3333	2.39167
0	39.5	25.25	4.53846	14.8	0	0	14.3429	13.2	1.4	0	0	0	11.875	2.85
0	28.75	10.25	10.5769	14.8	30	4.5	14.1976	11.3	27.7	4.5	4	1.34167	12.4	4.13333
0	27.9	8.6	5.52115	14.8	30	3.65	8.90476	9.29	7.5	4.5	4	1.45833	13.2292	1.92708
0	42.1	24.6429	14.2808	29.21	9	0.49	30.6106	7.75	9.35	4	11.25	5.08333	14.1667	3.375
0	17.525	5.67857	9.37981	14.8	12	4.5	5.42381	8.3	18.1	3	0.9625	1.05	10.4167	2.03125
0	21.8	8.92857	3.50481	14.8	0	0	8.5881	10.4	3.5	7.5	5	1.4	8.75	2.5
0	39.5	25.7143	9.05577	15.8	30	1.575	16.4167	12.005	4.9	12.8571	5	1.575	6.25	1.1
0	37.8	11	6.97885	13.5	30	0	13.4452	8.3	3.57	21.4286	5	0	6.91667	1.29167
0	23.5	11.2857	13.6731	13.5	12	0	6.67857	15.4	22.09	17.9286	5	4.14167	10.5208	1.875
0	0	0	0	0	0	0	0	0	0	0	0	0	0	0
0	32.95	26.2857	12.7308	29.8	30	4.5	15.4286	23.6	10.5	10.5	5	2.04167	9.20833	2.90417
0	40.8	22.3571	14.0673	14.8	4.2	0	15.5071	22.33	11.9	13.8571	5	1.69167	27.5	4.35417
0	42.9	23.0714	11.0769	14.8	30	7.5	18.4833	21.1	20.57	21.4286	1.4	1.69167	6.5625	2.7125
0	40	21.6429	3.97308	13.7	0	0	20.6064	13.595	34.8	0	1.5	1.80833	15.625	4.89583
0	32.1	23.2143	6.15385	14.8	12	1.575	12.2381	10.6	4.55	1	1.8875	0	16.5	2.6875
0	7.82	12.1714	2.36231	10	7.5	22.5	15.8148	5.165	5.9	0	11.25	2.36667	16.6667	1.79167
0	45.1	21.1143	12.7654	19.68	0	8.5	23.921	9.565	30.93	14.2857	5.625	4.66667	15	4.75
0	32.8	26	4.26923	14.8	12	0	15.9595	12.25	1.4	0	4	0	17.5	3.75
0	31.2	10.7143	6.61538	14.8	6.15	0	7.52619	25.3	49.1	8.5	1.75	1.575	30.4167	5.41667
0	16.8	26.85	13.6654	44	25.125	0	17.2595	6.75	10	0	1.5	0	9.91667	2.7625
0	17	20.8457	18.7038	7.36	0	0	28.2988	2.7	37	0	0.525	0.991667	18.3333	4.28333
0	21.5	9.57143	5.14231	14.3	4.2	4.5	6.77869	14.85	17.07	11.25	0	1.45833	12.4	2.3
0	34.8	10.7143	4.61538	14.8	0	0	8.25238	15.3	2.1	17.1429	1.4	1.16667	11.7583	4.0375
0	0	0	0	0	0	0	0	0	0	0	0	0	0	0
0	32.9	25.7143	15.9279	32.8	30	8.4	14.2333	16.6	17.7	12.8571	3.1875	1.05	11.7708	2.39583
0	36.8	15.5357	7.73077	7.4	0	0	6.11667	6.05	3.1	3	0	1.05	11.6667	1.91667
0	37.5	24.2857	7.47308	15.2	30	6.3	15.5905	24.15	8.89	4.5	0	0.291667	14	1.61875
0	16.225	17.7857	25.0115	4.99	4.5	1.575	13.3732	4.41	0	0	10.5	1.575	14	2.65625
0	0	0	0	0	0	0	0	0	0	0	0	0	0	0
0	30.84	16.0643	7.22308	10	20.25	0.175	13.6836	10.446	33.4	7.14286	1.275	2.15833	18.3333	2.64167
0	38.2	15.5857	4.37692	14	13.5	0	7.06512	13.85	2.1	7.14286	0	0	14.1667	1.975
0	46.9	26.5286	8.20385	45.84	11.25	0	19.95	7	3.85	3	4.1125	0	7.08333	0.899583
0	55.5	35.7857	4.53846	52	12	0	26.4524	14	3.5	0	1.75	0	12.5	3.75
0	55.2	26.4286	7.02885	14.8	4.2	0	13.5833	34.6	32.6	36	1.75	2.275	29.25	5.125
0	0	0	0	0	0	0	0	0	0	0	0	0	0	0
0	25.85	16.2029	0.242308	9.14	22.5	3.65	14.7755	11.5	39.59	8.57143	0	0	16.25	4.2
0	40	29.3443	20.7692	14.4	0	0	7.41524	15.56	3.5	0	7.5	0	9.58333	2.375
0	38.12	7.75714	3.28462	11.3	12	0	10.2274	7.56	27	0	5.625	0.816667	7.1875	1.95021
0	56.6	26	13.2692	40.8	15	0	21.3714	47.55	10.45	31.4286	8.5	2.04167	13.1292	2.06042
0	30.96	13.3571	2.97308	4.8	0	0	14.4774	7.32	1.4	0	0	0	7.58333	2.7625
0	44.4	31.7857	15.55	27.6	4.725	0	14.5245	9.455	9.1	1	7.5	1.16667	16.875	3.05
0	24.8	18.6786	3.94231	26.15	0	0	11.2071	6.45	0	0	2.75	0	7.875	1.6875
0	41.2	21.8571	7.17692	7.145	0	0	15.5643	8.7	31.83	22.9286	5	2.04167	6.83333	2.25
0	19.35	10.2071	5.82308	10.51	12	0	7.37619	4.95	20.7	2	2.5	0.875	5.95833	2.78958
0	31.4	4.85714	3.43462	10	0	0	12.3279	5.895	31.65	10.0714	0	0	8.33333	3.36667
0	41.2	22.7857	7.11538	7.8	12	0	15.9262	4.7	0.49	0	0	0	8.5	0.95625
0	35.28	14.3929	5.27885	24.8	12	0	10.3917	10.75	1.4	0	3.6875	0	16.7292	1.94792
0	36.7	3.86429	3.40385	18.92	0	0	13.0033	7.145	12	3.7	0.7875	1.75	12.5	2.86458
0	35.96	15.4214	3.62308	17.8	14.4	0	12.0252	11.5	0.49	0	1.5	0	10.4167	2.29167
0	30.6	27.1429	6.15385	14.8	0	0	15.5536	21.8	7.175	4.5	0.9625	1.69167	10	1.33333
0	0	0	0	0	0	0	0	0	0	0	0	0	0	0
0	60	41.4286	13.6923	22	12	0	18.131	3.2	1.4	0	0.75	0	8.25	2.95625
0	23.3	13.8214	6.65577	19.3	43.125	0	8.20238	12.25	4.9	6	0.2625	0.291667	10	6.08333
0	33.2	16.7786	55.6731	12.1	4.5	1.4	28.4238	4.55	33	1.5	0	0	10	2.1
0	33.5	21.2857	13.6808	36.94	55.05	0	31.2012	20	6.09	14.5	2	1.4	20.9583	7.70833
0	68.7	11.4286	9.44038	13.5	30	4.5	9.29762	37.4	29.8	23.4	1.575	4.14167	16.625	4.0625
0	38.8	21.4286	6.96154	14.8	12	0	13.0369	11.42	2.8	10.5	4.0125	0	10.3583	1.925
0	0	0	0	0	0	0	0	0	0	0	0	0	0	0
0	38	19.9	23.25	17.4	81.3	0	30.5181	23.05	35.84	17.2143	7.5	2.975	12.5	4.58333
0	61.82	26.9886	15.3538	28.48	48	4.5	22.671	6.741	2.8	1.5	0.7875	1.225	22.6042	4.73958
0	44.5	10.0429	7.51154	15.52	0	0	12.7771	5.05	4.9	3	3.75	0	9.33333	2.96667
0	30.8	19.2143	6.96154	8.25	12	0.7875	11.3905	15.2	23.5	4.5	4	1.05	13.75	2.63542
0	34	18.9286	5.21154	9.5	25.125	0	14.5476	20.05	18.1	0	1.575	1.4	18.75	3.95833
0	26.65	23.1786	7.75	20.125	33.375	0	14.7905	19.8	30.08	4.5	3.0375	0.933333	7.875	1.78125
0	33.28	25	6.36923	27.2	0	4.5	11.6429	13	27	4.2	0	1.16667	12.5	2.60417
0	45.8	18.5	13.2981	9	6	0	18.9286	53.5	33.5	27.2143	0	17.7167	30.2083	4.79167
0	20.85	16.1429	6.25	18	29.625	0.875	9.78095	10.4	28.4	4.2	0.525	1.225	41.875	6.35417
0	67.78	9.15714	6.75	10.86	3.6	0	15.411	8.3	3.99	3.5	3.75	0	13.3333	3.66667
0	35.35	6.42857	7.85769	7.6	48	0.49	9.39905	9.06	27	27.2143	0	0	4.66667	1.86667
0	14.33	8.46429	13.9462	7.08	57.9	0	14.4083	6.491	2.45	0	0.525	2.33333	9.58333	2.29167
0	55.5	31.8571	12.2692	7.78	12	0	17.8083	20.2	4.9	0	4	0	11.8333	2.41667
0	19.8	23.5714	4.7	5.175	2.1	1.6	12.4119	9.03	28.4	5.5	1.3125	0.933333	13.5	4.66667
0	31.015	22	11.0308	21.86	40.575	1	17.9386	11.05	33.05	5.71429	0	2.975	10	5.53333
0	27.2	9.66429	15.6192	9.525	0	0	17.3976	10.8	3.5	0	1.425	0	10.3417	3.89583
0	24.3	23.2143	25.4231	13.34	20.25	0	14.8181	5.65	8.85	9	0.75	1.16667	7.60417	2.39583
0	76.15	13.2143	12.4577	27.6	4.5	0	27.8833	4.26	10	0	8.25	0	16.25	8.78854
0	28.5	6.24571	12.5769	10.96	18	0	10.0174	5.7	7.8	4	0.7875	1.98333	18.75	6
0	53.2	3.93571	4.88462	3.045	0.45	3.6125	20.0345	9.5	6.49	2	1.0125	0.933333	6.25	3.77083
0	47.1	22.4857	14.0462	42.8	43.5	0	23.3143	12.3	3.15	3	4.9875	1.4	16.7708	4.22917
0	50.45	17.6857	10.9346	19.84	22.5	0	15.8115	4	15	0	0	0	29.1667	4.95833
0	33.8	12.1893	5.56923	14	0	0	8.59	7.345	27.1	14.2857	0	0.408333	12.5	3.38542
0	14.2	20.2214	7.04808	24.84	10.5	5.3	14.2867	6.32	4.05	4.5	1.2625	0.525	7	2.6
0	22.12	15.9571	9.87	13.94	14.55	0	16.796	3.7	28.4	4.2	1.525	1.63333	14.1667	4.08333
0	47.28	7.80714	11.7038	20.1	13.5	0	16.9252	9.046	2.1	4.5	3.75	0.816667	6.25	3.54167
0	55	23.2143	13.4346	11.2	4.725	2	17.669	25.48	5.6	7.14286	7.5	0.583333	10	1.25
0	57.1	33.1071	18.6087	8.3	12	0	21.0595	6.48	1.4	1	3.25	1.75	11.4375	1.09375
0	0	0	0	0	0	0	0	0	0	0	0	0	0	0
0	62.45	25.8857	7.78077	6.98	13.5	0	11.9555	11.575	3.85	2.5	1.5	1.75	13.75	4
0	52.3	31.3214	7.55769	22.8	33.75	1.505	14.8071	10.8	3.5	0	3.5	0	12.5	1.625
0	51.715	25.4286	7.86154	14.8	0	0	15.1827	12.1	4.2	0	1.3125	0	10.25	2.5
0	44.135	21.8214	10.0962	25.3	0	1.575	18.2167	26.5	7	21.4286	3.25	0.7	10	1.75
0	26.5	13.7143	4.80769	19.86	15.45	0	11.2074	9.06	2.05	0	0.7875	1.63333	17.5	3.125
0	51	18.6429	8.30769	36.6	33.75	0	12.2027	23.45	4.55	9.5	0.2625	0.583333	23.3333	5.36667
0	25.64	5.81429	7.00769	7.6	10.65	0	13.9619	3.5	8.5	20	0	0	15.3333	1.5
0	33.7	19.5	10.775	9.6	22.5	0	14.0231	5.38	27.065	2	0.875	4.58333	19.1667	5.475
0	45.7	22.2143	11.1654	44	0	0	20.4238	2.5	1.4	0	3.75	0	6.25	2.1875
1	33.8	11.4586	10.8385	9.6	0	0	18.8629	2.996	0	0	1.1375	0	10.3333	2.55
1	34.55	26.4286	17.3558	26.8	12	1.575	16.4024	15.225	30.5	12.8571	5	2.04167	23.9583	7.29167
1	27.2	10.9886	19.6577	8.36	6.075	0	16.5114	6.58	11.79	3.2	0.35	1.75	15.5	5
1	0	0	0	0	0	0	0	0	0	0	0	0	0	0
1	28.3	26	21.9231	26	12	4.3125	16.7643	4.2	12.49	6	4.25	0	15	7.1875
1	26.8	12.2	10.8385	3.78	13.5	0	23.9386	8.571	15.39	2	0	2.33333	13.625	2.5625
1	22.9	12	27.6269	13.46	66	0	23.9836	5.65	7.8	11	0	1.16667	11.25	1.5
1	48.3	18.5429	6.96154	28.7	25.65	0	28.291	4.495	1	2	3.2	2.74167	11.9583	4.73958
1	34	7.5	9.62692	10.42	18	0	24.2457	5.7	11.75	1.5	0	3.41667	23.5	6.375
1	52.2	13.1571	10.5692	19.55	7.5	0.7	21.419	7.368	4.745	3	1	2.33333	15	3.6875
1	27.8	16.1857	9.22442	16.79	13.5	0	18.7238	10.346	8.4	2	3.6	2.75	20.3333	3.38333
1	28.6	18.2857	20.3769	23.1	0	2.5	23.1829	6	15.39	1.5	1.525	8.66667	11.2	5.3
1	52.4	21.4214	7.98077	14.8	4.2	0	14.5957	5.6	1.4	0	5.5	0	18.0208	2.39583
1	71.7	12.6571	9.23077	23.44	0	0	19.2219	22.84	15	5.5	0	1.75	11.25	4.125
1	34	7.62143	20.7692	14.84	0	0	19.4043	8.75	16.35	4	0.7	1.75	13.6667	5
1	0	0	0	0	0	0	0	0	0	0	0	0	0	0
1	0	0	0	0	0	0	0	0	0	0	0	0	0	0
1	25.85	8.45	22.8	23.4	0	0	18.6424	6.806	10.39	4.5	0	1.75	18	4.45
1	31.85	12.05	19.8615	19.6	23.25	0	13.4714	5.43	8.5	3	0.525	2.33333	25.6667	5.84375
1	32.8	26.4286	9.76923	37	0	0	16.0048	8	4.9	0	7	0	9.625	3.09375
1	16.38	17.5571	22.6462	23.46	74.25	0	17.6088	1.85	26.58	3	1.8625	2.91667	51.25	5
1	25.7	26.5	9.34615	34.3	0	0.625	14.9119	10.8	15.79	1.5	0	2.33333	12.5	2.89583
1	26.525	23.1429	6.24038	8.8	9	0	14.5648	12.6	24.2	4.5	1.75	2.1	22.9167	6.66667
1	26.7	12.1429	15	14.8	0	4	13.4762	16.1	2.975	3	7	0.583333	13.125	1.8125
1	0	0	0	0	0	0	0	0	0	0	0	0	0	0
1	75	13.9286	9.42308	19.86	37.5	0.42	21.7793	17.8	34.1	8	0	3.5	8.39583	7.44792
1	42.9	24.2857	19.4808	14.8	4.2	2.5	14.5667	15.575	4.13	6.5	6.5	1.925	5.83333	3.0625
1	28.5	27.1429	25.3462	16.8	30	0	14.7786	13.35	2.1	2	5.6875	2.50833	21.3125	3.4375
1	45	14.6029	10.5154	36.8	0	1.2	17.7667	17	2.24	3	0	1.75	11	3.325
1	91.9	27.3571	17.5385	48	0	5	13.019	8.62	0	0	3	0	25.25	3.0625
1	45.8	3.57143	8.84615	10.36	58.5	0	23.9476	6.05	36	3.75	3	0	6.25	3.5
1	31.5	26	7.63846	22.5	6	2	15.1905	6.45	6.85	3	3.75	0	5.625	4.73438
1	33.6	25.35	10.9788	34	9.3	0	15.3238	2.8	3.5	0	7	1.225	7.5	1.97917
1	56.8	13.3571	27.9712	15.9	41.25	0	21.469	16.25	9.1	0	1.5	1.75	17.5	6.85417
1	32.8	26.4286	13.4471	37	30	0	15.7333	5.6	4.2	0	7	0	6.875	3.025
1	31.5	23.8571	15.1538	37	0.7875	1.05	13.7155	1.855	26.3	2	5	1.63333	8.13333	2.13333
1	24.82	7.9	15.5981	25.3	10.5	0	17.684	1.2	1.19	0.5	2.35	2.33333	21.0417	3.54167
1	22.98	6.79286	8.89615	13.96	5.775	0	24.9571	4.2	3.19	4.5	2.35	0	16.6667	2.3
1	15.68	7.99429	6.175	8.4	11.1	0	17.2986	5.5	9.9	1.5	0.5	2.33333	12.5	2.42708
1	21.5	1.32143	6.26923	1.75	4.5	0	12.8224	6.9	31.3	0	2.4625	1.75	15	4.30833
1	26.25	6.31429	4.76923	11.1	36.75	0	17.9714	5.95	34.99	6.71429	0	5.7	6.6	2.4975
1	75.09	5.95714	5.74231	3.6	66	0	30.7543	11.25	3.5	0	3.25	0	7.75	3.1875
1	0	0	0	0	0	0	0	0	0	0	0	0	0	0
1	32.8	8.4	11.9	14.3	3.15	0.875	18.9364	3.36	1.89	1.5	0.7	2.91667	9.47917	1.84896
1	32	7.14286	0.692308	0.252	1.05	0	6.06667	8.05	0.49	0	3	0	5.83333	1.53125
1	46.15	9.74429	9.85769	13.96	54.75	0	18.7948	5.3	4.48	1.5	1.875	0	9.1125	3.9375
1	49.6	26.4286	8.30769	37	6	0	15.1393	4.2	1.89	0	5	0	7.875	2.8125
1	48.2	18.0286	22.3692	35.4	9.15	0	16.235	3.5	2.38	3	1.35	0	18.3333	5.91667
1	58	39.5857	8	25	0	2.1	7.58333	12.5	7.49	5	18.75	0.583333	20.9375	19.4021
1	30.8	25.4036	5.46154	6.9	15.75	2	8.725	6.33	1.4	0	15.4375	0	11.6667	4.58333
1	34.95	16.2857	6.92308	7	9	1	13.7393	15.5	3.5	2.5	12.5	0.875	13.125	5.06771
1	39.41	12.8214	27	7.125	28.5	2.45	17.6236	9.24	18.59	9.5	5	4.08333	12.5	3.28125
1	0	0	0	0	0	0	0	0	0	0	0	0	0	0
1	23.06	9.17857	3.32308	6.04	39.9	18.25	8.20952	7.7	10.55	7.28571	8.75	5.08333	5.67708	4.01042
1	26.12	8.03571	4.07692	9.2	13.575	1.6	6.97619	5.63	3.25	3.67857	0	2.25	4.125	1.55925
1	12.25	3.12143	8.56731	4.15	6.6	0	8.83131	3.8	19.565	1.5	1.225	3.24167	8.41667	4.91667
1	22	6.04286	12.3288	5.5	10.05	1.4	14.7412	4.04	9.73	8.57143	4.2875	0.583333	17.875	4.0625
1	33.82	4.08571	5.86154	7.8	2.625	2	6.90595	19.55	3.4	3	1.4	1.16667	10.0417	2.41667
1	26.9	11.8	12.3442	17.73	10.65	5.4125	10.5631	14.025	9.75	10.9643	4.5	2.68333	7.8125	2.55208
1	0	0	0	0	0	0	0	0	0	0	0	0	0	0
1	0	0	0	0	0	0	0	0	0	0	0	0	0	0
1	46.28	8.71429	6.97115	5.04	15.6	9.5	12.3124	14.56	27.35	4.28571	0	0.816667	4.41667	1.59583
1	55.8	9.97857	10.8269	40.86	0	2	6.02619	5.4	1.4	0	2	0	8.83333	5.975
1	39.2	4.975	11.5385	20.01	10.725	2.5	14.406	4.61	8.19	4	0	2.33333	6.66667	2.975
1	29.405	14.6071	5.66923	11.6	10.65	1.4	8.70167	8.2	11.34	1.75	0	2.33333	6.875	1.40625
1	0	0	0	0	0	0	0	0	0	0	0	0	0	0
1	30	16.5	4.56731	7.2	22.8375	1.3125	8.91667	12.825	13.49	1	0	0	8.33333	1.39583
1	15.1	25	18.9154	37	22.05	5.4	15.7074	11.9	29.415	3	0.9625	1.98333	8.75	1.82292
1	41.68	26.4286	9.45192	9.25	6.15	9.6125	15.4762	16.2	17	3	1.575	1.75	5	2.16667
1	50.95	11.4286	10.6892	25.86	6.75	6.75	17.5931	11.91	7	4.5	2	1.16667	8.33333	4.65625
1	47	7.68571	8.68462	8.26	5.46	2.99	21.6652	1.015	1.4	0	4.1	0	6.66667	3.3
1	26.15	8.94643	5.95385	10.13	14.25	0.2	10.4065	8.6	4.05	1.28571	0	1.16667	12.5	5.20833
1	46.4	8.14643	4.28846	34.98	5.175	0.7	2.68214	5.86	8.2	0.285714	2.4375	0	6.5625	3.65625
1	31.18	8.42143	5.09038	6.004	15.975	2.175	8.43214	13.9	6.275	4.78571	1	4.41667	5	3.5
1	34.2	10.8214	9.55769	20.6	15.75	2.45	11.1667	11.5	0.725	0	6.25	0	4.16667	2.5
1	24.1	12.5429	15.4923	6.82	2.52	12	18.1869	26.425	9.1	5.42857	0	3.08333	17.25	5.60625
1	18.8	6.28571	6.16538	15.41	36.9	3.1125	16.2333	5.28	9.1	6.71429	0.25	5.58333	7.08333	2.8375
1	60.05	4.48571	12.6923	2.4	17.1	0	5.11667	2.82	22.54	2.7	0.175	1.925	16.875	3.4375
1	36.4	3.75	10.7308	6.68	24	2.5	10.4952	2.28	5	0	25	0	10.4167	1.14583
1	48.9	16.8286	10.2885	16.74	29.25	0.025	11.9571	13.4	7.89	0	0.875	0	8.125	4.33333
1	48	19.2143	15.5	11	0	6	6.07143	7.55	1.75	0	1.75	0.583333	9.625	6.6
1	68.28	24.7286	27.6721	10.4	69.075	2.525	5.34548	35.8	12.84	5.85714	3	4.025	8.33333	6.41667
1	30.7	17.6	19.8462	13.2	27	0	13.119	11.4	6.9	3	3.75	2.8	12.5	3.75
1	20.65	2.92857	1.56731	24.97	10.26	1	11.9762	10.18	36.35	3.5	0	2.04167	8.33333	1.97917
1	47.1	8.44286	4.50288	0.7	11.7	0.4375	1.94762	7.39	4.45	4	13.375	6.16667	13.75	3.09375
1	81.5	17.1286	18.5288	84.8	11.31	3.2	12.9	13.55	4.78	2.21429	31.75	0.75	10.4167	7.70833
1	42	36.4286	33.9615	18.3	56.25	2.575	19.1214	10.875	36.05	1.42857	6.25	14.5	2.91667	1.54583
1	50.2	14.3143	15.8077	11	3.15	0	4.7619	4.05	2	0	2.975	0	20.8333	4.11458
1	10.05	6.42857	6.52885	10	0	0	4.01524	21.03	23.7	35.7143	0	1.75	8.75	8.16667
1	25	14.2143	8.59615	52.14	35.325	12	5.26429	5.11	5.75	1.5	0.875	2.33333	3.125	2.3125
1	30.35	1.05	4.71538	16.04	32.25	3	7.38333	16.75	17.35	3	0	1.16667	5	1.1875
1	40.7	11.0571	10.2308	0	9.15	0	13.95	1.112	0.49	3	0.175	0	8.33333	2.16667
1	33.05	11.5714	8.50962	18.74	11.25	0	8.40714	7.33	4.6	1.5	2.9375	1.16667	5	1.1
1	36.1	4.90714	7.07692	9.18	49.5	8.85	10.8762	8.7	3.4	2.85714	4.5	2.25	25	6.125
1	27	23.5714	6.73077	212	0	0	13.0952	3	2.75	0	2.5	0	17.5	4.375
1	46.75	27.9286	12.2077	30	3.15	0	23.7952	10.56	7.9	2.5	0	0	9.16667	3.78125
1	40.35	4.32857	5.62981	3.64	9.9	0.7	4.68571	11.435	6.675	5.35714	3.75	2.91667	5.83333	2.5
1	28.33	6.08571	3.22885	3.36	11.25	0.28	3.92619	6.512	5.38	3.92857	0.875	0.933333	5.20833	1.5625
1	55.7	1.2	3.57692	0.84	1.575	0	7.09048	12.58	1.365	1	0.5	0	18.75	8.875
1	0	0	0	0	0	0	0	0	0	0	0	0	0	0
1	43	6.51429	1.77692	5.4	58.5	0.875	4.025	3	0	0	0.875	0	4.16667	0.833333
1	23.2	14.7857	10.9038	15.5	33.6	6.95	8.38095	12.38	13.05	0	5	2.58333	10.8333	10.8333
1	30.28	12.4286	14.5096	4.588	32.1	0.7	6.98905	2.87	6	0	0	2.54167	6.875	1.85625
1	60.8	31.1	14.1962	34.4	10.545	5	19.3857	10.6	6.685	9.14286	5	2.91667	27.5	9.5
1	15	12.4714	10.7077	31.18	3.375	0	13.9714	3.225	1.7	0	8.125	1.16667	10.75	4.8125
1	47.5	20.4286	2.67692	2.1	0	0	6.67857	2.1	0	0	0	0	11.4125	1.54688
1	32.28	8.89286	4.24423	8.18	9	0	12.1321	8.55	0.525	1.5	0.4375	0	9.58333	2.945
1	48.96	26.2857	13.0327	34.78	37.5	0	20.5524	10.84	4.125	2.5	11.8625	0	10	2.5
1	40	12.1	7.57692	24.3	0	14.375	9.1	13.6	9.775	5.78571	0.75	2.33333	13.5417	3.22917
1	32.3	5.71429	10.8173	5.34	0	6.95	13.5857	6.68	21.35	7.28571	8.125	0.583333	9.375	3.28125
1	44.14	12.2857	12.5	17.3	9	0	17.2238	6.4	0	0	0.35	0	11.1667	2.93125
1	45	22.5457	9.92308	10.68	3.3	0	11.4286	4.55	6.62	1.5	5.5	0	20.3333	4.25
1	0	0	0	0	0	0	0	0	0	0	0	0	0	0
1	68	12.8	4.30769	16	6.75	1.2	18.5536	4.56	2.5	2	3.75	1.33333	6.25	1.77083
1	20.1	11.3893	4.96154	5.71	21.78	2.425	3.72667	1.605	24.15	1	3.25	0.583333	7.8125	2.5
1	60.98	15.0286	3.68269	33.68	13.5	2	8.27857	11.8	3.13	3	7.625	3.5	18.75	5.0625
1	47.5	45.1429	16.4115	24.8	15.6	0.7	10.119	24.2	9.1	0	31.25	3.33333	11.6667	2.27083
1	0	0	0	0	0	0	0	0	0	0	0	0	0	0
1	43.85	6.02857	17.8365	22.14	0.7875	0	6.09286	12.5	12.1	6.35714	1.5	2.33333	11.4583	5.9375
1	32	19.2857	6.88462	17.8	12.6	3.2875	7.60714	2.8	5.5	0	10.625	0	10.5	1.375
1	32.4	6.94286	10.4038	8.04	13.5	1.25	6.16905	5.4	2.2	4	4.5	3.41667	8.3875	2.26875
1	23.7	10.0714	13.5577	11.8	13.5	2.05	7.10714	8.6	8.725	3.5	0	10	10	4.89583
1	36.05	12.0714	9.49038	19.2	9.7875	0.2625	10.2471	3.85	1.225	3	2.8875	2.33333	8.33333	3.95833
1	25.84	5.16429	2.38077	1.54	2.1	0	3.12262	3.55	6.2	0.5	0.4375	0	14.3333	3.86667
1	36	9.60714	6.25	9.71	11.835	2	6.25952	6.46	5.49	3	1.7	1.86667	8.75	2.25
1	40	6.58571	8.96154	2.1	4.5	0.7	11.0143	7.5	6.55	0	0	0.175	12.5	2.75
1	25.1	2.78571	4.61538	2.24	8.325	0.28	4.6381	5.75	3.68	3.42857	0.7	1.75	5	1.4375
1	0	0	0	0	0	0	0	0	0	0	0	0	0	0
1	29.2	19.3571	11.5962	30.4	0	1.4	14.6667	7.1	4.8	0	1.275	11.1667	13.75	2.4375
1	42.5	24.2143	19.4615	20.44	25.5	3.875	19.4762	17	4.325	2	1.875	6.16667	6.25	2
1	35.24	16.5214	12.3077	16.45	18.75	0	19.9381	8.5	14.55	12.7143	3.2375	13.5	14.125	3.75
1	33.15	33.2143	13.5481	34.86	8.1	2	22.4771	10.75	6.895	2	2.525	4.08333	12.5	7.125
1	28	14.8286	12.1154	8.15	0	0	24.3548	4.4	40.5	0	0.35	1.66667	15	6.625
1	43.75	29.1429	19.1538	9.16	32.25	1.325	26.3202	4.3	3.325	3.5	3.1125	4.5	13.5417	4.47917
1	50	20.2143	19.6154	27.1	3.15	0.21	19.9329	5.56	5.25	2.5	5.25	0	10.4167	4.5
1	29.05	19.1429	12.3077	33.6	21.15	5	31.3524	6.8	1.5	3	3.5	0.583333	11.6667	4.625
1	45.8	22.8714	21.4615	12.64	3.6	0.28	29.3081	5.8	4.125	5	3.35	4.5	15	6.75
1	36.2	7.64286	17.3077	18.1	10.05	0	16.9006	4.3	3.75	0	0.75	5.83333	5	1.625
1	55.8	15.1429	23.3269	37.44	12.6	5	25.5524	3.3	0	1.5	5.875	5	5.83333	2.66667
1	38	16.2857	18.8269	6.79	5.175	0.875	23.1619	14.7	21.175	12.6429	4.5625	7.33333	10.4167	5.23438
1	32	10.7143	7.50769	0	3.6	0	12.2143	0	0.7	1.5	5.525	0	2	0.775
1	40	16.2429	26.1538	27.2	69	0	11.3095	17	9	8.57143	2.5	2	14.5833	3.22917
1	45	59.0714	66.2212	51.5	75	0	29.9381	31.7	11.2	5	13.375	0	17.5	13.375
1	36	7.14286	5.37692	11.2	45	0	9.25	5	2.49	1.25	1.75	0	13.3333	1.75
1	32.4	2.3	7.96154	2.66	39.51	3.25	8.54286	16.25	19.55	4.28571	4.9875	3.125	18.3333	6.16667
1	58	32.6786	7.76923	16.8	14.1	0	6.57143	6.35	9.59	0.75	8.75	2.68333	4.58333	3.89583
1	32	18.1429	10	30.5	21	0	7.2381	3	0	4.28571	10	0	4.16667	4.27083
1	62.5	35.4286	27.4635	21.18	4.335	6.75	26.1155	8.5	4.2	0	1.3125	1.75	5.20833	3.95833
1	40.2	17.35	4.96923	5.04	43.65	15.7	4.09429	8.66	23.925	1.4	1.25	1.16667	13.75	5.375
1	22.5	9.28571	4.96154	10	60	0	3.54762	8	29	1	3.75	3.33333	5.5	1.99375
1	43.05	10.95	14.4962	12.31	57	3.7	15.9167	9.38	7.77	2.5	3.75	5.99167	7.5	4.125
1	71.95	24.75	11.5769	9.92	0	0.7	9.48988	14.9	9.94	2.5	1.25	3.5	1.66667	1.83333
1	38	16.9571	6.65385	17	12.15	4	9.55952	17.01	7.53	3	3.2875	0.583333	10	3.75
1	65.05	33.2857	24.9606	31.3	32.235	2.9625	13.2929	13.1	35.09	7	10.625	4.66667	16.6667	5.36458
1	14.4	20.0714	8.09615	12.5	8.385	1.75	26.0667	18.5	1.89	0	0	1.16667	8.33333	6.97917
1	73.2	21.2714	24.75	8.68	1.575	1.575	8.36667	8.8	7	0	11.375	6.25	5	10.1875
1	36.75	9.55714	11.6827	13.5	0	0.35	13.0619	4.9	3.2	0	10.125	2.83333	5.625	5.77688
1	85.1	80	10.3231	31.3	38.625	2.65	15.7452	9.8	15.3	10	9.1875	2.91667	17.5	9.1875
1	47	6.87143	7.29231	6	29.31	0.35	12.65	39.5	3.5	0	8.125	0	20.8333	2.8125
1	33.95	9.05	2.64904	5.72	28.26	11	3.54286	3.512	24.2	5.78571	0.6125	5.83333	5.41667	1.20833
1	49.75	17.4143	6.72404	8.7	18	2.275	8.99048	15.2	8.39	5	0	0	6.25	2.5625
1	44.4	15.1643	7.86538	8.94	13.575	1	6.15452	6.09	9.515	2	1.4	1.80833	15.4167	8.3125
1	32.8	21.8714	11.1923	3.72	6	1.2	12.1833	8.08	1.5	21.4286	0	0	13.75	3.25
1	49	53.7571	20.7	14.42	55.5	21.25	5.2881	18.04	35.72	1.71429	0.2625	13.35	13.125	2.75
1	30.7	58.4286	25.9038	40	51.51	0	10.8036	5.57	6.2	0	7.5	0.875	10.8333	9.6875
1	16.54	23.5714	7.40192	11.4	59.85	8.25	5.19405	9.63	52.4	0.15	1.25	3.66667	3.75	0.9375
1	44	5.89286	5.9375	4.5	3.6	2.45	3.76667	21.25	3.1	3.85714	2.7	1.63333	9.20833	0.975
1	65	65.7143	12.4981	1.68	15.75	10	13.1726	12.44	5.5	1.5	2.625	2.33333	5	1.8125
1	49	17.6286	43.6538	132	0	0.7	14.2714	12.78	5.5	5	1.75	0.583333	8.125	1.25
1	55.84	18.7143	11.1538	27.4	0	0.875	5.85238	4.7	2.5	0	18.75	0	5.20833	4.375
1	34	11.2143	4.43846	1.26	7.275	10.125	19.1738	5.7	25	10	8.125	0	5.20833	4.89583
1	45	21.4286	4.94231	10	3.6	1.225	6.29286	0.7	1.98	0	0	0	2.5	1.18125
1	63.7	10.3743	4.11538	1.89	2.835	0	6.04762	3.798	1.435	1	15	0.466667	6.25	3.4375
1	33.2	10.5286	8.75962	6.82	13.05	20.7	3.91667	7.47	20.5	2.97143	8.375	2.35833	9.16667	2.79167
1	37.2	46.7143	13.8846	24	28.875	0.7	8.09524	27.3	1.4	7.14286	0	4.5	4.375	2.73438
1	40	12.6857	14.6031	22.34	28.275	5.43	11.0315	31.65	7.24	3.7	0.35	6.66667	8.75	6.20833
1	42.85	3.20714	6.18846	15.56	35.01	0.7	4.26905	1.84	27.1	1	0.2625	2.1	14.1667	5.875
1	30	0.285714	13.8462	13	18.3	0.025	2.29762	5.5	2.11	1.71429	0.025	0	8.33333	1.75
1	32.7	16.6071	20.4423	32.94	0	0	15.2655	11.35	5.85	7.21429	2.5	3.91667	15.8333	4.47917
1	42.54	10.7857	16.3942	5.82	9.675	1	12.0524	8.45	28.9	7.21429	0.5	6.16667	23.0208	7.5
1	38.12	10.5714	8.42308	16.84	0	1	8.94048	4.92	2.4	0	2.25	5.93333	5.20833	2.70833
1	0	0	0	0	0	0	0	0	0	0	0	0	0	0
1	33.35	24.6429	13.2115	6.05	17.85	3	16.3019	14.93	13.9	2	0	18.5	6.5625	2.96875
1	0	0	0	0	0	0	0	0	0	0	0	0	0	0
1	24.5	6.07143	10.4231	3.36	33.15	4.75	17.1262	3.35	14.05	2.5	2.5	2.83333	10.625	2.08333
1	52.35	17.0714	12.2173	18.06	12	0.4725	15.2869	8.45	7.575	2	0.2625	0.583333	8.64583	2.44792
1	0	0	0	0	0	0	0	0	0	0	0	0	0	0
1	29.4	6.43571	5.92308	0	0	0	4.92857	7.5	0.385	1.42857	2.5	0	10	3.54167
1	46.55	50.6143	19.8077	23.96	11.25	2.4	23.9679	5.85	7.075	2	2.7625	7.91667	11.6667	4
1	24	44.2143	19.0923	42.86	36.75	1.8	24.925	5.75	8.275	17.8571	2.525	7.33333	13.3333	6.75
1	15	12.3571	9.23077	1.9	7.5	0	2.28571	8.35	7.85	0	5.625	2.25	12.6667	2.23333
1	33.35	9.28571	5.26923	5.9	8.625	0	7.7619	7.9	2.48	0	0.4375	0	12.5	6.25
1	38	2.46429	3.34615	7.6	54.75	0.0875	8.45238	11.6	4.975	3	13.75	0	7.5	1.91667
1	68.8	15.5	11.3846	24.7	9	2	10.3571	12	12.7	3	7.5	26.25	20.8333	5.72917
1	51.05	15.4286	12.6923	14.2	39.3	4	4.59524	8.1	6.05	3.5	9.375	0	6.875	3.1625
1	33.5	40.7143	12.2644	11.76	4.8	2.5	19.7298	7.59	7.3	5.71429	11.875	2.25	14	6.875
1	20	16	16.6346	24	30	0	25.5595	6.85	2.7	4.28571	5.8625	3.5	17	2.58333
1	0	0	0	0	0	0	0	0	0	0	0	0	0	0
1	0	0	0	0	0	0	0	0	0	0	0	0	0	0
1	45	18.7143	12.7692	16	12	3.05	11.7905	5.25	9	3	8.75	1.16667	6.66667	4.75
1	33	77.5714	44.6154	69	2.625	7.5	16.006	14.7	0.35	0.5	0	0.583333	7.75	6.5
1	30.05	8.83571	3.75577	12.512	9.675	0.7	5.52333	8.15	10.83	4.88571	1	6.575	18.3333	3.79167
1	50.5	26.0714	26.5058	23.5	69	2.1	26.7714	35.95	12.95	19.7857	19.625	7.95	2.0625	11.1375
1	34.4	29.2857	9.56154	48.85	24.075	0.7	8.73333	3.03	4.185	0	6.225	0.7	6.66667	3.04167
1	30.33	10.8	3.43846	2.81	26.76	10.35	5.07262	3.45	6.4	7.94286	7.5	2.30833	12.5	2.625
1	43.15	12.6429	9.23077	24.7	46.575	0	11.4286	24.5	0	5	0	0	11.4583	2.73438
1	36	18.3857	10.5769	17.8	95.25	14.45	6.24762	6	27.1	2.85714	1.25	2.33333	9.375	2.89062
1	33.2	31.3214	5.30769	50	8.1	0	9.90476	10	5	1.5	12.5	0	7.29167	3.30729
1	30	31.8571	34.0769	20	0	0	12.9476	13.7	38	2.85714	0.5	6.66667	6.66667	3.54167
1	35.4	4.78571	3.59615	28	0	0	3.86667	0	3.76	1.5	12.5	0	2.5	2.5
1	25	12.2143	3.67308	13.2	39	0	14.8571	18.7	1.9	1.5	11.5	0.466667	12.5	5.72917
1	27.5	22.6429	18.0577	15.5	48	13.5	12.2643	19.95	8.05	0	9.175	4.33333	4.27083	4.16667
1	0	0	0	0	0	0	0	0	0	0	0	0	0	0
1	30.42	17.1143	10	19	1.575	1.75	13.1548	11.6	32	3.5	3.375	4.08333	7.5	3.0375
1	38.7	16.0714	23.6154	19.43	11.1	0.875	12.6667	12.05	8.2	4.28571	4.875	1.9	8.31875	3.54062
1	30.875	25.7	7.65	10	0	0	19.7976	2.05	10.7	2.85714	7.675	0.291667	6.66667	1.32292
1	65	23.7143	4.34615	4.2	15.075	4	4.13571	37.1	4.115	2.25	7.65	8.18333	2	2.79167
1	65	31.6429	10.9885	75	16.5	2.175	10.869	8.05	3.29	5	20	1.16667	18.3333	3.375
1	21.2	0	6.29231	5.304	6.075	6	4.39762	3.1	1.6	1.5	3.25	0	5.5	2.0625
1	65	16.4286	34.6596	85.128	11.655	4.25	29.2857	11.3	10.025	5	22.125	1.13333	18.3333	5.33333
1	27.4	21.5886	6.2	14.34	33.3	0.23	9.24286	9.51	10.26	0	0.4	0.1	11.4583	2.13542
1	29.4	15.5657	18.5673	25	10.335	7.75	13.2524	16.125	14.55	1	4	2.6	4.16667	3.125
1	45.35	28	9.42308	51.1	23.1	0	9.33571	10.9	5.15	4	4.375	2.91667	11.4583	5.3125
1	63	21.0714	27.7923	20.9	0	10	27.9643	12.1	0	0	25	0	17.1875	3.23125
1	30.6	15.2429	6.64231	8.4	28.5375	2.5	9.97143	24.3	1.05	3.5	2.5	5	30	2.675
1	32.5	26.2857	15.0769	13.508	5.31	6.25	12.906	21.9	13.8	4.7	2.125	3.66667	28.75	8
1	66	6.07143	10.9404	10.26	31.5	0	15.2792	16	13.55	11.2857	0	5.16667	22.9167	6.5625
1	53	6.6	12.0385	0.84	7.41	0.2625	10.2595	6.25	8.45	4	2	10.0833	13.6458	5.15625
1	41.6	10.5714	32.3115	13.25	21	7.125	9.40417	3.375	35.575	4	0.4375	1.16667	14.5833	4.375
1	33.6	21.8571	2.85962	25.54	23.55	3.4625	14.9214	12.83	4.5	8.57143	5	6.41667	9.625	3.85
1	53.2	15.6429	7.03846	17	5.31	4	12.1357	15.5	6.5	0	1.75	0	5	6.5
1	52.05	19.7429	8.50192	42.5	20.31	0	14.5619	19.11	0	3.5	0.6125	1.4	18.8333	3.625
1	36.2	17.5714	6.11923	9.6	11.625	0	7.54524	11.75	12.85	9.28571	0	2.625	20.8333	4.79167
1	47	14.9	13.9731	35	0	0	17.3733	1.68	5.6	0	1.05	0	7.5	1.8375
1	42.87	4.12286	24.9365	11.84	25.05	1.925	15.0655	21.05	11.655	8.42857	1.5	2.91667	10.5	3.83333
1	30.98	27.1429	12.4279	14.8	0	3	16.1048	23.2	15.355	7.5	6	2.91667	12.5	4.375
1	42.8	22.4286	15	8.3	23.55	0	13.7707	4.675	0	0	4.25	0	5.20833	2.65625
1	45.98	6.97143	7.34615	7.08	3.15	0	12.2045	10	1.89	0	6.75	0	4.58333	1.66667
1	57.2	37.5	8.30769	35.1	36	0	19.7429	25.28	5.6	1	0	0	15	4.75
1	28.3	26.4286	22.4087	14.8	12	0	15.2643	16.1	6.79	4.5	5.8625	3.15	4.33333	1.35417
1	44.8	12.4	14.2154	19.44	41.25	3.15	20.1619	14	8.5	0.2	3.5	1.66667	10.0833	3.625
1	24.2	7.66429	6.47115	8.15	15.75	0.7	21.6921	4.97	16.98	2	1.05	2.33333	13.5	3.96667
1	45.8	29.9643	10.3404	19.125	18	0	9.66619	4.14	4.025	0	0	0	10	4.81667
1	40.2	4.97143	2.56923	5.04	0	0	5.80357	47.255	13.315	2.2	0	2.33333	25.625	8.8125
1	42.8	20.7571	17.2654	4.86	3.15	3.75	16.6926	17	5.74	7.5	0	5.25	16.25	6.5625
1	77.8	14.1857	9.06154	25	30	0.49	15.9048	10.55	2.555	0	0.875	3.5	8.54167	6.25
1	35.5	26.4286	10.0827	14.8	4.2	4.6625	13.2595	20.25	7.7	3	6.0375	0	4.16667	1.91667
1	37.2	21.9286	7.15692	7.1	3	0	15.3019	4.795	5.89	5	1.525	2.275	8.33333	2.625
1	52.5	14.8214	23.2192	8.44	16.5	0	26.0362	8.85	27.5	17.1429	2.35	4.08333	16.4792	4.73958
1	38	15.0429	11.7038	19.86	33.75	0	18.5212	1.75	26	5	1.7	6.56667	8.33333	4.975
1	25.91	21.5714	17.6538	15.5	0	0	15.2571	7.225	9.03	3	3	0	12.5	3.125
1	32.2	6.98571	14.2869	10.05	20.25	0	18.1412	5.005	5.3	1.5	1.525	1.80833	8.66667	3.03333
1	45.42	20.5	12.9654	7	9	0	18.7371	3.22	0.35	2.5	1.2625	2.04167	15.25	3.175
1	27.9	6.56571	12.0581	8.605	39	0	13.5179	6.75	4.15	2	1.2625	1.4	12.65	2.59187
1	56.05	6.86429	6.05769	21.6	33.75	0	14.9048	7.485	3.45	2	1.1375	1.4	43.3333	5.2
1	28.4	6.23571	7.65865	9.35	23.55	2.9375	12.8148	8.846	34.48	8.5	2.7125	1.575	14	2.9
1	39.8	26.2857	18.8077	37	12	0	15.95	9.25	3.5	4.5	3	1.45833	8.8	0.866667
1	35.8	26	20.2212	37	4.2	0.7	16.9643	12.35	6.58	6	0	1.575	7.15	2.54375
1	31.7	25.25	11.5385	29.8	12	0	15.4238	8.85	3.78	4.5	0	0	23	1.875
1	31.3	25.7143	9.69231	14.8	30	4.25	15.2452	7.35	3.5	4.5	0	0	15.5	4
1	59.5	23.5714	17.0192	29.8	10.05	0	16.6357	13.1	24.48	7.5	4.5	0.408333	10	6.375
1	45.15	26.4286	13.5288	29.8	30	1.575	16.3095	15.8	4.27	11.4286	4	1.63333	9.7125	1.4
1	47.28	8.15857	12.5115	38.4	11.25	0.49	17.9213	7.33	2.4	2	0.6125	0.408333	27.0833	2.36458
1	66	9.97143	10.7615	9.6	7.65	0	14.1988	9.36	10.8	2	1.0125	0	20.75	12.475
1	26.38	13.2857	14.0865	14.8	4.2	0	17.1262	18.8	25.04	14	5	2.04167	15.3125	3.64583
1	19.2	7.45714	3.95192	19.9	4.5	2.5	7.52881	3.621	3.05	0	2.5	1.575	8.1	1.13625
1	48.9	7.98857	7.72308	12.8	4.5	1.2	18.3579	6.88	5	2.5	2.6125	0.991667	15.3333	2.725
1	38.2	26	12.549	14.8	12	0	16.7512	21.4	31.9	4.5	6	1.45833	8.45	3.25
1	46.5	10.7571	7.46154	5	22.5	0	15.7214	2.5	3.55	4	2.2625	0	20.8333	3.39583
1	24.42	5.47857	8.08846	15.8	4.5	0	11.3821	6.636	6.4	6.5	2.6125	3.03333	17	2.91667
1	26.8	6.95714	8.69423	6.2	7.65	0	10.3869	7.26	6.8	4.5	1.85	2.075	16.625	3.13542
1	36.5	24.2857	10.9192	29.8	12	2.3625	16.7244	10.75	6.3	7.5	5	0	12.5	1.5
1	35.5	26.4286	14.5865	39.5	30	6.3	15.7024	23.7	16	3	5.5	0	5.25	1.375
1	30.8	25	11.1731	32.3	12	0	14.2655	10.3	0	0	5.5	0	20.8333	6.45833
1	61.5	35.5143	11.4346	9	0	0	17.4405	2.196	2.5	0	6.35	0	17.5	3.75
1	56.2	7.32857	11.9542	11.28	45	0	14.0083	2.446	0	3.5	2	0	16.5	2.28125
1	25.505	6.09143	15	9	52.5	0	14.4857	7.096	28.2	0	0.175	0.583333	18.25	6.45
1	29.3	15.0714	18.3846	11.84	17.25	0	16.2076	3.48	8.6	3	2.8625	1.225	16.3333	2.15833
1	22.68	5.75714	6.40385	12.5	10.05	0	7.96881	3.2	32.1	4	0	1.98333	10	2.3125
1	27.355	0.9	6.23077	3.815	1.575	0	9.98238	9.34	2.1	2.5	0.7	0	14.5833	4.79167
1	0	0	0	0	0	0	0	0	0	0	0	0	0	0
1	75.42	2.87143	6.94615	26	1.575	0	16.7457	5	7.5	1.5	0.525	0.816667	12.25	2.75
1	53.7	26.4286	13.8942	29.8	30	0	16.969	22.45	21.775	7.5	5	1.69167	14.4375	4.125
1	41	22.8571	4	20.8	4.2	0	11.8071	4.4	7.49	0	5.3625	0	5.83333	1.66667
1	22.7	4.67143	2.61538	14.24	5.1	0	4.64607	6.34	8.89	1.4	0.35	2.39167	8.33333	4.05833
1	43.1	27.1429	15.4769	18.38	12.6	2	11.6488	15.9	5.04	5.5	1.6625	1.98333	29.7917	7.51562
1	46.4	12.6357	7.24231	7.71	0	1.475	5.92798	17.55	12.375	9.57143	25	0.291667	5	4.64583
1	36.8	12.3929	22.5385	24.8	12	6.4	15.9695	15.525	25.88	3	1.8375	3.59167	11.25	3.70833
1	37.5	12.6714	3.96154	6.2	5.1	2.3625	13.4619	15.15	4.949	1.5	5.25	1.225	5.83333	1.625
1	24.4	5.57143	9.15385	3.24	52.5	0	13.5238	5.29	33	4.5	1.625	3.41667	17.9167	3.45833
1	0	0	0	0	0	0	0	0	0	0	0	0	0	0
1	46.2	17.4571	4.56154	7.64	7.2	1.75	6.76071	26.54	36.5	4	0.875	0.641667	8.75	1.625
1	32.8	27.1429	13.5923	12.8	12	5.5	15.5393	7.975	30.465	2.25	5.8625	2.33333	11.7708	2.11979
1	27.25	5.4	3.52788	13.04	14.55	0.525	7.9631	11.95	33.375	3	2.5	2.91667	6.25	5.5
1	31.9	9.81	9.5	10.08	7.5	0	11.206	24.15	7.7	10.1429	4.1875	2.58333	6.25	3.64583
1	0	0	0	0	0	0	0	0	0	0	0	0	0	0
1	37.92	8.06429	5.6	17.48	9	2.325	7.81667	8.7	4.15	3	2.9375	0	15	6.125
1	0	0	0	0	0	0	0	0	0	0	0	0	0	0
1	33.5	26.25	19.1202	25.5	60	3.675	15.6607	14.7	23.29	6.71429	5.25	2.74167	6.77083	2.65625
1	75.8	39.6429	15.4231	35.85	15.345	0	21.3143	21	1.4	4.5	9	0.583333	15.625	4.375
1	45.7	30.3571	11.3077	20.8	3	0.7	15.4429	15.75	2.87	4.5	2.975	1.51667	9.625	2.68125
1	39.03	7.95714	8.26154	12	45	3.3	15.925	5.7	21.18	0	0	1.16667	10.5625	3.90625
1	31.8	27.8571	19.6933	14.8	30	1.05	15.219	4.55	3.29	6.42857	7	2.275	12.5	1.79167
1	44.6	11.3429	10.7692	3.6	6.81	2.875	15.3667	5.92	0	0	16.25	0	7.425	5.61458
1	61.75	18.2857	10.6154	22.7	26.85	7.75	12.6214	8.05	18.55	1.5	1.25	6.75	10.8333	3.66667
1	38	15.9057	10.1385	21.68	4.875	3.75	19.1714	32	3.75	1.42857	12.5	5.83333	21.875	9.0625
1	38.3	0	10.0769	13.68	48.75	0	13.9405	8.8	9.6	3.5	2.75	4.5	20.625	3.1625
1	30	5	17.5154	7.26	6.75	4	9.70298	2	2.5	0	2.1375	0	8.25	2.54375
1	35	10.9286	25.9808	13	19.35	0	18.9399	5.85	4.95	6	2.75	0.583333	13.5417	5.625
1	36	16.0771	11.8846	15.28	12.3	2.5	13.1714	5.69	5.63	2.5	0	1.75	0	0
1	34	2.83071	11.7885	17.26	3.6	2.5	17.5952	1.75	1.5	0	0	0	10.625	3.90625
1	17.514	13.9286	18.4808	26.21	39	7.5	17.8643	7.6	3.1	11.6286	4.25	7.33333	13.5	3.67083
1	35.435	18.4286	34.75	24.52	31.5	10.25	29.7643	10	7.05	12.8571	5.625	12.8333	5.41667	2.70833
1	31	7.4	29.8269	7.72	14.4	2.5	18.856	4.4	13.575	4.5	1.525	7.83333	7.08333	4.04167
1	33	12.6286	25.7115	8.6	10.575	2.5	19.556	4.75	13.475	6.78571	2.375	10.9917	5.20833	4.94792
1	41.85	7.98571	13.6077	4.82	19.05	7.05	25.0821	6.2	4.73	4	2.875	8.41667	8.5	5.75
1	44	13.8	13.9231	9.2	13.65	6.25	10.8988	2.7	9.5	4.28571	2.5	2.83333	2.85292	1.94833
1	81	14.6429	4.46154	11.6	23.4	2	11.8357	3	5.5	3	0	0.583333	8.54167	5.10417
1	36.63	8	14.25	23.2	15.6	5.4625	10.2417	8.75	38.5	1.5	2.5625	3.20833	4.16667	7.08333
1	30.52	7.21429	7.4	10.2	4.2	7.5	11.8036	10.7	28.25	0.5	7.9375	6.66667	12.9167	6.83333
1	49	9.14286	4.25192	5.85	9.675	2.525	6.99286	6.05	7.85	1.5	0	0	6.875	4.5375
1	51.336	9.14286	10.8308	7.6	13.5	2.5	4.82738	4	1.05	1.5	3.125	3.33333	15	1.33333
1	49	12.8571	7.20769	10.8	12	0	8.9619	9	1.5	0	1.25	0.583333	10.4167	1.92708
1	47.56	4.64286	3.95	9.5	1.05	2.875	6.0131	1.5	3.7	3	2.5	0	6.66667	2.29167
1	36	7.08571	3.09615	4	7.5	0	7.90476	7.38	12.5	4.35714	3.375	5.58333	12.9167	5.24375
1	42.42	8.67143	11.0231	8.1	3	8.5	5.81429	9.05	9.95	4.5	0.875	4.66667	6.25	2.23958
1	27.56	8.51429	7.87115	10.9	61.5	2.1	8.15476	12.4	17.9	3	5	13.4167	10.8333	4.41667
1	32	6.05286	9.53846	9.24	19.575	0.75	5.21429	12.7	7.59	0	0.35	0.983333	1.60417	2.26042
1	34.7	10.2857	8.07692	2.24	0	1.4	7.81429	4.325	8.55	1.5	0.35	1.45833	9.16667	5.66667
1	53.75	9.88714	4.77885	16.4	3.465	0.2625	9.5619	6.61	5.24	6.33571	0.7	4.79167	10	3.0625
1	38.09	23.5714	8.84615	6.14	10.935	3.45	9.42857	5.9	11.9	8.57143	0.6875	4.35	6.41667	2.15833
1	29.8	47.4571	6.71058	14.904	19.575	6.5	4.10833	21.01	4.25	1	1.3	0.283333	4.875	2.49167
1	58.83	8.20714	17.8885	7.66	3.465	0.35	4.78095	21.71	12.85	19.6429	1.575	3.06667	25.4167	6.875
1	41.39	14.6714	10.7019	10.184	66	4.875	7.32143	11.05	17.38	8.57143	1.75	1.65	18.3333	3.83333
1	46.4	13.2214	15.2019	10.2	25.125	2	7.07381	4.1	2.625	5	7.125	1.75	4.58333	3.85417
1	66.28	13.3086	10.7692	30.05	4.41	0.42	13.306	2.135	0	0	17.5	0.583333	2.5	7.5
1	56.65	5.91429	10.5337	3.05	5.145	1.155	5.29452	18.56	4.5	1.5	1.525	2.7	15.625	0.9375
1	20.7	15.9286	5.22	1.422	6.6	1.25	4.63333	0.25	14.5	0.714286	0	0.0166667	10.4167	5.52083
1	26.85	15.1571	4.43077	38.04	16.5	0.72	8.6619	2.14	1.07	0.428571	7.125	0.666667	3.33333	1.9375
1	22.4	11.0643	0.523077	1.94	2.625	1.75	2.16476	19.3	3.3	3.85714	0.875	1.16667	8.66667	2.25
1	12.63	11.7143	8.44808	45.9	64.875	10	19.7143	1.7	1.4	2.5	3.375	0	6.77083	2.91146
1	26.9	58.2429	24.4981	13.708	26.25	11.25	25.4048	21.88	39.9	17.1429	0	0	18.75	4.625
1	73.83	17.2071	4.20962	41.89	2.025	2.625	15.1929	5.2	2.25	1.5	0	2.33333	5.83333	1.70833
1	13.95	10.8629	5.55769	3.8	0	12.5	3.14786	27.65	4.7	1	8.5	0.366667	8.5	2.9375
1	57.5	48.6714	24	6.5	18.75	5	2.79762	8.55	2.58	0	1.75	0.291667	7	2.125
1	34.18	16.7143	8.56346	6.72	23.475	0.85	5.7141	11	27.735	1	0.7375	1.2	8.33333	2.13542
1	35.7	8.65357	5.70885	6.85	6.5475	0.56	4.20429	2.83	4.8	1	2.25	0.933333	8.125	5.90625
1	40	43.3571	9.76923	20	9	0	7	2.1	7	0	0	0	11.725	5.44375
1	59.05	32.5	14.5481	35	74.1	0	21.1452	26.6	39.1	14.2857	0.875	1.75	41.9792	7.85417
1	31.5	12.7143	11.3462	5.2	20.25	0	15.5357	1.75	2.5	1.5	1.775	0	11	3.64375
1	34	22.9143	11.0969	16.48	3	0	11.719	10.2	12.8	17.8571	0	6.20833	12.5	3.15417
1	26.5	4.63571	12.0385	5.52	22.5	0	12.3119	10.5	9.25	2	0.7875	2.25	14.5833	5.10417
1	35	3.5	8.46154	11.28	9.3	2	6.85571	4.39	0.525	0	0	1.16667	12.5	1.5625
1	32	0.714286	1.69231	6	7.5	0	5.70476	10.5	1.05	5.14286	0	3.41667	3.33333	1.5
1	33.6	7.45714	8.59615	8.65	24	3.025	8.89643	11.15	31.25	7.28571	8.25	4.375	13.75	7.0125
1	36.75	20.3143	12.3077	5.248	0	0	14.1905	26.49	4.2	7.03571	2.5	0.583333	8.33333	3.04167
1	29.6	11.1286	11.0308	9	3.6	0	10.0643	2	1.365	0	5	0	14.5833	6.45833
1	30.75	10.5143	12.8308	4.324	2.1	2	8.10905	16.025	1.26	1	12.9375	0	10	5.9375
1	45	21.4143	8.51923	27.98	7.5	4.8	13.0286	9.15	3.18	5.71429	14.25	1.75	19.1667	4.04167
1	21.5	13.2857	21.7808	13.01	12.63	3	12.1607	23.505	7.89	2.5	1.225	5.975	28	11.25
1	45.84	26.8857	12.9	27.1	4.515	0	12.6548	5.1	0	0	0.875	0	3.33333	3.875
1	47.7	5.24286	10.2923	27.95	0	0	21.8352	0.72	0	1.5	8.75	0	10.4167	2.42188
1	29.4	6.2	16.9423	13.21	0	0	24.0162	6.59	14.2	9.57143	9.7625	5.08333	17.6458	7.33542
1	22.7	4.25	5.30769	8.6	21.3	0	23.93	3.775	12.005	3	1.225	2.075	7.5	1.44167
1	29	20.28	20.5192	18.66	25.125	0	18.306	5.87	3.19	3.6	5.75	4.85	7.75	4.75
1	32	5.80357	11.1538	4	0	2.85	21.1669	7	2.03	2	7.125	1.16667	16.0417	5.97917
1	12	6.58571	19.2115	12.54	2.3625	5.67	25.2864	5.73	26.4	2	4	3.90833	8.4375	3.5
1	38	14.8571	19.5	54.26	3.4125	7.65	29.0393	18	2.015	0	0	0.583333	10.5	10.625
1	22.25	5.35357	6.53846	2.66	40.35	5.35	16.7405	14.05	8.2	1.5	18.75	0	25	5.88542
1	66	13.4286	1.89615	4	0	0	7.70238	0.175	1	0	15	0	7.5	1.21875
1	51	1.92857	15.8846	19.7	45	2.5	11.1905	19.6	11.2	6.78571	7.5	6.66667	28.3333	4.45833
1	39	4.1	10.3962	15.86	0	1.2	15.4619	3.65	2.44	2.5	6.875	2.83333	7.75	4.625
1	18.445	2.86214	10.9873	6.34	11.025	0	7.40452	3.1	30.19	1.7	0.875	4.51667	13.5417	7.23958
1	26.2	24	35.0385	19.6	7.5	39.25	28.1643	14.3	10.9	4.5	1.75	2.33333	6.66667	4.58333
1	30.8	15.6071	13.2692	11.86	57	0	26.9762	8.7	3.25	0	2.5	0	3.75	1.54167
1	0	0	0	0	0	0	0	0	0	0	0	0	0	0
1	17.7	11	15	1	8.1	2.5	26.506	4.85	1.05	9.14286	7.5	0	7.5	1.65625
1	28	15.6857	26.5385	3.6	34.725	0	30.6131	29.35	10.5	7	4.375	11.1667	8.85417	2.16667
1	15.6	6.22857	6.07692	3.975	24.75	0	9.8	3.05	22.45	4	2.85	0.583333	5.20833	1.46354
1	20.14	7.82143	12.7385	3.745	7.2	0	11.9688	5.29	4.13	2.5	0.675	3.30833	11.4583	4.5625
1	27	10.75	7.42308	20.175	10.365	0.6125	16.0167	5.95	1.155	1	0.875	2.33333	6.83333	3.125
1	0	0	0	0	0	0	0	0	0	0	0	0	0	0
1	43.5	13.5	19.4423	20.19	6.75	0	18.5845	3.61	14.475	9.21429	6.375	9.58333	15.25	11.625
1	26.799	12.5571	30.9808	7.72	21	2.5	18.2983	4.87	5.04	8.71429	2.375	4.5	8.66667	3.89167
1	46.85	24.0286	12.0769	1.84	5.46	0.8	25.6905	5.19	12.5	1.5	1.4375	1.16667	15	6.875
1	31.2	8.36429	7.83077	20.86	0	0	16.2271	8.76	32.7	3.5	0.875	1.75	23.5417	3.28125
1	38	0	8.19038	16.175	33	0	7.92143	5.14	1.4	0	1.5	0	0	4.29167
1	26.1	15.3643	5.19231	10.26	23.55	0	16.9202	6.05	6.05	8.57143	0	3.79167	4.16667	5.70833
1	27.7	10.9214	13.0865	20	40.5	3.2525	10.9667	6.21	8.68	1.5	1.75	0.583333	10.1875	3.3125
1	0	0	0	0	0	0	0	0	0	0	0	0	0	0
1	0	0	0	0	0	0	0	0	0	0	0	0	0	0
1	60.5	14.3286	13.2154	21	27	0.5775	13.4286	12.6	4.48	1.5	1.3125	1.75	17.5	9.5
1	41.6	67.1429	14.9769	24.8	15	2.3625	28.5619	21.8	7	7.5	0	0	28.125	2.5625
1	40	21.7571	10.1192	11.64	7.65	0	12.321	4.25	1.75	2	1.25	0.583333	9.1125	4.41562
1	46.8	25	18.3558	14.8	15	2	14.869	17.95	31.58	4.5	7.5	1.80833	6.125	1.79375
1	36.45	20.7857	11.4462	19.86	0	3.2	15.0952	18.06	26.4	0	3	2.91667	6.66667	5.91667
1	29.575	14.8143	13.5442	11.26	14.4	0.875	13.3769	3.69	6.72	4	1.05	2.33333	15.3333	6.16667
1	29.39	8.8	18.6731	6.7	0	0.8	17.606	9.45	5.24	14.3429	5	14.5	12.5417	9.1875
1	35.05	5.62143	17.2231	9.64	12.6	0	15.8445	5.5	11.54	12.8571	0	12.25	13.75	5.625
1	0	0	0	0	0	0	0	0	0	0	0	0	0	0
1	47.4	4.40714	4.07692	8.76	36.9	0	6.50238	11.9	2.17	0	3.975	5.66667	8.33333	9.5
1	18.38	3.85	11.5192	8.21	11.25	2.45	6.92726	2	19.49	2	1.6875	13.9167	7.1875	1.78125
1	62	3.635	4.58846	12.4	9.75	0	9.1581	1.625	3.75	0	0.35	0	11.6667	1.44375
1	23.925	3.26429	14.8885	9.35	7.65	2.5	16.8229	4.6	18.715	4	4.6375	1.75	5.83333	5.41667
1	51.9	3.48571	8.01923	6.45	8.2575	5.7525	16.1929	1.4	1.19	1.5	5.125	0.583333	13.5	5.58333
1	30	5.81286	1.55769	14.48	72	1.75	9.91143	14.4	32.7	1	0.2625	1.925	3.75	1.625
1	30.98	4.86	9.44231	9.43	17.25	1.0125	16.6098	5.6	29.15	3	5.75	2.91667	8.54167	4.6875
1	39.8	6.42857	13.9154	2.94	21.15	2.5	19.706	7.7	4.985	4.8	4	3.5	9.5	8.66667
1	47.7	7.53571	5.61923	6.04	21.93	2	8.37619	10.9	5.85	1.5	0.875	2.91667	13.8875	2.75
1	32.42	5.27857	14.1192	3.08	23.55	0.525	5.71429	8.55	22.65	0	0.875	3.5	5.58333	2.375
1	21.2	10.5857	13.1058	10.26	20.25	0	7.78571	3	0.525	0	2.5625	1.16667	7.5	1.625
1	44	15.6429	29.3577	13.2	34.5	1.4	23.0587	10.5	15.08	0	9.375	1.16667	8.75	6.92708
1	32	5.18214	4.5	2.82	21.15	0	20.5333	1.2	30.98	2.5	2.1375	2.25	3.75	1.78438
1	31.2	7.49286	2.07692	4	0	0	8.65476	3.7	1.99	0	5	0	5.83333	3.35417
1	76.05	9.21429	22.2692	7.2	5.46	6.35	21.331	20.95	12.38	4	6.25	3.33333	18.75	11.3542
1	26.365	1.90357	7.80769	3.66	4.8	0	4.06429	6.21	16.05	5.71429	1.75	1.80833	17.5	7.15625
1	30.425	11.8207	5.175	16.2	6.75	0	17.0186	4.4	8.245	1	1.75	1.75	3.75	2.125
1	12.205	11.9286	8.24615	5.85	4.65	0.6825	13.4917	5.79	18.34	0	3.75	1.75	10.4167	3.22917
1	7.525	2.6	1.77692	0.175	5.835	3.3375	2.06333	12.785	37.1	1.2	1.1	2.91667	14.4375	1.34063
1	28.7	5.42857	3.32692	10.9	21.75	0	6.82619	19	39	4.28571	5.875	3.91667	12.5	1.875
1	32	0	1.92308	6.2	32.25	0	5.12381	7	2.9	2	1.75	0	8.33333	3.64583
1	40	10.7571	2.81154	2.24	2.835	0	8.75595	7.75	7.45	16.4286	3.375	0.291667	7.91667	2.86167
1	47.85	3	9.53077	7.6	15.6	0.525	6.26667	10	19	10.7143	12.5	1.66667	7.29167	1.97917
1	30.42	11.6786	4.11538	2.94	15.6	8.775	4.95952	16.33	1.05	2	12.5	3.5	5.5	1.7875
1	60.77	5.85714	1.51923	7.1	3.6	4.5	4.74048	1.55	0	0	8.75	0	5.20833	0.260417
1	37.42	6.85714	3.67692	10.9	9	5	4.8869	5.43	23.05	1.5	10	6.66667	21.3125	3.23125
1	30	4.68571	3.04231	7.8	22.5	3.2	8.43452	13.75	34.6	2.6	2.625	2.25	9.9	4.05625
1	30	4.03571	6.69231	14.64	6.075	4.25	15.1352	5.8	3.6	3	7	1.75	11.9792	5.83333
1	40.28	4.40714	4.76923	3.78	21	5	5.33095	19.05	33.5	8.57143	12.5	0	10.3125	4.50312
1	57	5.3	6.59231	10.2	9.15	1.4	6.87381	10.35	10.45	7.28571	2.5	0.583333	10.8333	0.5
1	17.42	9.28571	8.4	9.85	37.575	0.525	6.13095	7.5	28.5	5.35714	2.5	2.83333	3.41667	0.791667
1	22.5	6.82143	5.78846	9.34	5.175	0.525	8.91667	12	2	0	2.9375	1.16667	5.5	2.54375
1	32	10.6429	5.85	7.1	24.075	11.25	7.44167	17.83	10.15	8.64286	7.5	3.5	9.91667	3.5
1	27.78	9.57143	9.00385	8.99	18.06	1.575	5.86429	7.35	11.725	1	4.1875	0.583333	8.75	3.48958
1	45	8.30571	13.0308	14.29	7.5	2	9.50714	12.2	1.25	1.5	15.625	0.641667	10.25	4.84375
1	36.7	31.2857	3.23077	15.4	0	0	6.30952	2.06	0	0	1.6875	0	6.25	2.1875
1	32	7.14286	6.51923	4.44	18	0	22.5705	3.76	1.84	1	2.25	1.75	7.5	1.375
1	31.8	42.6286	6.51154	22.5	59.55	1	16.2931	12	2.95	1	56.25	1.5	10.4167	6.54167
1	53.63	20.8857	14.4019	7.3	14.55	0.37	9.27405	5.12	1.6	1.5	0	1.43333	8.25	3.4375
1	44.025	20.0057	24.2115	16.2	22.05	2	10.1562	2.275	5.2	0.5	7.225	0.933333	15.125	10.3125
1	51.45	19.4429	6.23077	14.8	25.335	0.08	7.55357	7.45	1.7	0.428571	1.225	0.5	12.5	3.54167
1	32.2	4.42857	2.46154	4.8	1.05	2.5	1.4619	0.56	6	0	0.35	0	12.5	3.1875
1	42.1	8.94571	14.4192	10.8	5.46	7.05	4.07143	4.015	30.35	4.28571	9.5	1.83333	3.75	1.88125
1	25	3.90714	5.88077	2	9	0	2.4619	0	0.35	0	3.75	0	7.29167	1.77083
1	23.8	13.6714	19.1058	18.4	51	0.42	11.5714	4.21	11.225	0.2	0	0.291667	5	2.125
1	17	2.43571	1.31923	13.6	4.41	0.28	4.41905	1.34	2.75	2	1.25	2.075	11.4583	4.01042
1	34.21	16.7457	8.75	10.3	20.31	1.2	16.0286	2.95	23.725	6.42857	1.925	1.63333	5.83333	2.41667
1	30	14.8886	13.4135	32.3	9	0.8	15.3095	16	9.2	2.85714	6.25	0.466667	8.85417	4.42708
1	38	9.17143	10.6096	10.2	14.1	2	5.59524	21.06	21.81	2	2.1125	4.325	8.33333	7.5
1	34	14.1714	4.49038	43	8.1	0	10.875	14.735	5.525	2	0	2.25833	5.5	6.25625
1	33.64	6.20286	2.76923	3.64	1.575	6.5	2.60476	8.2	3.39	3.5	0.875	1.16667	7.29167	0.677083
1	42.4	6.85714	7.23077	6.24	4.2	1.4	8.28571	6.85	13.1	2.5	0.875	0.291667	16.875	4.45312
1	45	4.35714	6.57692	47.4	0	0	17.7429	0.77	2.5	0	3	0	8.33333	3.125
1	20.75	14.1786	1.84231	8.2	32.76	0	8.12714	4.968	2.85	3.57143	1.775	1.86667	10.9375	3.15104
1	53	40.6429	9.74038	11.94	12.825	5	12.8214	8.55	3.5	0	0.875	0	20.8333	4.27083
1	76.4	25	6.15385	6	0	0	4.77381	1.575	0	0.428571	12.5	0	2.08333	1.04167
1	64.26	16.4286	19.9615	7.385	18.75	7.5	20.5786	23.5	9.55	2.5	16.75	2.91667	21.25	6.25
1	25	5.56429	4.01538	0	7.335	0.525	9.64048	5.05	0.525	3.5	2	2.91667	16.225	7.7
1	26	7.28571	10.0231	9.56	9.3	0.35	2.76429	3.2	29.825	2.25	6.6875	3.91667	2.0625	1.90437
1	42	42.1429	9.45192	8.42	0	1.25	0.238095	4.35	1.05	4.5	0.4375	0	8.33333	5.83333
1	54.75	17.6714	30.6923	35.84	45.75	11	18.6571	19.7	28.15	20	13.375	10.875	16.6667	7.31771
1	45	12.5714	4.84615	17.68	16.5	1	14.5048	9.85	11	2.5	2.725	3.20833	10.7292	3.22917
1	22.35	21.1286	11.6538	12.64	6	4	14.7857	4.92	6.4	1.5	0	0	12.5	5.41667
1	33.48	16.5714	13.4038	5.84	31.5	0.805	12.744	11.4	15.45	7.28571	4.9	2.25	21.875	3.90625
1	46.15	25.1429	5.63846	26	99	4	11.9643	5.05	7.5	0	1	0.291667	3.4375	5.83275
1	53.7	14.2857	19.8077	13.2	28.05	4.5	17.2071	15.3	3.075	1.5	0.4375	1.75	1.45833	1.27604
1	35.44	31.7143	12.6596	16.2	15.75	0	21.8988	1.14	8.9	4	1	3.5	7.5	4.03125
1	54	27.5714	20.0481	59	57	10	19.4286	14.95	3.5	0.5	0	1.16667	15	7.91667
1	31.05	7.54286	5.14231	1.68	29.7	3.5	9.9119	6.75	9.75	2.5	2.1	2.91667	10.2083	1.75
1	23.3	8.49286	6.07692	17.8	4.2	2	14.5476	13	2.8	0	0.7875	0	20.5	3.25
1	33.8	26.4286	12.0673	24.8	30	3.6	14.6429	7.955	7	4	4.0125	1.575	6.25	3.33333
1	53.8	25.7143	12.25	29.8	0	2	15.6393	23.6	3.5	4.5	0	0	17.7625	3.01875
1	58.7	26.4286	16.3519	25.3	4.2	6.75	23.95	29	15.26	12	7.25	2.39167	26.25	5.25
1	36.5	25.7143	15.3846	14.8	12	2.5	14.4119	14.8	1.89	3	2.25	0	7.65	1.3
1	45.8	25.7143	8.73077	14.8	4.2	4.5	14.5595	4.2	1.4	3	1.3125	0.408333	13	3.5
1	17.7	6.14286	10	14.3	3.825	0	6.33833	6.862	11.7	3	0.525	0.816667	12.825	1.67625
1	32.2	25.7143	19.6394	14.8	30	4.05	15.2571	17.025	23	4.5	4.5	2.04167	2.5	2.1875
1	33.25	11.1429	8.63846	12.1	4.5	10	17.499	6.35	4.6	4.5	2.25	0	12.5	2.47917
1	48.8	28.7857	13.8077	14.8	0	0	17.7643	19	1.4	7.5	5	0	3.84583	0.73125
1	46.05	16.95	10.9731	6.9	4.725	0	21.4	9.4	4.2	2.5	2	0.408333	9.33333	2.42
1	63	12.7	13.0308	7.6	13.5	2.5	29.43	7.905	33.4	1	1	0.583333	8.75	3.54375
1	27	11.5714	7.01538	16.6	14.55	8.4	19.9043	3.98	30.705	2	0.6125	3.41667	5.625	1.1875
1	51.6	25	4	7.3	0	0	14.5238	4.55	5.6	0	1.1375	0	4.6875	2.8125
1	40.8	26.2857	11.7692	37	0	1.575	21.0714	33.9	7.7	30	6.5	2.1	6.70833	1.69167
1	80.65	35.3571	10.5769	35.8	0	0	20.0698	12.2	1.4	10.5	2.275	0	10	3.83333
1	29.2	30	9.35192	14.8	4.2	4.5	17.4857	19.105	14.97	4.5	5	2.04167	8.85417	1.66667
1	35.68	10.7143	8.625	13.5	1.05	1.4	16.2143	11	4.27	0	2.1	0	6.625	1.5625
1	30.6	10.7143	11.6154	14.8	30	0	13.2202	24.05	26.65	21.4286	1.75	1.69167	8.9375	2.75
1	48.6	23.5714	7.76923	29.8	12	0	19.0457	6.95	1.4	6	1.925	0	7.39583	2.70833
1	82.75	14.5714	10.3019	14.8	12	0	18.1792	19.35	2.1	15	6.5	1.80833	12.9375	4.95
1	64.6	25.5	6.80769	13.5	0	0	20.0214	22.4	0.98	0	5	0	9.7625	2.40625
1	0	0	0	0	0	0	0	0	0	0	0	0	0	0
1	64.6	26.4286	6.15385	14.8	15	0	18.7019	26.5	2.8	15	1.3125	0	9.87083	2.20417
1	48.325	26.2857	15.9904	13.5	0	0	19.0589	22.4	5.6	2.5	5.5	1.80833	17.7083	3.47083
1	45.42	28.0357	23.7808	42	31.5	4.5	18.2093	7.1	8.4	3	1	0.408333	10.375	3.5875
1	43	9.57143	12.4827	17.8	12	1.575	10.131	5.8	5.6	7.5	4	1.69167	8.625	1.53125
1	47.2	24.2857	6.15385	23.8	0	2	15.7333	25.45	7.98	4.5	0.7	2.04167	9.89583	2.5
1	28.39	23.2857	10.3346	14.8	12	2	12.1226	5.75	4.9	1.5	0.9625	0	6.875	2.54375
1	33.99	31.3457	8.4	18.36	14.55	0	19.53	15.7	9.04	7.14286	0	2.33333	8.33333	3.08333
1	51	16.0714	9.12019	14.8	0	2.25	13.0595	24.5	7	13.5	4.5	1.45833	15.8333	2.83333
1	31.33	16.7143	24.6923	18.6	63.75	0	14.4298	4.2	0	0	12.25	5.91667	13.125	2.5
1	0	0	0	0	0	0	0	0	0	0	0	0	0	0
1	19.2	3.06571	10.3385	11.8	7.5	10	11.9721	12.1	26.35	5.78571	0	1.16667	13.3333	3.08333
1	25.5	8.16	13.1846	9.2	22.5	0.7	10.4512	6.225	29.38	5.71429	4.25	0.583333	7.5	1.8375
1	50	12.7214	9.80769	8.1	13.5	0	13.8857	8	9.1	2	1.75	0	13.75	4
1	46.5	21.0714	9.49231	47.26	6.21	5	19.2786	7.8	0	0	23.375	0	5.625	2.90625
1	43.2	13.8571	7.87692	11	33.75	0	17.7143	7.11	3.5	3	2.625	0.408333	12.25	3.48333
1	29.5	19.3571	8.40769	10.82	58.5	14	21.5495	6.91	36.2	1.35	2.1375	2.91667	8.25	1.92
1	49.2	21.8571	11.0038	36	11.25	4	22.891	5.8	1.4	0	37.5	0	14.5833	7.4375
