# Supplementary material for: Building Up a Robust Risk Mathematical Platform to Predict Colorectal Cancer
Source: Hindawi journal article supplement (doi:10.1155/2017/8917258), 2017-01-01
Supplement: f1 [file 8917258.f1.zip › Supplementary/Supplementary S5.docx]

**SNPs Results from SPCA**

| This file is the SNPs results from SPCA  This file includes six worksheets, PC1, PC2, PC3, PC4, PC5, PC6  PC are the uncorrelated linear combinations of original variable |
| --- |

| PC1 PC2 PC3 PC4 PC5 PC6  rs10046 0.165 0.000 0.000 0.000 0.000 0.000  rs10505477 0.196 0.000 0.000 0.000 0.000 0.000  rs1152579 0.000 0.000 -0.489 0.000 0.000 0.000  rs1229984 -0.324 0.000 0.000 0.000 0.000 0.000  rs1239178 -0.142 0.000 0.000 0.000 0.000 0.000  rs1255998 0.248 0.000 -0.191 0.000 0.000 0.000  rs1256030 -0.082 0.000 -0.408 0.000 0.000 0.000  rs1256049 0.246 0.000 -0.144 0.000 0.000 0.000  rs1271572 -0.033 0.000 -0.540 0.000 0.000 0.000  rs12953717 -0.037 0.000 0.000 0.000 -0.695 0.000  rs1329149 -0.086 0.000 0.000 0.000 0.000 0.612  rs1447295 -0.197 0.000 0.000 0.000 0.000 0.000  rs16901979 -0.060 0.000 0.000 0.000 0.000 0.000  rs16941669 0.000 0.250 0.000 0.000 0.000 0.000  rs17033 -0.211 0.000 0.000 0.000 0.000 0.000  rs1801132 0.163 0.000 0.000 0.000 0.000 0.000  rs2071454 -0.143 0.000 0.000 0.324 0.000 0.000  rs2075633 -0.236 0.000 0.000 0.000 0.000 0.000  rs2077647 0.016 0.000 0.000 0.831 0.000 0.000  rs2228480 -0.069 0.000 0.000 0.000 0.000 0.000  rs2249695 0.162 0.000 0.000 0.000 0.000 0.411  rs2486758 -0.106 0.000 0.000 0.000 0.000 0.000  rs3798758 -0.160 0.000 0.000 0.000 0.000 0.000  rs3820033 0.176 0.000 0.000 0.000 0.000 0.000  rs3829768 -0.060 0.000 0.000 0.000 0.000 0.000  rs4680 -0.102 0.000 0.000 0.000 0.000 0.000  rs4767939 0.000 0.553 0.000 0.000 0.000 0.000  rs4767944 0.214 0.000 0.000 0.000 0.000 0.000  rs4939827 -0.011 0.000 0.000 0.000 -0.719 0.000  rs4986938 -0.085 0.000 0.000 0.000 0.000 0.000  rs671 -0.066 0.000 0.000 0.000 0.000 0.000  rs676387 0.148 0.000 0.000 0.000 0.000 0.000  rs6905370 0.188 0.000 0.000 0.000 0.000 0.000  rs6983267 0.177 0.000 0.000 0.000 0.000 0.000  rs7296651 0.000 0.582 0.000 0.000 0.000 0.000  rs7837688 -0.215 0.000 0.000 0.000 0.000 0.000  rs8018687 -0.010 0.034 0.000 0.000 0.000 0.000  rs8192772 -0.035 0.000 0.000 0.000 0.000 0.676  rs8192775 -0.109 0.000 0.000 0.000 0.000 0.000  rs827421 0.080 0.000 0.000 0.452 0.000 0.000  rs886205 0.000 0.540 0.000 0.000 0.000 0.000  rs915908 -0.113 0.000 0.000 0.000 0.000 0.000  rs928554 -0.059 0.000 -0.497 0.000 0.000 0.000  rs9322354 0.205 0.000 0.000 0.000 0.000 0.000  rs9340799 -0.260 0.000 0.000 0.000 0.000 0.000  rs9479119 -0.175 0.000 0.000 0.000 0.000 0.000 |
| --- |

**Demographic Characteristics Results from SPCA**

| This file is the demographic characteristics results from SPCA  This file includes six worksheets, PC1, PC2, PC3, PC4, PC5, PC6  PC are the uncorrelated linear combinations of original variable |
| --- |

| PC1 PC2 PC3 PC4 PC5 PC6  sex -0.025 0.000 -0.220 0.000 0.000 0  age -0.030 0.000 0.584 0.000 0.000 0  BMI_now_group -0.040 0.000 0.000 -0.552 0.000 0  BMI_10_group 0.000 0.000 0.000 -0.834 0.000 0  labour -0.141 0.000 0.000 0.000 0.454 0  activity 0.000 0.000 0.000 0.000 -0.891 0  family_size 0.000 0.000 -0.092 0.000 0.000 0  marriage 0.000 -0.003 0.526 0.000 0.000 0  emotion 0.000 -0.180 0.233 0.000 0.000 0  character 0.000 0.000 -0.122 0.000 0.000 0  mood 0.107 -0.004 0.076 0.000 0.000 0  relationship 0.044 -0.108 0.000 0.000 0.000 0  trauma 0.000 -0.674 0.000 0.000 0.000 0  depress 0.000 -0.708 0.000 0.000 0.000 0  sleeping 0.000 0.000 -0.347 0.000 0.000 0  exercise 0.046 -0.007 -0.338 0.000 0.000 0  cholesterol 0.581 0.000 0.000 0.000 0.000 0  blood_fat 0.575 0.000 0.000 0.000 0.000 0  fat_results -0.541 0.000 0.000 0.000 0.000 0  cancer1 0.000 0.000 0.000 0.000 0.000 0  cancer2 -0.014 0.000 -0.128 0.000 0.000 0 |
| --- |

**Lifestyles Results from SPCA**

| This file is the lifestyles results from SPCA  This file includes six worksheets, PC1, PC2, PC3, PC4, PC5, PC6  PC are the uncorrelated linear combinations of original variable |
| --- |

| PC1 PC2 PC3 PC4 PC5 PC6  class 0.000 0 0 -1 0 0  smoking -0.234 0 0 0 0 1  drinking -0.972 0 0 0 0 0  smoke_and_drink 0.000 0 1 0 0 0  tea 0.030 0 0 0 -1 0  coffee 0.000 1 0 0 0 0 |
| --- |

**Foods Results from SPCA**

| This file is the foods results from SPCA  This file includes six worksheets, PC1, PC2, PC3, PC4, PC5, PC6  PC are the uncorrelated linear combinations of original variable |
| --- |

| PC1 PC2 PC3 PC4 PC5 PC6  class 0.000 0.000 0.000 -1 0 0  Grain -0.327 0.000 0.179 0 0 0  Melons -0.538 0.000 -0.049 0 0 0  Bean_products -0.372 -0.165 0.000 0 0 0  Roots -0.556 0.000 -0.021 0 0 0  Fruits -0.021 -0.345 0.000 0 0 0  Nuts -0.033 -0.298 -0.051 0 0 0  Vegetables -0.390 0.000 0.124 0 0 0  Meat -0.025 0.000 0.000 0 1 0  Eggs_and_milk 0.000 -0.614 0.000 0 0 0  Seafood 0.000 -0.357 0.000 0 0 0  Pickles -0.024 0.000 0.000 0 0 1  Algae 0.039 -0.511 0.000 0 0 0  Oils 0.000 0.000 0.691 0 0 0  Seasoning 0.000 0.000 0.685 0 0 0 |
| --- |
